# Supplementary material for: Simple sequence repeat marker development from bacterial artificial chromosome end sequences and expressed sequence tags of flax (Linum usitatissimum L.)
Source: PubMed Central journal article supplement (PMC3405236; doi:10.1007/s00122-012-1860-4), 2012-04-07
Supplement: 122_2012_1860_MOESM2_ESM.pdf [file 122_2012_1860_MOESM2_ESM.pdf]

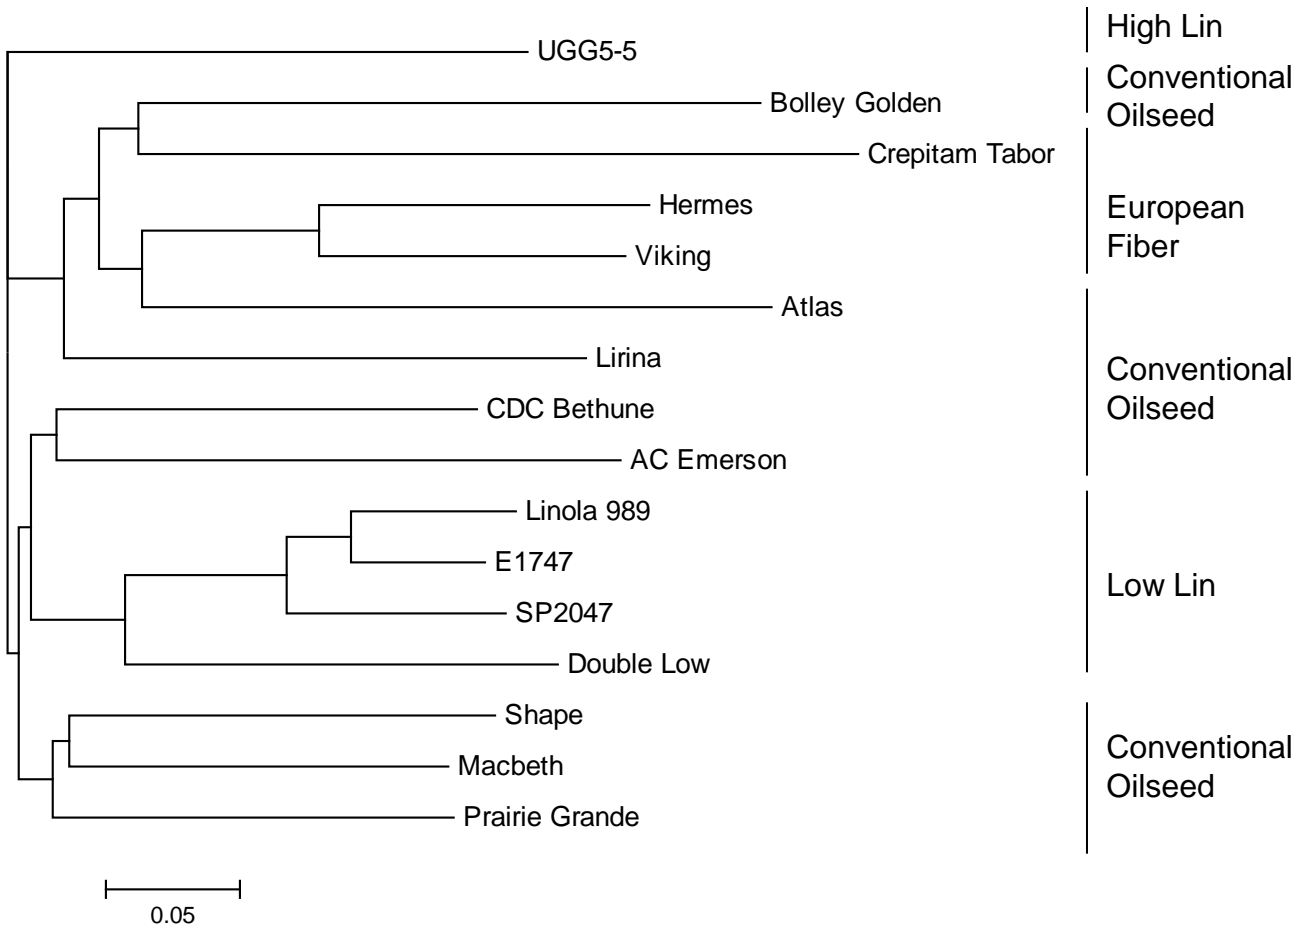

Supplementary data Figure S2: Phylogenetic tree of the 16 accessions generated by the Neighbor-Joining method (Nei 1973) as implemented in PowerMarker (Liu and Muse 2005) using 869 SSR markers derived from the 818 primer pairs described herein.
