# Supplementary material for: Simple sequence repeat marker development from bacterial artificial chromosome end sequences and expressed sequence tags of flax (Linum usitatissimum L.)
Source: PubMed Central journal article supplement (PMC3405236; doi:10.1007/s00122-012-1860-4), 2012-04-07
Supplement: 122_2012_1860_MOESM3_ESM.pdf [file 122_2012_1860_MOESM3_ESM.pdf]

Supplementary Data Table S1: BES-SSR and EST-SSR list including marker name, number of loci, SSR type, SSR sequence, number of alleles, observed allele sizes and primer sequences

BES-SSRs

| Marker  | No loci | SSR type | SSR sequence                                                       | No alleles | observed allele sizes | Primer  | Sequence (5' -> 3')        | Tm (°C) | GC          |             |
|---------|---------|----------|--------------------------------------------------------------------|------------|-----------------------|---------|----------------------------|---------|-------------|-------------|
|         |         |          |                                                                    |            |                       |         |                            |         | content (%) | Length (bp) |
| Lu2098  | 1       | p3       | (AAG)11                                                            | 2          | 209 227               | Lu2098F | CGGCTGCTGAGAGTATTGG        | 59.6    | 57.9        | 19+20       |
|         |         |          |                                                                    |            |                       | Lu2098R | CATCAGAAGCTCGGAGAAGG       | 60.1    | 55          | 20          |
| Lu2100  | 1       | p3       | (ATC)9                                                             | 2          | 226 229               | Lu2100F | AGCGCTGATTGAGCGAGAG        | 61.9    | 57.9        | 19+19       |
|         |         |          |                                                                    |            |                       | Lu2100R | GCCATCTGTGGAGAGGAGAG       | 59.9    | 60          | 20          |
| Lu2101  | 1       | p3       | (GAA)8                                                             | 2          | 289 321               | Lu2101F | AAACCACCCCTTCCATATCC       | 59.9    | 50          | 19+20       |
|         |         |          |                                                                    |            |                       | Lu2101R | AACCAGCAATCTGACAATCG       | 58.7    | 45          | 20          |
| Lu2102  | 1       | p5       | (GATTA)5                                                           | 2          | 241 246               | Lu2102F | GAGGAATGTCGTGAGTTACAAAC    | 57.8    | 43.5        | 19+23       |
|         |         |          |                                                                    |            |                       | Lu2102R | TGCCGAGTGAGTTTGAGTTG       | 60      | 50          | 20          |
| Lu2103  | 1       | p3       | (GGA)8                                                             | 2          | 233 245               | Lu2103F | GCAGTCGTTGCACTTCATGT       | 59.9    | 50          | 19+20       |
|         |         |          |                                                                    |            |                       | Lu2103R | AGTGGTGAAGGAGCAGCAAG       | 60.6    | 55          | 20          |
| Lu2105  | 1       | p2       | (TA)16                                                             | 5          | 212 222 226 232 240   | Lu2105F | TGAGTCTATGCAACAATTTATGATTC | 58.7    | 30.8        | 19+26       |
|         |         |          |                                                                    |            |                       | Lu2105R | GACTCGGTGGATATTTGAAGG      | 58.5    | 47.6        | 21          |
| Lu2106  | 1       | p2       | (TC)16                                                             | 2          | 267 269               | Lu2106F | GGAGGAACAGGAAAGGAAGC       | 60.2    | 55          | 19+20       |
|         |         |          |                                                                    |            |                       | Lu2106R | CTGCCAAATTTCTCAGACG        | 60.8    | 50          | 20          |
| Lu2109  | 1       | p2       | (AG)11                                                             | 3          | 329 337 339           | Lu2109F | TGCCCTTCCCATAATACAGC       | 59.9    | 50          | 19+20       |
|         |         |          |                                                                    |            |                       | Lu2109R | GGTGGGGAAAATGGGAATAG       | 60.4    | 50          | 20          |
| Lu2110a | 2       | p3       | (CTT)7                                                             | 2          | 226 223               | Lu2110F | CCTTGCGAACTCTTTTACGC       | 60      | 50          | 19+20       |
| Lu2110b |         |          |                                                                    | 2          | 209 212               | Lu2110R | AGGAAATGCGAGAATGTTGG       | 60.1    | 45          | 20          |
| Lu2111a | 2       | p3       | (ATC)6                                                             | 2          | 306 312               | Lu2111F | TCTGCAGTACCCTCGATTCC       | 60.2    | 55          | 19+20       |
| Lu2111b |         |          |                                                                    | 2          | 285 291               | Lu2111R | AGATTCACCATCAGACGTTGC      | 60.1    | 47.6        | 21          |
| Lu2112  | 1       | p3       | (CAT)10                                                            | 2          | 231 254               | Lu2112F | AGGTTCAAGTGCACCACAGG       | 59.7    | 57.9        | 19+19       |
|         |         |          |                                                                    |            |                       | Lu2112R | ATGCATGAATGGACAAATGG       | 59.2    | 40          | 20          |
| Lu2113  | 1       | p2       | (CT)10                                                             | 3          | 342 344 350           | Lu2113F | CGGGAAGAAAACATCTCTCG       | 59.8    | 50          | 19+20       |
|         |         |          |                                                                    |            |                       | Lu2113R | AAGAGGAACACGAGGACACG       | 60.3    | 55          | 20          |
| Lu2115  | 1       | c        | (TAT)8tggtactgctactacttttcagttttaattaa<br>tcggattgttcttcttac(TA)15 | 5          | 452 465 467 469 471   | Lu2115F | TGTTAAGCGTCGTGTGCTC        | 58.6    | 52.6        | 19+19       |
|         |         |          |                                                                    |            |                       | Lu2115R | CCCACAAAAGTGACGAGAG        | 58.3    | 50          | 20          |
| Lu2118  | 1       | p3       | (TAA)12                                                            | 2          | 327 342               | Lu2118F | TACCGGAAGCTACCCATCAC       | 60      | 55          | 19+20       |
|         |         |          |                                                                    |            |                       | Lu2118R | CGGGCCCTATTATTTTCTCC       | 59.8    | 50          | 20          |
| Lu2119  | 1       | p2       | (GA)12                                                             | 2          | 216 218               | Lu2119F | TCTGCACAGGGGAAAAGAAG       | 60.4    | 50          | 19+20       |
|         |         |          |                                                                    |            |                       | Lu2119R | TAACCTTCTCCGGGATTTG        | 59      | 45          | 20          |
| Lu2120a | 2       | p2       | (CT)14                                                             | 2          | 272 274               | Lu2120F | TTCGATAGGCCCTTTTAGC        | 60.5    | 50          | 19+20       |
| Lu2120b |         |          |                                                                    | 2          | 253 255               | Lu2120R | CGCGGTTTTATGATCACTTG       | 59.2    | 45          | 20          |
| Lu2121a | 2       | p3       | (GGA)6                                                             | 2          | null 242              | Lu2121F | AAAGCAATGGGCAGAGAATG       | 60.2    | 45          | 19+20       |
| Lu2121b |         |          |                                                                    | 2          | null 238              | Lu2121R | TGGGATGTGGAAAGAAGAGC       | 60.2    | 50          | 20          |
| Lu2123  | 1       | p2       | (CA)9                                                              | 2          | 363 387               | Lu2123F | TGCAATAAAAACCCCCAGTC       | 59.8    | 45          | 19+20       |



|         |   |    |          |   |      |     |     |     |     |     |         |                         |      |      |       |
|---------|---|----|----------|---|------|-----|-----|-----|-----|-----|---------|-------------------------|------|------|-------|
| Lu2163  | 1 | p2 | (AT)18   | 6 | 378  | 384 | 386 | 388 | 392 | 406 | Lu2162R | GGTCTTTCTTTGTCGCATTCC   | 61   | 47.6 | 21    |
|         |   |    |          |   |      |     |     |     |     |     | Lu2163F | TGGTCTCCTAATTGGCTTGG    | 60.1 | 50   | 19+20 |
| Lu2164  | 1 | p5 | (ATATA)5 | 2 | 372  | 377 |     |     |     |     | Lu2163R | CAGGCGGGAGTATGATAGTTG   | 59.6 | 52.4 | 21    |
|         |   |    |          |   |      |     |     |     |     |     | Lu2164F | GCATGATCGTTACTTTAGGATGC | 60   | 43.5 | 19+23 |
| Lu2166  | 1 | p3 | (GAT)7   | 2 | 227  | 233 |     |     |     |     | Lu2164R | AATGACGCCATCTTTTGTCC    | 59.9 | 45   | 20    |
|         |   |    |          |   |      |     |     |     |     |     | Lu2166F | GGTTTGGATGGAAGGAAAGG    | 60.7 | 50   | 19+20 |
| Lu2168  | 1 | p2 | (TA)9    | 2 | null | 295 |     |     |     |     | Lu2166R | TGTTCTCCCCAAACATCGTC    | 60.9 | 50   | 20    |
|         |   |    |          |   |      |     |     |     |     |     | Lu2168F | ACAAGCAAAGGGTCACTCG     | 60.3 | 50   | 19+20 |
| Lu2169  | 1 | p4 | (AAGA)8  | 2 | 208  | 212 |     |     |     |     | Lu2168R | TGATGGAGCCAGTCATGAAG    | 59.8 | 50   | 20    |
|         |   |    |          |   |      |     |     |     |     |     | Lu2169F | GGATTTGTTTTTGCCTCTCG    | 59.7 | 45   | 19+20 |
| Lu2170  | 1 | p2 | (AT)11   | 2 | 321  | 323 |     |     |     |     | Lu2169R | AAAGCAAAGCAAAGCAGAGC    | 59.9 | 45   | 20    |
|         |   |    |          |   |      |     |     |     |     |     | Lu2170F | CTCCTCGATCACCTCTTTCG    | 59.9 | 55   | 19+20 |
| Lu2172  | 1 | p2 | (AT)10   | 2 | 390  | 392 |     |     |     |     | Lu2170R | GAAGATCAAGGGCTGTGACG    | 60.8 | 55   | 20    |
|         |   |    |          |   |      |     |     |     |     |     | Lu2172F | AGCTACCCCAACTTGTTTGC    | 59.2 | 50   | 19+20 |
| Lu2176  | 1 | p3 | (ATA)9   | 2 | 271  | 274 |     |     |     |     | Lu2172R | GGCTGGCTTCTTCTTTTGC     | 60.1 | 52.6 | 19    |
|         |   |    |          |   |      |     |     |     |     |     | Lu2176F | ATACAGGCCGGTCATTCATC    | 59.8 | 50   | 19+20 |
| Lu2178  | 1 | p3 | (AAT)8   | 3 | 292  | 295 | 308 |     |     |     | Lu2176R | CCCCTCGTGATTTCCAAAC     | 60.3 | 52.6 | 19    |
|         |   |    |          |   |      |     |     |     |     |     | Lu2178F | CAGAGGGAAGAAACGAAGAAAG  | 59.5 | 45.5 | 19+22 |
| Lu2182  | 1 | p2 | (TA)9    | 2 | 336  | 338 |     |     |     |     | Lu2178R | GTGGGAAAACGAAAAGTTGG    | 59.4 | 45   | 20    |
|         |   |    |          |   |      |     |     |     |     |     | Lu2182F | CTTGCTTCAATCGATCTCTGG   | 60   | 47.6 | 19+21 |
| Lu2183a | 3 | p2 | (AT)15   | 6 | 386  | 388 | 390 | 392 | 394 | 402 | Lu2182R | ATTAGGGGTGACACGAGAGC    | 59.2 | 55   | 20    |
| Lu2183b |   |    |          | 6 | 438  | 440 | 442 | 446 | 448 | 452 | Lu2183F | CTTCATGCAGTCCGTTTTTACA  | 60.2 | 40.9 | 19+22 |
| Lu2183c |   |    |          | 6 | 456  | 460 | 462 | 466 | 468 | 470 | Lu2183R | CAGTTCGTAGTTACTTGGTGACG | 60.3 | 45.8 | 24    |
| Lu2184a | 2 | p3 | (ATT)10  | 3 | 216  | 222 | 234 |     |     |     | Lu2184F | TGGCCTATATATGACGGTTGC   | 59.8 | 47.6 | 19+21 |
| Lu2184b |   |    |          | 3 | 202  | 208 | 220 |     |     |     | Lu2184R | AGGAGAGTCCAGGTTTCATGC   | 59.3 | 55   | 20    |
| Lu2188  | 1 | p2 | (TA)9    | 2 | 373  | 375 |     |     |     |     | Lu2188F | TGGAGCTAAATAAGGAGAGTGTG | 57.7 | 43.5 | 19+23 |
|         |   |    |          |   |      |     |     |     |     |     | Lu2188R | TTGCAGCAGACGTGGTTAAG    | 60   | 50   | 20    |
| Lu2189  | 1 | p3 | (TAC)8   | 2 | 366  | 369 |     |     |     |     | Lu2189F | GGTTTCGATCGATTGTACCTTTC | 61   | 43.5 | 19+23 |
|         |   |    |          |   |      |     |     |     |     |     | Lu2189R | ACGGAGAGAGGAGGAGGAAG    | 59.9 | 60   | 20    |
| Lu2193  | 1 | p2 | (TA)9    | 2 | 193  | 197 |     |     |     |     | Lu2193F | TGCACGGAAGAGTTCATCAT    | 59.2 | 45   | 19+20 |
|         |   |    |          |   |      |     |     |     |     |     | Lu2193R | TTGTTGTTCTTGTTGCTGCTG   | 60.1 | 42.9 | 21    |
| Lu2194  | 1 | p2 | (AT)22   | 6 | 277  | 279 | 281 | 283 | 285 | 301 | Lu2194F | AACCTTCAACCCAGTCTCC     | 60.3 | 55   | 19+20 |
|         |   |    |          |   |      |     |     |     |     |     | Lu2194R | CATCCTACCATGTGGCTTCC    | 60.3 | 55   | 20    |
| Lu2195  | 1 | p2 | (TA)9    | 2 | 375  | 417 |     |     |     |     | Lu2195F | CACTATCTCATGCCTTCCAG    | 59.7 | 52.4 | 19+21 |
|         |   |    |          |   |      |     |     |     |     |     | Lu2195R | CGGCAAGTCATTCATCTGTC    | 59.2 | 50   | 20    |
| Lu2196  | 1 | p3 | (TCA)6   | 2 | null | 292 |     |     |     |     | Lu2196F | GGAGATTGCTGATGATTTTGC   | 59.7 | 42.9 | 19+21 |
|         |   |    |          |   |      |     |     |     |     |     | Lu2196R | TTACCCGCGTTTCACTTTTC    | 60.1 | 45   | 20    |
| Lu2197  | 1 | p3 | (TCT)6   | 2 | 277  | 286 |     |     |     |     | Lu2197F | ACATCAGCATCTCCCCACTC    | 60.1 | 55   | 19+20 |
|         |   |    |          |   |      |     |     |     |     |     | Lu2197R | GGATTCTGAAGGCGATTGAG    | 59.8 | 50   | 20    |
| Lu2203  | 1 | p2 | (AT)12   | 2 | 381  | 383 |     |     |     |     | Lu2203F | TTGGAGTTTTTCATGCTTACC   | 60.1 | 42.9 | 19+21 |
|         |   |    |          |   |      |     |     |     |     |     | Lu2203R | GCATGCAAATTCGATCCAC     | 60   | 47.4 | 19    |

|         |   |    |                      |   |     |     |     |     |         |                        |                            |                      |       |       |       |
|---------|---|----|----------------------|---|-----|-----|-----|-----|---------|------------------------|----------------------------|----------------------|-------|-------|-------|
| Lu2206  | 1 | p2 | (AT)11               | 4 | 326 | 328 | 330 | 332 | Lu2206F | GGGAGATTTTTGGTTGTGGTG  | 60.2                       | 50                   | 19+20 |       |       |
|         |   |    |                      |   |     |     |     |     | Lu2206R | TTTGGACGTTAGTCCACATCTC | 59.1                       | 45.5                 | 22    |       |       |
| Lu2207  | 1 | p2 | (AT)9                | 3 | 258 | 260 | 262 |     | Lu2207F | GCGTGTGAAAACAGCAAAAG   | 59.5                       | 45                   | 19+20 |       |       |
|         |   |    |                      |   |     |     |     |     | Lu2207R | GGTCCATGCTCGGTTTAGTC   | 59.6                       | 55                   | 20    |       |       |
| Lu2208a | 2 | p3 | (GAA)6               | 2 | 206 | 209 |     |     | Lu2208F | TCTGAGTGGTCTGGCTTGG    | 60                         | 57.9                 | 19+19 |       |       |
| Lu2208b |   |    |                      | 2 | 193 | 199 |     |     | Lu2208R | CTCCCAGCAATCAAATCTCC   | 59.6                       | 50                   | 20    |       |       |
| Lu2209  | 1 | p3 | (GAA)6               | 2 | 336 | 339 |     |     | Lu2209F | TTGTTTCCCAATTCATGTG    | 59.2                       | 40                   | 19+20 |       |       |
|         |   |    |                      |   |     |     |     |     | Lu2209R | CACGTTTGGTGCCCTTTATC   | 60.4                       | 50                   | 20    |       |       |
| Lu2214  | 1 | p2 | (AG)9                | 2 | 340 | 344 |     |     | Lu2214F | TGGATTGGGAAATGAACAGG   | 60.7                       | 45                   | 19+20 |       |       |
|         |   |    |                      |   |     |     |     |     | Lu2214R | AGGCAAAAACACTCGAAACG   | 60.3                       | 45                   | 20    |       |       |
| Lu2216  | 1 | p2 | (AT)15               | 5 | 362 | 364 | 366 | 368 | 376     | Lu2216F                | CACGCTACGTACAAATGATATCTCTC | 60.4                 | 42.3  | 19+26 |       |
|         |   |    |                      |   |     |     |     |     | Lu2216R | CCATTCCTCCAAGCAACAAG   | 60.6                       | 50                   | 20    |       |       |
| Lu2217  | 1 | p2 | (AT)9                | 4 | 310 | 312 | 314 | 316 |         | Lu2217F                | AGTAAAATGAAAGCGCGAGA       | 57.8                 | 40    | 19+20 |       |
|         |   |    |                      |   |     |     |     |     | Lu2217R | TAAGATTTTTGCCTCCGTGT   | 57.4                       | 40                   | 20    |       |       |
| Lu2219  | 1 | p3 | (CAA)12              | 2 | 385 | 387 |     |     |         | Lu2219F                | TCAGTTGGCTAGAGCGTGTG       | 60.2                 | 55    | 19+20 |       |
|         |   |    |                      |   |     |     |     |     | Lu2219R | TGGTTCAACATGGAATGCAG   | 60.5                       | 45                   | 20    |       |       |
| Lu2220  | 1 | p3 | (CTC)8               | 2 | 275 | 284 |     |     |         | Lu2220F                | CTCCGCCAATACAAAACACC       | 60.4                 | 50    | 19+20 |       |
|         |   |    |                      |   |     |     |     |     | Lu2220R | GCAAGACCTCCGTTATGGAC   | 59.6                       | 55                   | 20    |       |       |
| Lu2223  | 1 | p3 | (TGA)6               | 2 | 228 | 237 |     |     |         | Lu2223F                | AGTGTATGTGCCGGCTGTG        | 60.8                 | 57.9  | 19+19 |       |
|         |   |    |                      |   |     |     |     |     | Lu2223R | TGGACCGGACCTCAGTAAAG   | 60.1                       | 55                   | 20    |       |       |
| Lu2230  | 1 | c  | (AT)13agtccacc(AT)10 | 4 | 314 | 316 | 318 | 320 |         | Lu2230F                | GGAGACTCAGAGCGGATTAGC      | 60.5                 | 57.1  | 19+21 |       |
|         |   |    |                      |   |     |     |     |     | Lu2230R | AAATGCTTGGATCCTTTTGC   | 59.2                       | 40                   | 20    |       |       |
| Lu2233  | 1 | p3 | (AAT)12              | 3 | 209 | 212 | 215 |     |         | Lu2233F                | TTAAGGAAACGTCTCGTCCAG      | 59.4                 | 47.6  | 19+21 |       |
|         |   |    |                      |   |     |     |     |     | Lu2233R | CCACCCCTAGGACTGAATAATG | 59.7                       | 50                   | 22    |       |       |
| Lu2234  | 1 | p3 | (AGG)7               | 2 | 299 | 302 |     |     |         | Lu2234F                | TGGTATCGAAGGAGCCAAAG       | 60.2                 | 50    | 19+20 |       |
|         |   |    |                      |   |     |     |     |     | Lu2234R | ACGACTTGATTCCCAGATGC   | 60.1                       | 50                   | 20    |       |       |
| Lu2235  | 1 | p2 | (AT)11               | 6 | 236 | 238 | 240 | 242 | 244     | 246                    | Lu2235F                    | TTGTCCAAACCAACCAAGTG | 59.4  | 45    | 19+20 |
|         |   |    |                      |   |     |     |     |     |         | Lu2235R                | GACCACCGATTCTAACTCGAAC     | 60                   | 50    | 22    |       |
| Lu2237  | 1 | p3 | (GAA)9               | 3 | 255 | 264 | 267 |     |         | Lu2237F                | GACGGAGGAAAACAATCAGTG      | 59.6                 | 47.6  | 19+21 |       |
|         |   |    |                      |   |     |     |     |     | Lu2237R | GAAGAGAAGGGAGGGACCTG   | 60.2                       | 60                   | 20    |       |       |
| Lu2239  | 1 | p3 | (TCT)9               | 2 | 380 | 392 |     |     |         | Lu2239F                | AGCCACTCAATTTGCGAAAC       | 60.3                 | 45    | 19+20 |       |
|         |   |    |                      |   |     |     |     |     | Lu2239R | CTGTTCTCCCTGAAACGAG    | 59.8                       | 55                   | 20    |       |       |
| Lu2241  | 1 | p2 | (AT)10               | 3 | 351 | 353 | 355 |     |         | Lu2241F                | AAGACAGACCATCCAAACTCG      | 59.2                 | 47.6  | 19+21 |       |
|         |   |    |                      |   |     |     |     |     | Lu2241R | ACTGATCAAGCAGGGAATCG   | 60.2                       | 50                   | 20    |       |       |
| Lu2242  | 1 | p2 | (AG)9                | 2 | 296 | 298 |     |     |         | Lu2242F                | CACAGGGGTCCAGTTCTCAC       | 60.6                 | 60    | 19+20 |       |
|         |   |    |                      |   |     |     |     |     | Lu2242R | AGCAGCTGTTCTGAGATG     | 60.6                       | 55                   | 20    |       |       |
| Lu2246  | 1 | p2 | (TA)9                | 2 | 381 | 383 |     |     |         | Lu2246F                | TTTGGTAGAGGCACCGTAGC       | 60.3                 | 55    | 19+20 |       |
|         |   |    |                      |   |     |     |     |     | Lu2246R | TCCCCTGTTCTGAGCATAG    | 60.2                       | 55                   | 20    |       |       |
| Lu2247  | 1 | p2 | (TA)16               | 5 | 244 | 278 | 280 | 282 | 284     | Lu2247F                | GAACAACGACCCATTTGGAC       | 60.2                 | 50    | 19+20 |       |
|         |   |    |                      |   |     |     |     |     | Lu2247R | AGAATGGAATTGGGGGAAAG   | 60.1                       | 45                   | 20    |       |       |
| Lu2248a | 2 | p4 | (AAAG)5              | 2 | 301 | 305 |     |     |         | Lu2248F                | GGGTAACCAACCCCAAAAC        | 60.3                 | 50    | 19+20 |       |
| Lu2248b |   |    |                      | 2 | 276 | 284 |     |     |         | Lu2248R                | CACATTTCTTGGCCTTCTC        | 59.7                 | 50    | 20    |       |

|         |   |    |         |   |      |         |         |                          |      |      |       |
|---------|---|----|---------|---|------|---------|---------|--------------------------|------|------|-------|
| Lu2250  | 1 | p2 | (AT)11  | 2 | 279  | 283     | Lu2250F | AGAAGGAGGGTTTCGGGTATG    | 60.3 | 55   | 19+20 |
|         |   |    |         |   |      |         | Lu2250R | TGTAGCTGCCCCAGAAAATC     | 60.2 | 50   | 20    |
| Lu2251  | 1 | p3 | (ATA)10 | 3 | null | 201 207 | Lu2251F | AGCGGCCTGTACATAATTGG     | 60   | 50   | 19+20 |
|         |   |    |         |   |      |         | Lu2251R | GGAAGAAGTCGAAGCTGTGC     | 60.1 | 55   | 20    |
| Lu2252  | 1 | p3 | (GGA)7  | 2 | 192  | 198     | Lu2252F | GGGTATGGCAGTGGATCG       | 59.9 | 61.1 | 19+18 |
|         |   |    |         |   |      |         | Lu2252R | GCCTGCTGCATCTTTATTCC     | 59.8 | 50   | 20    |
| Lu2255  | 1 | p3 | (TCT)9  | 2 | 196  | 202     | Lu2255F | GAGCTTCGGTTAGGCATTTG     | 59.8 | 50   | 19+20 |
|         |   |    |         |   |      |         | Lu2255R | CAAGGAATGCTTCATCGTTTG    | 60.6 | 42.9 | 21    |
| Lu2256  | 1 | p3 | (AAG)16 | 2 | 266  | 284     | Lu2256F | ATCATTGTTGCGTTGATTGG     | 59.4 | 40   | 19+20 |
|         |   |    |         |   |      |         | Lu2256R | CTGTGCAGGTTGTCATTTGG     | 60.2 | 50   | 20    |
| Lu2257a | 2 | p2 | (AT)10  | 2 | 359  | 361     | Lu2257F | CCATATCAATTGGGCATCG      | 59.7 | 47.4 | 19+19 |
| Lu2257b |   |    |         | 3 | 335  | 337 339 | Lu2257R | TCCAATCCACGAAAAGAAGG     | 60   | 45   | 20    |
| Lu2258  | 1 | p2 | (AT)9   | 2 | 374  | 376     | Lu2258F | TTCACATTGCACATGATTCCG    | 59.1 | 40   | 19+20 |
|         |   |    |         |   |      |         | Lu2258R | AGCTTTTCCATTCCATTTCCG    | 59.2 | 40   | 20    |
| Lu2259  | 1 | p3 | (ATT)6  | 2 | 263  | 266     | Lu2259F | ACTGCCTTTCTCCTCAAACG     | 59.5 | 50   | 19+20 |
|         |   |    |         |   |      |         | Lu2259R | AGATTGGTGAAATCGGATGC     | 59.9 | 45   | 20    |
| Lu2260  | 1 | p3 | (GAA)7  | 2 | 284  | 287     | Lu2260F | CAGGTGATGTGTGGGTTTTG     | 59.8 | 50   | 19+20 |
|         |   |    |         |   |      |         | Lu2260R | AGAAGTCGATCGGCTAATGG     | 59.3 | 50   | 20    |
| Lu2262  | 1 | p3 | (TAA)8  | 3 | 186  | 189 192 | Lu2262F | GGCAGTTTTTGTCTCTTTGACC   | 60.2 | 45.5 | 19+22 |
|         |   |    |         |   |      |         | Lu2262R | AAAAAGGAAGGTGGGTTTGC     | 60.3 | 45   | 20    |
| Lu2264a | 2 | p2 | (TC)11  | 2 | 313  | 315     | Lu2264F | AGAGGAGCGCTGAGATTTTG     | 59.7 | 50   | 19+20 |
| Lu2264b |   |    |         | 2 | 290  | 292     | Lu2264R | CGGCACAACAAAGGATTAGG     | 60.5 | 50   | 20    |
| Lu2265  | 1 | p2 | (AG)14  | 2 | null | 215     | Lu2265F | CATCGTCAGAAGCAGAATGG     | 59.4 | 50   | 19+20 |
|         |   |    |         |   |      |         | Lu2265R | TCAGTATGTGGGGATGAAAGC    | 59.9 | 47.6 | 21    |
| Lu2266a | 2 | p3 | (GAT)9  | 2 | 364  | 373     | Lu2266F | TGAGCATTTCAGCAAGGTTTG    | 60   | 45   | 19+20 |
| Lu2266b |   |    |         | 3 | 340  | 343 346 | Lu2266R | TAAAAGGCCGCTGATCACTC     | 60.4 | 50   | 20    |
| Lu2268a | 2 | p2 | (AT)13  | 2 | 322  | 330     | Lu2268F | GAACATATGTAACGGGTGAAACAC | 59.6 | 41.7 | 19+24 |
| Lu2268b |   |    |         | 2 | 370  | 372     | Lu2268R | AACGATCTCAAGGCTCAGTTC    | 58.5 | 47.6 | 21    |
| Lu2270  | 1 | p3 | (CTT)8  | 2 | 348  | 354     | Lu2270F | TGCAGAAAAACCCCATACC      | 59.8 | 45   | 19+20 |
|         |   |    |         |   |      |         | Lu2270R | GAAGAGGACAACGGATGAGG     | 59.7 | 55   | 20    |
| Lu2272  | 1 | p3 | (GAA)8  | 2 | 371  | 377     | Lu2272F | ATTCTCCGACGAACTCAACG     | 60.3 | 50   | 19+20 |
|         |   |    |         |   |      |         | Lu2272R | ATGAACCTTGCTGGAGAACG     | 60.3 | 50   | 20    |
| Lu2274  | 1 | p3 | (TTG)6  | 2 | 249  | 255     | Lu2274F | GGTCTCCTTGAGCCTAGAACC    | 59.3 | 57.1 | 19+21 |
|         |   |    |         |   |      |         | Lu2274R | CAAACTCCACGAGACATGG      | 59.1 | 50   | 20    |
| Lu2275  | 1 | p3 | (CAG)6  | 2 | 291  | 297     | Lu2275F | GCAGCAGCATAGTGAAATGC     | 59.6 | 50   | 19+20 |
|         |   |    |         |   |      |         | Lu2275R | ATTCGACTGTGGGAGTGAGG     | 60.1 | 55   | 20    |
| Lu2278  | 1 | p2 | (TA)9   | 2 | 361  | 365     | Lu2278F | GCTCCTTGATGCCCTTGTC      | 59.7 | 55   | 19+20 |
|         |   |    |         |   |      |         | Lu2278R | TTACACGGCAAAGCTGTCTG     | 60   | 50   | 20    |
| Lu2279  | 1 | p3 | (TAA)10 | 3 | 204  | 210 216 | Lu2279F | TTCAAGGAAGGGAGTATTCTGG   | 59.6 | 45.5 | 19+22 |
|         |   |    |         |   |      |         | Lu2279R | CCAACACTATAAACAAAGTCGTGC | 59.1 | 40   | 25    |
| Lu2284  | 1 | p2 | (TA)11  | 2 | 248  | 252     | Lu2284F | AAGAGAGGGTTGGGGTATGG     | 60.2 | 55   | 19+20 |
|         |   |    |         |   |      |         | Lu2284R | ATGGTTGCCAAAATGAGAGG     | 59.9 | 45   | 20    |

|        |   |    |              |   |     |     |         |                           |                           |         |                            |                        |         |                       |       |      |       |
|--------|---|----|--------------|---|-----|-----|---------|---------------------------|---------------------------|---------|----------------------------|------------------------|---------|-----------------------|-------|------|-------|
| Lu2286 | 1 | p2 | (AT)11       | 3 | 364 | 366 | 368     | Lu2286F                   | GACAAATGTGGGGATCTTCG      | 60.3    | 50                         | 19+20                  |         |                       |       |      |       |
|        |   |    |              |   |     |     |         | Lu2286R                   | ATTGTTTCCTCTTGCCATCG      | 60.1    | 45                         | 20                     |         |                       |       |      |       |
| Lu2287 | 1 | p3 | (CAA)6       | 2 | 197 | 200 | Lu2287F | AGCATCTCTCCATCTTCCTCAC    | 59.8                      | 50      | 19+22                      |                        |         |                       |       |      |       |
|        |   |    |              |   |     |     | Lu2287R | GAGTGTCGGACCAAAGGTTTC     | 59.6                      | 55      | 20                         |                        |         |                       |       |      |       |
| Lu2288 | 1 | p2 | (AT)10       | 5 | 247 | 249 | 251     | 253                       | 255                       | Lu2288F | CACGATTGGATAACATCATGG      | 58.7                   | 42.9    | 19+21                 |       |      |       |
|        |   |    |              |   |     |     |         | Lu2288R                   | CCACCGGAATTATTGTTGC       | 58.8    | 47.4                       | 19                     |         |                       |       |      |       |
| Lu2291 | 1 | p2 | (AT)10       | 2 | 363 | 365 | Lu2291F | CATGTTCCGAAAGGAGTACACA    | 60                        | 45.5    | 19+22                      |                        |         |                       |       |      |       |
|        |   |    |              |   |     |     | Lu2291R | GAGCCAAGAGGATCAAGTGG      | 59.8                      | 55      | 20                         |                        |         |                       |       |      |       |
| Lu2292 | 1 | p2 | (AT)20       | 8 | 342 | 350 | 354     | 358                       | 362                       | 366     | 368                        | 370                    | Lu2292F | TTGGTCGGTTTTTATGAGACG | 60    | 42.9 | 19+21 |
|        |   |    |              |   |     |     |         | Lu2292R                   | ATGGTTAGCTGGGGATCAAG      | 59      | 50                         | 20                     |         |                       |       |      |       |
| Lu2293 | 1 | p5 | (GTCTC)6     | 3 | 284 | 304 | 314     | Lu2293F                   | AGGTCACTCCATTCGGACAC      | 60      | 55                         | 19+20                  |         |                       |       |      |       |
|        |   |    |              |   |     |     | Lu2293R | CCTCGTCGTGGAGAATCATC      | 60.6                      | 55      | 20                         |                        |         |                       |       |      |       |
| Lu2295 | 1 | p2 | (TA)13       | 5 | 353 | 357 | 359     | 361                       | 367                       | Lu2295F | CATTATGTTTTTACTAACGCGGTTTC | 60.2                   | 36      | 19+25                 |       |      |       |
|        |   |    |              |   |     |     | Lu2295R | CAGTCCGTTTTTACTTCATGC     | 57.4                      | 42.9    | 21                         |                        |         |                       |       |      |       |
| Lu2296 | 1 | p2 | (TA)9        | 3 | 355 | 357 | 359     | Lu2296F                   | CCAGCAGATCGTTTTGTGAC      | 59.3    | 50                         | 19+20                  |         |                       |       |      |       |
|        |   |    |              |   |     |     | Lu2296R | ATTCCGCTCCATAACCAATC      | 58.9                      | 45      | 20                         |                        |         |                       |       |      |       |
| Lu2297 | 1 | p3 | (TGA)7       | 2 | 271 | 274 | Lu2297F | AAGCACGTATGGGGTGTAGC      | 60                        | 55      | 19+20                      |                        |         |                       |       |      |       |
|        |   |    |              |   |     |     | Lu2297R | CCAAACACAGACAAGATTGAGG    | 59.6                      | 45.5    | 22                         |                        |         |                       |       |      |       |
| Lu2331 | 1 | c  | (ATC)6(AGC)6 | 2 | 204 | 221 | Lu2331F | GAGTTCGGAGCAAACAGACC      | 59.9                      | 55      | 19+20                      |                        |         |                       |       |      |       |
|        |   |    |              |   |     |     | Lu2331R | GAAATCGGTCCTTCATCTCG      | 59.6                      | 50      | 20                         |                        |         |                       |       |      |       |
| Lu2332 | 1 | p6 | (CCTAAT)9    | 6 | 249 | 255 | 261     | 267                       | 279                       | 345     | Lu2332F                    | GAGGAAACCTAGCGGAGTAGC  | 59.5    | 57.1                  | 19+21 |      |       |
|        |   |    |              |   |     |     | Lu2332R | GAGCGCCTAAGGCTGAATC       | 60.1                      | 57.9    | 19                         |                        |         |                       |       |      |       |
| Lu2333 | 1 | p3 | (GAA)8       | 2 | 262 | 265 | Lu2333F | TTCTGAGATTCGAGCTGTGG      | 59.1                      | 50      | 19+20                      |                        |         |                       |       |      |       |
|        |   |    |              |   |     |     | Lu2333R | GGTTTCCACCCCTATACACG      | 59.2                      | 55      | 20                         |                        |         |                       |       |      |       |
| Lu2340 | 1 | p2 | (AT)11       | 3 | 272 | 276 | 278     | Lu2340F                   | AACATAGGGTTTAAAAGTTGTTGTG | 57.8    | 32                         | 19+25                  |         |                       |       |      |       |
|        |   |    |              |   |     |     | Lu2340R | TTTATGTTAAGAGTTACGGTTTGTG | 58                        | 30.8    | 26                         |                        |         |                       |       |      |       |
| Lu2341 | 1 | p3 | (CTT)7       | 2 | 351 | 354 | Lu2341F | CTGGTGGTTGATGCTAGTGC      | 59.3                      | 55      | 19+20                      |                        |         |                       |       |      |       |
|        |   |    |              |   |     |     | Lu2341R | AAATGGGGGACTTGATTTAGC     | 59.3                      | 42.9    | 21                         |                        |         |                       |       |      |       |
| Lu2342 | 1 | p2 | (AT)9        | 2 | 346 | 354 | Lu2342F | GGGGAGCTGAGTACAGTTGC      | 59.9                      | 60      | 19+20                      |                        |         |                       |       |      |       |
|        |   |    |              |   |     |     | Lu2342R | GGACCTAATGAAGAAGATTTCTGG  | 59.5                      | 41.7    | 24                         |                        |         |                       |       |      |       |
| Lu2344 | 1 | p3 | (AGA)13      | 2 | 296 | 307 | Lu2344F | GCTTGGATCTGAGCGAAGAG      | 60.2                      | 55      | 19+20                      |                        |         |                       |       |      |       |
|        |   |    |              |   |     |     | Lu2344R | AAACCAACGCAACAAAGGAG      | 60.1                      | 45      | 20                         |                        |         |                       |       |      |       |
| Lu2345 | 1 | p3 | (AGT)6       | 2 | 191 | 197 | Lu2345F | GGAAACGGACAAGAGAATTGG     | 60.8                      | 47.6    | 19+21                      |                        |         |                       |       |      |       |
|        |   |    |              |   |     |     | Lu2345R | CTCATAGCCAGGTGGACTGC      | 60.8                      | 60      | 20                         |                        |         |                       |       |      |       |
| Lu2346 | 1 | p2 | (AT)11       | 6 | 245 | 247 | 251     | 255                       | 265                       | 271     | Lu2346F                    | GAAAAGCAAAGAAGCTGAAAGG | 59.7    | 40.9                  | 19+22 |      |       |
|        |   |    |              |   |     |     | Lu2346R | TTGGCCAAAATCACTCACC       | 59.5                      | 47.4    | 19                         |                        |         |                       |       |      |       |
| Lu2347 | 1 | p3 | (ATA)7       | 3 | 360 | 363 | 366     | Lu2347F                   | ACGTCATGTCTCCACGTC        | 59.5    | 57.9                       | 19+19                  |         |                       |       |      |       |
|        |   |    |              |   |     |     | Lu2347R | GACGAGGGAAAGTTGTGCTC      | 59.9                      | 55      | 20                         |                        |         |                       |       |      |       |
| Lu2349 | 1 | p3 | (CTG)6       | 2 | 306 | 312 | Lu2349F | GTGGGTATTTGGAGCAGAGC      | 59.7                      | 55      | 19+20                      |                        |         |                       |       |      |       |
|        |   |    |              |   |     |     | Lu2349R | CAACTCCATAACCCCTCAGC      | 59.5                      | 55      | 20                         |                        |         |                       |       |      |       |
| Lu2351 | 1 | p2 | (TA)16       | 6 | 282 | 292 | 298     | 304                       | 310                       | 314     | Lu2351F                    | GGAAGCGAGTCATTCAATACG  | 59.7    | 47.6                  | 19+21 |      |       |
|        |   |    |              |   |     |     | Lu2351R | GCTGCGTAGCTACAATTTGATTAC  | 59.4                      | 41.7    | 24                         |                        |         |                       |       |      |       |

|         |   |    |          |   |      |     |     |     |     |         |                             |      |      |       |
|---------|---|----|----------|---|------|-----|-----|-----|-----|---------|-----------------------------|------|------|-------|
| Lu2352  | 1 | p3 | (TCA)7   | 2 | 183  | 198 |     |     |     | Lu2352F | CCCTCATTTCCAATGTCCTC        | 59.3 | 50   | 19+20 |
|         |   |    |          |   |      |     |     |     |     | Lu2352R | GCAAAGGAAATCTGAGCTTGA       | 59.6 | 42.9 | 21    |
| Lu2354  | 1 | p2 | (TA)13   | 5 | 315  | 317 | 319 | 321 | 325 | Lu2354F | AGTCAGCCCACTCTGAATCC        | 59.3 | 55   | 19+20 |
|         |   |    |          |   |      |     |     |     |     | Lu2354R | GGAGCCCTTTTCCCATTAAAC       | 59.8 | 50   | 20    |
| Lu2355  | 1 | p3 | (TGA)7   | 3 | 260  | 266 | 269 |     |     | Lu2355F | TACTCGGAGAGCGAGAAGC         | 59.9 | 55   | 19+20 |
|         |   |    |          |   |      |     |     |     |     | Lu2355R | TAATCTTTCACCCGGTTCCG        | 60.1 | 50   | 20    |
| Lu2357  | 1 | p2 | (TA)12   | 3 | 271  | 273 | 275 |     |     | Lu2357F | ATCGACGAGTGGGTACAAGG        | 60   | 55   | 19+20 |
|         |   |    |          |   |      |     |     |     |     | Lu2357R | AAAAGGAAGCAGATTAATGATTG     | 56.7 | 30.4 | 23    |
| Lu2358  | 1 | p3 | (CAT)9   | 3 | 301  | 304 | 316 |     |     | Lu2358F | ATGTCGTCCATCCAGTCTCC        | 59.9 | 55   | 19+20 |
|         |   |    |          |   |      |     |     |     |     | Lu2358R | GACACCCATAAGCATGATTGC       | 60.4 | 47.6 | 21    |
| Lu2360  | 1 | p3 | (CTA)6   | 2 | 294  | 300 |     |     |     | Lu2360F | ACGAATCCAGGCAAATCAAG        | 60.1 | 45   | 19+20 |
|         |   |    |          |   |      |     |     |     |     | Lu2360R | ATGATGGTAAGGGTGGCAAG        | 59.8 | 50   | 20    |
| Lu2361  | 1 | p2 | (AT)11   | 2 | null | 193 |     |     |     | Lu2361F | ACCAGGGGTAAGAGAGAACG        | 58.2 | 50   | 19+20 |
|         |   |    |          |   |      |     |     |     |     | Lu2361R | ACAAAGGCAAGTTGTGCAAG        | 59   | 45   | 20    |
| Lu2362  | 1 | p3 | (TCT)9   | 2 | 300  | 306 |     |     |     | Lu2362F | TGATCCTCTCCCTCACTCTCC       | 60.7 | 57.1 | 19+21 |
|         |   |    |          |   |      |     |     |     |     | Lu2362R | GAAGAGGGGCCAGAAATAGG        | 60   | 55   | 20    |
| Lu2364  | 1 | p2 | (AG)18   | 4 | 312  | 316 | 318 | 320 |     | Lu2364F | TGTTGCCTCATCTCCCTAGC        | 60.4 | 55   | 19+20 |
|         |   |    |          |   |      |     |     |     |     | Lu2364R | TTGCCGAATCTGCTTTTACC        | 60.2 | 45   | 20    |
| Lu2365  | 1 | p2 | (TC)20   | 5 | 298  | 300 | 304 | 306 | 308 | Lu2365F | AACTGAAGAACTCGGCGAAC        | 59.5 | 50   | 19+20 |
|         |   |    |          |   |      |     |     |     |     | Lu2365R | CGTAGCACCCATTCCATATTTAG     | 59.8 | 43.5 | 23    |
| Lu2366  | 1 | p4 | (TAAT)6  | 2 | 214  | 218 |     |     |     | Lu2366F | TGCGTAGTTGACACCGTGAG        | 60.9 | 55   | 19+20 |
|         |   |    |          |   |      |     |     |     |     | Lu2366R | ACACCATGGTCGACGAAATC        | 60.8 | 50   | 20    |
| Lu2370  | 1 | p2 | (TA)9    | 2 | 257  | 259 |     |     |     | Lu2370F | GGAAAACATGTGCGAGATTG        | 59.1 | 45   | 19+20 |
|         |   |    |          |   |      |     |     |     |     | Lu2370R | TGGCACTGAAGCATTTTACATC      | 60.1 | 40.9 | 22    |
| Lu2371a | 2 | p3 | (CTT)7   | 2 | 224  | 227 |     |     |     | Lu2371F | ATCTCAGCCCCTTGAAATCC        | 60.4 | 50   | 19+20 |
| Lu2371b |   |    |          | 2 | null | 217 |     |     |     | Lu2371R | CACCACCTCCTCATCGACTC        | 60.7 | 60   | 20    |
| Lu2373  | 1 | p2 | (TA)9    | 3 | 274  | 276 | 278 |     |     | Lu2373F | TTTTGGACCAACTCCACCTC        | 59.9 | 50   | 19+20 |
|         |   |    |          |   |      |     |     |     |     | Lu2373R | GATACTTAGCCCGCATCAGC        | 59.8 | 55   | 20    |
| Lu2374a | 2 | p3 | (TCA)11  | 2 | 210  | 213 |     |     |     | Lu2374F | GGAATGCCTTGAGTGTTTGG        | 60.5 | 50   | 19+20 |
| Lu2374b |   |    |          | 2 | 204  | 207 |     |     |     | Lu2374R | AAGACTATTTTCGGGCTTCTCC      | 60.1 | 45.5 | 22    |
| Lu2376  | 1 | p5 | (TGATG)5 | 2 | null | 223 |     |     |     | Lu2376F | TTGAAATCGTACCTCGTGTC        | 60   | 47.6 | 19+21 |
|         |   |    |          |   |      |     |     |     |     | Lu2376R | CGTCGACGGCTGAGTTATTC        | 60.8 | 55   | 20    |
| Lu2377  | 1 | p4 | (TGTT)5  | 2 | 283  | 285 |     |     |     | Lu2377F | GCGGAGCTAGGAATGTGAAG        | 60   | 55   | 19+20 |
|         |   |    |          |   |      |     |     |     |     | Lu2377R | AATTGTCAGGAGGCATCCAC        | 59.9 | 50   | 20    |
| Lu2382  | 1 | p2 | (TA)9    | 3 | 330  | 336 | 339 |     |     | Lu2382F | TCAAATTCTAATGTTGACCCTTACC   | 59.7 | 36   | 19+25 |
|         |   |    |          |   |      |     |     |     |     | Lu2382R | TCTTGACGGAACCAGGAAAC        | 60.1 | 50   | 20    |
| Lu2383  | 1 | p2 | (TC)9    | 2 | null | 306 |     |     |     | Lu2383F | AAACTGCTTTTGTGGTGGTG        | 60.1 | 42.9 | 19+21 |
|         |   |    |          |   |      |     |     |     |     | Lu2383R | TGAGGTAGTGAGGGCCAAAC        | 60.1 | 55   | 20    |
| Lu2387  | 1 | p2 | (AT)16   | 5 | 344  | 346 | 348 | 350 | 354 | Lu2387F | AGGCCTTTGTTTTGGTAGTG        | 58.3 | 42.9 | 19+21 |
|         |   |    |          |   |      |     |     |     |     | Lu2387R | GAACCAATGGGAATTTGTTTTT      | 59.6 | 36.4 | 22    |
| Lu2388  | 1 | p3 | (ATT)7   | 2 | 277  | 280 |     |     |     | Lu2388F | AACTGGTGAAAATTATACCATAGAACC | 59.1 | 33.3 | 19+27 |
|         |   |    |          |   |      |     |     |     |     | Lu2388R | ACTCAAACCGAACCAAG           | 60   | 50   | 20    |

|         |   |    |         |   |     |     |         |                        |                         |                      |                       |       |       |       |
|---------|---|----|---------|---|-----|-----|---------|------------------------|-------------------------|----------------------|-----------------------|-------|-------|-------|
| Lu2390  | 1 | p2 | (GA)9   | 2 | 255 | 267 | Lu2390F | CGGCGCTCTGTATTTCTCTC   | 60.1                    | 55                   | 19+20                 |       |       |       |
|         |   |    |         |   |     |     | Lu2390R | ATCCTCAGCCACCACAACCTC  | 60.1                    | 55                   | 20                    |       |       |       |
| Lu2392a | 2 | p2 | (TA)11  | 3 | 244 | 246 | 248     | Lu2392F                | TTCCCTGTCTCTCGAGTCTGA   | 60.1                 | 52.4                  | 19+21 |       |       |
| Lu2392b |   |    |         | 4 | 225 | 229 | 231     | 233                    | Lu2392R                 | CCGAGTTGCAGAAAGTCTCC | 60                    | 55    | 20    |       |
| Lu2393  | 1 | p2 | (TA)9   | 3 | 352 | 354 | 358     | Lu2393F                | CTTTGTCCTTGCAGTTGTGG    | 59.3                 | 50                    | 19+20 |       |       |
|         |   |    |         |   |     |     |         | Lu2393R                | AAGTGGCGGTCTATATGAAATG  | 58.2                 | 40.9                  | 22    |       |       |
| Lu2394a | 2 | p2 | (TC)17  | 3 | 360 | 362 | 364     | Lu2394F                | GGTTCCAATGAACCGAAGAC    | 59.4                 | 50                    | 19+20 |       |       |
| Lu2394b |   |    |         | 3 | 331 | 339 | 341     | Lu2394R                | CGGAATCTAGAAGCACAAGACC  | 60.3                 | 50                    | 22    |       |       |
| Lu2396  | 1 | p3 | (ATA)16 | 5 | 354 | 357 | 360     | 366                    | 372                     | Lu2396F              | CTACGGGACAAAGCAGTAACG | 59.8  | 52.4  | 19+21 |
|         |   |    |         |   |     |     |         | Lu2396R                | TGCATCTCATCGACTCATCC    | 59.8                 | 50                    | 20    |       |       |
| Lu2397  | 1 | p4 | (GAGT)5 | 2 | 325 | 329 | Lu2397F | TTTTCTTTGAGCTGCTTGTCC  | 59.6                    | 42.9                 | 19+21                 |       |       |       |
|         |   |    |         |   |     |     | Lu2397R | GGCCTCAATCGTCAGAAAAG   | 59.8                    | 50                   | 20                    |       |       |       |
| Lu2399  | 1 | p2 | (TA)9   | 3 | 313 | 321 | 323     | Lu2399F                | AACGGAGACGGAGAAGTACG    | 59.4                 | 55                    | 19+20 |       |       |
|         |   |    |         |   |     |     | Lu2399R | GCCACACACAACACTCG      | 59.7                    | 61.1                 | 18                    |       |       |       |
| Lu2400  | 1 | p3 | (TCT)6  | 2 | 245 | 248 | Lu2400F | CCAATTCCCCTTTAAACATAGG | 58.8                    | 40.9                 | 19+22                 |       |       |       |
|         |   |    |         |   |     |     | Lu2400R | TTATCCAGTTCGGTCTGCTG   | 58.9                    | 50                   | 20                    |       |       |       |
| Lu2401  | 1 | p3 | (TTA)8  | 2 | 221 | 227 | Lu2401F | TCGCAAATCTCAAATCATGC   | 59.8                    | 40                   | 19+20                 |       |       |       |
|         |   |    |         |   |     |     | Lu2401R | TGAAATGGCGTACACAAAGC   | 59.7                    | 45                   | 20                    |       |       |       |
| Lu2403  | 1 | p2 | (AT)12  | 4 | 321 | 323 | 325     | 327                    | Lu2403F                 | TCAACCTCTCTCCGATCCAC | 60.2                  | 55    | 19+20 |       |
|         |   |    |         |   |     |     | Lu2403R | ATTGAAAATGGACGGTGGTG   | 60.6                    | 45                   | 20                    |       |       |       |
| Lu2404  | 1 | p2 | (AT)18  | 2 | 291 | 301 | Lu2404F | GGTGTCCCACACCCTTCTC    | 60.4                    | 63.2                 | 19+19                 |       |       |       |
|         |   |    |         |   |     |     | Lu2404R | GCGCCTACTTGTTTGAATGG   | 60.6                    | 50                   | 20                    |       |       |       |
| Lu2405  | 1 | p2 | (AT)20  | 2 | 309 | 311 | Lu2405F | CAAGCAAAGCAACTTGAAACC  | 59.9                    | 42.9                 | 19+21                 |       |       |       |
|         |   |    |         |   |     |     | Lu2405R | TTACCACCGACAATGATTCG   | 59.4                    | 45                   | 20                    |       |       |       |
| Lu2408  | 1 | p3 | (CAT)6  | 3 | 292 | 298 | 301     | Lu2408F                | CACTCTTTTTGGTGGGTTTCG   | 60.5                 | 50                    | 19+20 |       |       |
|         |   |    |         |   |     |     | Lu2408R | AGAGGGAGCAAGAGGAGGAG   | 60.1                    | 60                   | 20                    |       |       |       |
| Lu2409  | 1 | p2 | (CT)15  | 3 | 277 | 279 | 283     | Lu2409F                | ACGGCCAATTTAAGAAGCTG    | 59.4                 | 45                    | 19+20 |       |       |
|         |   |    |         |   |     |     | Lu2409R | ATATCATAACCGCCGACCAG   | 59.8                    | 50                   | 20                    |       |       |       |
| Lu2410  | 1 | p3 | (CTT)6  | 2 | 287 | 290 | Lu2410F | AAGGACTGCCATCAACCAAC   | 60                      | 50                   | 19+20                 |       |       |       |
|         |   |    |         |   |     |     | Lu2410R | TCTCTCCCGTGTGATTGAAAG  | 60.2                    | 47.6                 | 21                    |       |       |       |
| Lu2411  | 1 | p3 | (GAA)11 | 2 | 339 | 336 | Lu2411F | TGGTGATGATGATGGGTAGC   | 59.3                    | 50                   | 19+20                 |       |       |       |
|         |   |    |         |   |     |     | Lu2411R | CTTCACCAAAGCAAACCTCTCC | 59                      | 47.6                 | 21                    |       |       |       |
| Lu2414  | 1 | p3 | (GGA)7  | 2 | 254 | 263 | Lu2414F | CACAGCTTCAGCAAGATAGGC  | 60.2                    | 52.4                 | 19+21                 |       |       |       |
|         |   |    |         |   |     |     | Lu2414R | TCCTCAACTCCCCACTATGC   | 60.1                    | 55                   | 20                    |       |       |       |
| Lu2418  | 1 | p4 | (AATT)5 | 2 | 244 | 248 | Lu2418F | GTGAACGTGGTGGAGAAAGG   | 60.5                    | 55                   | 19+20                 |       |       |       |
|         |   |    |         |   |     |     | Lu2418R | AAAATATATCACCGCCGTTCC  | 60.1                    | 42.9                 | 21                    |       |       |       |
| Lu2420  | 1 | p3 | (CAG)10 | 3 | 296 | 307 | 316     | Lu2420F                | TCCCACCTGGATAAAACTCG    | 59.9                 | 50                    | 19+20 |       |       |
|         |   |    |         |   |     |     | Lu2420R | CATCGCCATGGATGAGAAG    | 60.2                    | 52.6                 | 19                    |       |       |       |
| Lu2421  | 1 | p3 | (TAA)9  | 3 | 270 | 276 | 282     | Lu2421F                | TAACACCCACTCCCCTTCAC    | 59.8                 | 55                    | 19+20 |       |       |
|         |   |    |         |   |     |     | Lu2421R | TCAAAGGAGCCATCTCAACTC  | 59.4                    | 47.6                 | 21                    |       |       |       |
| Lu2422  | 1 | p3 | (TAA)13 | 3 | 264 | 267 | 270     | Lu2422F                | CTTGACAACCTGCTTCCCCTTAC | 60.2                 | 47.8                  | 19+23 |       |       |
|         |   |    |         |   |     |     | Lu2422R | TGTCACGTGAGTTTGGCTTC   | 59.9                    | 50                   | 20                    |       |       |       |



|         |   |    |          |   |      |     |     |     |     |         |                         |         |                           |       |      |       |
|---------|---|----|----------|---|------|-----|-----|-----|-----|---------|-------------------------|---------|---------------------------|-------|------|-------|
| Lu2424  | 1 | p5 | (CTCTT)7 | 5 | 295  | 300 | 305 | 315 | 350 | Lu2424F | TGGCCAAGTTCGTTGTAGTG    | 59.8    | 50                        | 19+20 |      |       |
|         |   |    |          |   |      |     |     |     |     | Lu2424R | TTGTACGCCTCAGCAGTGTC    | 60.1    | 55                        | 20    |      |       |
| Lu2425  | 1 | p4 | (ATAA)6  | 2 | 248  | 256 |     |     |     | Lu2425F | GTTTGGGAGGCAATATCAGG    | 59.4    | 50                        | 19+20 |      |       |
|         |   |    |          |   |      |     |     |     |     | Lu2425R | ACAATTCATGCAAACGCATC    | 59.6    | 40                        | 20    |      |       |
| Lu2426  | 1 | p5 | (AACCC)5 | 2 | 193  | 198 |     |     |     | Lu2426F | AATCCGGTCCGACCTTTATC    | 60.2    | 50                        | 19+20 |      |       |
|         |   |    |          |   |      |     |     |     |     | Lu2426R | TCGGTTTAGGGAAAGTAGAGAGC | 60.3    | 47.8                      | 23    |      |       |
| Lu2428  | 1 | p3 | (AAT)12  | 3 | 345  | 359 | 362 |     |     | Lu2428F | ATGCAGACTTCATCGCAGTG    | 60      | 50                        | 19+20 |      |       |
|         |   |    |          |   |      |     |     |     |     | Lu2428R | AATGATGGCACTGGGAACTC    | 59.9    | 50                        | 20    |      |       |
| Lu2429  | 1 | p3 | (ATA)6   | 2 | 272  | 275 |     |     |     | Lu2429F | ATCCAATGCCATCACAGC      | 59.5    | 47.4                      | 19+19 |      |       |
|         |   |    |          |   |      |     |     |     |     | Lu2429R | AGTGAGTGGTGGGTCTCTGG    | 60.2    | 60                        | 20    |      |       |
| Lu2430  | 1 | p3 | (CCG)6   | 2 | 240  | 243 |     |     |     | Lu2430F | GGAATCTCCTGAAATGCTTCC   | 60      | 47.6                      | 19+21 |      |       |
|         |   |    |          |   |      |     |     |     |     | Lu2430R | GGATGAGTCGGATTCAGAGG    | 59.6    | 55                        | 20    |      |       |
| Lu2431a | 3 | p4 | (GGAA)5  | 2 | null | 347 |     |     |     | Lu2431F | GGAGCAAGCAGAAGAGTTGC    | 60.3    | 55                        | 19+20 |      |       |
| Lu2431b |   |    |          | 2 | 322  | 329 |     |     |     | Lu2431R | CCTCAACTCCTCGTTTCAGTG   | 59.9    | 52.4                      | 21    |      |       |
| Lu2431c |   |    |          | 2 | null | 305 |     |     |     |         |                         |         |                           |       |      |       |
| Lu2432  | 1 | p4 | (GGTT)5  | 2 | 296  | 300 |     |     |     | Lu2432F | GTCTTTGGGGGAACATTGAG    | 59.4    | 50                        | 19+20 |      |       |
|         |   |    |          |   |      |     |     |     |     | Lu2432R | TCCTCGTTCAGCATGTCATC    | 59.8    | 50                        | 20    |      |       |
| Lu2433  | 1 | p2 | (TA)10   | 2 | 344  | 346 |     |     |     | Lu2433F | GAAGAGTGAAGGCGAGTTGC    | 60.1    | 55                        | 19+20 |      |       |
|         |   |    |          |   |      |     |     |     |     | Lu2433R | TTGACAGAGCCCTTGAAAGC    | 60.5    | 50                        | 20    |      |       |
| Lu2437  | 1 | p3 | (AGA)8   | 3 | 218  | 221 | 224 |     |     | Lu2437F | ACAAGTTCGACGACCTGACC    | 60.2    | 55                        | 19+20 |      |       |
|         |   |    |          |   |      |     |     |     |     | Lu2437R | AGAGCCACAAACAGCAACG     | 60      | 52.6                      | 19    |      |       |
| Lu2438  | 1 | p3 | (CAG)6   | 2 | 333  | 336 |     |     |     | Lu2438F | TGCAGAGAGTGGTGCAAGAG    | 60.3    | 55                        | 19+20 |      |       |
|         |   |    |          |   |      |     |     |     |     | Lu2438R | TGAGCTTGAGCTTGTGCTTG    | 60.5    | 50                        | 20    |      |       |
| Lu2439  | 1 | p3 | (AGA)6   | 2 | 213  | 222 |     |     |     | Lu2439F | CTTTCCGATGGAAAATCTCG    | 59.6    | 45                        | 19+20 |      |       |
|         |   |    |          |   |      |     |     |     |     | Lu2439R | AGGACACCTCGTTACCTTGC    | 59.2    | 55                        | 20    |      |       |
| Lu2440  | 1 | p3 | (AGT)7   | 7 | 215  | 218 | 221 | 227 | 230 | 233     | 236                     | Lu2440F | GACTGTAGAGGCAGGCAAGG      | 60    | 60   | 19+20 |
|         |   |    |          |   |      |     |     |     |     |         |                         | Lu2440R | TGAAGCAACGTACGGTATGG      | 59.6  | 50   | 20    |
| Lu2442  | 1 | p2 | (AT)12   | 4 | 279  | 281 | 283 | 285 |     |         |                         | Lu2442F | CACGCTTCGTTTTAGAAGTGG     | 59.9  | 47.6 | 19+21 |
|         |   |    |          |   |      |     |     |     |     |         |                         | Lu2442R | GTGTGTCAAACATACAAGAGTGAGC | 60.1  | 44   | 25    |
| Lu2443  | 1 | p2 | (AT)9    | 2 | 350  | 352 |     |     |     |         |                         | Lu2443F | CCAAGTAACCCGAAAGTCTCC     | 60    | 52.4 | 19+21 |
|         |   |    |          |   |      |     |     |     |     |         |                         | Lu2443R | GTCGTATCCATCAACCACTGC     | 60.4  | 52.4 | 21    |
| Lu2445  | 1 | p3 | (GAA)7   | 2 | 293  | 298 |     |     |     |         |                         | Lu2445F | ACATTTTCCGCCCTTCTCTC      | 60.6  | 50   | 19+20 |
|         |   |    |          |   |      |     |     |     |     |         |                         | Lu2445R | ACCCAGCAAGTAACCCAATG      | 59.9  | 50   | 20    |
| Lu2446  | 1 | p3 | (GAC)7   | 4 | 256  | 259 | 262 | 265 |     |         |                         | Lu2446F | ACATCGAATCCTGTGCAGTG      | 59.7  | 50   | 19+20 |
|         |   |    |          |   |      |     |     |     |     |         |                         | Lu2446R | GAGCTTCAATTGCCGAAAAG      | 60    | 45   | 20    |
| Lu2447  | 1 | p3 | (GAT)7   | 3 | 287  | 302 | 305 |     |     |         |                         | Lu2447F | TGCTCTGGCAACCGATAAG       | 60    | 52.6 | 19+19 |
|         |   |    |          |   |      |     |     |     |     |         |                         | Lu2447R | TGGTTAGCTTGGTCGGAATC      | 60.1  | 50   | 20    |
| Lu2448  | 1 | p3 | (GCT)10  | 2 | 356  | 368 |     |     |     |         |                         | Lu2448F | ATTGATATTGGCTCGGATGG      | 59.7  | 45   | 19+20 |
|         |   |    |          |   |      |     |     |     |     |         |                         | Lu2448R | GACTTGGCCTCCGATCTATG      | 59.7  | 55   | 20    |
| Lu2449  | 1 | p2 | (TA)11   | 3 | 191  | 193 | 195 |     |     |         |                         | Lu2449F | CATGTCCTTTTCATCAGTGTGG    | 59    | 47.6 | 19+21 |
|         |   |    |          |   |      |     |     |     |     |         |                         | Lu2449R | CTTGGCGATAACCTAAATTGG     | 58.6  | 42.9 | 21    |
| Lu2450  | 1 | p2 | (TC)10   | 3 | 285  | 287 | 291 |     |     |         |                         | Lu2450F | TGACAAGAAAGCACCAAACG      | 59.9  | 45   | 19+20 |

|         |   |    |                              |   |      |     |     |     |     |     |     |     |         |                                |      |      |       |
|---------|---|----|------------------------------|---|------|-----|-----|-----|-----|-----|-----|-----|---------|--------------------------------|------|------|-------|
| Lu2451  | 1 | p2 | (TC)9                        | 2 | 241  | 247 |     |     |     |     |     |     | Lu2450R | AGGGAGGCTTTTTCTCTTGG           | 59.8 | 50   | 20    |
|         |   |    |                              |   |      |     |     |     |     |     |     |     | Lu2451F | TCGGACCTCTTTTTCTTAGGG          | 59.7 | 47.6 | 19+21 |
|         |   |    |                              |   |      |     |     |     |     |     |     |     | Lu2451R | CCAACAACACCGAAGAACG            | 60.1 | 52.6 | 19    |
| Lu2453  | 1 | p3 | (TTC)7                       | 3 | 261  | 263 | 265 |     |     |     |     |     | Lu2453F | GATGAGGGGATGGTTTGTG            | 60.2 | 50   | 19+20 |
|         |   |    |                              |   |      |     |     |     |     |     |     |     | Lu2453R | CTCTCCTCCCTCCCTTCACT           | 59.8 | 60   | 20    |
| Lu2456  | 1 | p2 | (TA)13                       | 5 | 300  | 310 | 312 | 314 | 316 |     |     |     | Lu2456F | TGATGATAGACGAAATGTGTGG         | 58.5 | 40.9 | 19+22 |
|         |   |    |                              |   |      |     |     |     |     |     |     |     | Lu2456R | CGAAAATAGCTCCACAATGG           | 58.2 | 45   | 20    |
| Lu2457a | 2 | c  | (AG)15atagatagagagagag(AT)14 | 8 | 267  | 270 | 272 | 274 | 276 | 278 | 284 | 288 | Lu2457F | CTCCTTCTTAGCCGATTTTGC          | 60.3 | 47.6 | 19+21 |
| Lu2457b |   |    |                              | 3 | 245  | 249 | 251 |     |     |     |     |     | Lu2457R | GTCGATCGATTGGAGATTGC           | 60.6 | 50   | 20    |
| Lu2459  | 1 | p3 | (ACA)6                       | 3 | 258  | 270 | 273 |     |     |     |     |     | Lu2459F | GAGTCTCCATATAGTCAGGATGAGC      | 59.7 | 48   | 19+25 |
|         |   |    |                              |   |      |     |     |     |     |     |     |     | Lu2459R | TTTTGATTAGGAGCCGTTGG           | 60.1 | 45   | 20    |
| Lu2463  | 1 | p2 | (AT)20                       | 6 | 260  | 262 | 270 | 272 | 274 | 276 |     |     | Lu2463F | GGATTTGTCTGGTGGGTTTG           | 60.2 | 50   | 19+20 |
|         |   |    |                              |   |      |     |     |     |     |     |     |     | Lu2463R | TCATTTCAAGGGGAGCAAAG           | 60.2 | 45   | 20    |
| Lu2464  | 1 | p3 | (AGA)6                       | 2 | 272  | 275 |     |     |     |     |     |     | Lu2464F | TGATTGGGGGATTGGTAGAG           | 59.7 | 50   | 19+20 |
|         |   |    |                              |   |      |     |     |     |     |     |     |     | Lu2464R | CCACCTCACCGCTTTCTTC            | 60.8 | 57.9 | 19    |
| Lu2465  | 1 | p3 | (CAT)7                       | 2 | 334  | 349 |     |     |     |     |     |     | Lu2465F | GACCGAGCGAATTTCTTGAG           | 60   | 50   | 19+20 |
|         |   |    |                              |   |      |     |     |     |     |     |     |     | Lu2465R | GGCCTTATCCCTGACTCTCC           | 60   | 60   | 20    |
| Lu2466  | 1 | p2 | (CT)9                        | 2 | 247  | 249 |     |     |     |     |     |     | Lu2466F | ATCGCTTCAATCGGTCTCTG           | 60.4 | 50   | 19+20 |
|         |   |    |                              |   |      |     |     |     |     |     |     |     | Lu2466R | GAACATGGCGTTTTCCACTC           | 60.5 | 50   | 20    |
| Lu2467  | 1 | p2 | (CT)9                        | 2 | 309  | 319 |     |     |     |     |     |     | Lu2467F | TAGGGAATGCAGTTGCTGTG           | 59.9 | 50   | 19+20 |
|         |   |    |                              |   |      |     |     |     |     |     |     |     | Lu2467R | AGCAGCCAGCTGGTAGAGAC           | 59.8 | 60   | 20    |
| Lu2468  | 1 | p3 | (CTT)16                      | 2 | 437  | 443 |     |     |     |     |     |     | Lu2468F | CAGCGATTCTCTTTGTTGAGC          | 60.1 | 47.6 | 19+21 |
|         |   |    |                              |   |      |     |     |     |     |     |     |     | Lu2468R | CAAGTGATCTTGCATTTTCTGC         | 59.9 | 40.9 | 22    |
| Lu2469  | 1 | p3 | (GAT)6                       | 3 | 360  | 368 | 371 |     |     |     |     |     | Lu2469F | GATTTGATGTTGCCAGTTGC           | 59.1 | 45   | 19+20 |
|         |   |    |                              |   |      |     |     |     |     |     |     |     | Lu2469R | AGGCCTTTTTTCATTGACAGC          | 59.3 | 45   | 20    |
| Lu2472  | 1 | p3 | (CTT)11                      | 2 | 352  | 355 |     |     |     |     |     |     | Lu2472F | TAAATGTTTCCCGCCAAAAC           | 59.8 | 40   | 19+20 |
|         |   |    |                              |   |      |     |     |     |     |     |     |     | Lu2472R | TTTGAAATGGGAAGTGAGG            | 59.9 | 45   | 20    |
| Lu2473  | 1 | p2 | (AT)14                       | 6 | 362  | 368 | 372 | 376 | 378 | 380 |     |     | Lu2473F | GCAGTGTTTGAGGGTTATGG           | 58.1 | 50   | 19+20 |
|         |   |    |                              |   |      |     |     |     |     |     |     |     | Lu2473R | AATAACAAACAGCCCAACTCC          | 58.1 | 42.9 | 21    |
| Lu2474  | 1 | p2 | (TA)9                        | 2 | 290  | 300 |     |     |     |     |     |     | Lu2474F | CCTCATCCCAGACTTTGACC           | 59.5 | 55   | 19+20 |
|         |   |    |                              |   |      |     |     |     |     |     |     |     | Lu2474R | TCCTTAATGCTATGTCCTGAACC        | 59.5 | 43.5 | 23    |
| Lu2478  | 1 | p2 | (TA)9                        | 3 | 338  | 352 | 354 |     |     |     |     |     | Lu2478F | ATCCATGGCTTCTCCAACC            | 59.9 | 52.6 | 19+19 |
|         |   |    |                              |   |      |     |     |     |     |     |     |     | Lu2478R | CCCAAACAATCTCATCTTTGC          | 59.6 | 42.9 | 21    |
| Lu2479  | 1 | p2 | (AT)10                       | 2 | null | 338 |     |     |     |     |     |     | Lu2479F | CAAGGTGCCATGGTTAAGG            | 59   | 52.6 | 19+19 |
|         |   |    |                              |   |      |     |     |     |     |     |     |     | Lu2479R | GCTACGACACAGAGCAGTGG           | 59.6 | 60   | 20    |
| Lu2482  | 1 | p2 | (CT)18                       | 5 | 280  | 280 | 282 | 284 | 290 |     |     |     | Lu2482F | AGGCAGTCCTGCTATTCGTC           | 59.5 | 55   | 19+20 |
|         |   |    |                              |   |      |     |     |     |     |     |     |     | Lu2482R | GCCAATAGCCATGTGAGTAGG          | 59.6 | 52.4 | 21    |
| Lu2483  | 1 | p3 | (GAA)15                      | 3 | 214  | 217 | 233 |     |     |     |     |     | Lu2483F | TGTTGTAATATATGAAAAGAGAAATGGAAG | 60.4 | 26.7 | 19+30 |
|         |   |    |                              |   |      |     |     |     |     |     |     |     | Lu2483R | TTACAAGGTGGGGGAGTTTG           | 59.8 | 50   | 20    |
| Lu2485  | 1 | p2 | (TA)15                       | 4 | 190  | 192 | 194 | 198 |     |     |     |     | Lu2485F | TTCCTTCCCCTTGGTTTTG            | 59.9 | 45   | 19+20 |
|         |   |    |                              |   |      |     |     |     |     |     |     |     | Lu2485R | GACTCACTTCCATTGCGTCTC          | 59.9 | 52.4 | 21    |
| Lu2486  | 1 | p2 | (TC)18                       | 5 | 211  | 213 | 215 | 217 | 227 |     |     |     | Lu2486F | TTCACCATCACACCTTCACC           | 59.4 | 50   | 19+20 |

|         |   |    |         |   |      |     |         |                          |                       |                        |                        |                            |       |       |       |
|---------|---|----|---------|---|------|-----|---------|--------------------------|-----------------------|------------------------|------------------------|----------------------------|-------|-------|-------|
| Lu2489  | 1 | p3 | (ACA)8  | 2 | 320  | 332 | Lu2486R | TTTGTGGATGTTCTGGACCTG    | 60                    | 40.9                   | 22                     |                            |       |       |       |
|         |   |    |         |   |      |     | Lu2489F | CATGCATGCTAACACACAAGG    | 60.2                  | 47.6                   | 19+21                  |                            |       |       |       |
|         |   |    |         |   |      |     | Lu2489R | GATCTCGTCAGAAGGAAAAGTAGC | 59.9                  | 45.8                   | 24                     |                            |       |       |       |
| Lu2490  | 1 | p2 | (AT)11  | 2 | 192  | 206 | Lu2490F | GCCATGTGTGAAAGGTGATG     | 60                    | 50                     | 19+20                  |                            |       |       |       |
|         |   |    |         |   |      |     | Lu2490R | ATATGGTCAAGGGGCAAGTG     | 59.8                  | 50                     | 20                     |                            |       |       |       |
| Lu2492  | 1 | p3 | (GCT)6  | 2 | 322  | 328 | Lu2492F | CTCGAGTAGCAGTGGTGGTG     | 59.5                  | 60                     | 19+20                  |                            |       |       |       |
|         |   |    |         |   |      |     | Lu2492R | ATTCGAGGGCATCAGTGAAC     | 60.1                  | 50                     | 20                     |                            |       |       |       |
| Lu2493  | 1 | p3 | (AAG)6  | 2 | 340  | 343 | Lu2493F | TGCAACCTTATGAAGGTCAGG    | 60.1                  | 47.6                   | 19+21                  |                            |       |       |       |
|         |   |    |         |   |      |     | Lu2493R | AGGTGAATCAACTGGGTTGC     | 60                    | 50                     | 20                     |                            |       |       |       |
| Lu2495  | 1 | p2 | (AT)12  | 3 | 206  | 210 | 214     | Lu2495F                  | CCAACGCTGAATACAAGGTG  | 59.2                   | 50                     | 19+20                      |       |       |       |
|         |   |    |         |   |      |     |         | Lu2495R                  | AGGCTGAAGCTTTTGATTCCG | 59.6                   | 45                     | 20                         |       |       |       |
| Lu2496  | 1 | p3 | (ATA)6  | 2 | 322  | 334 | Lu2496F | ACGGTGAATACCGGTTACG      | 59.7                  | 50                     | 19+20                  |                            |       |       |       |
|         |   |    |         |   |      |     |         | Lu2496R                  | AAATTCGCATCCTCGACAAG  | 60.2                   | 45                     | 20                         |       |       |       |
| Lu2497  | 1 | p3 | (CCT)7  | 2 | 232  | 250 | Lu2497F | GGAGATAGCCGATCAGATGC     | 59.8                  | 55                     | 19+20                  |                            |       |       |       |
|         |   |    |         |   |      |     |         | Lu2497R                  | AAGCCAAAGGAAGAAGAGGTG | 59.9                   | 47.6                   | 21                         |       |       |       |
| Lu2500  | 1 | p3 | (CTT)10 | 2 | 206  | 209 | Lu2500F | ACCTGGGTCCAGAAATTGG      | 59.8                  | 52.6                   | 19+19                  |                            |       |       |       |
|         |   |    |         |   |      |     |         | Lu2500R                  | GAAGAGATGCGTCGTCAGC   | 59.7                   | 57.9                   | 19                         |       |       |       |
| Lu2501  | 1 | p2 | (GA)12  | 3 | 254  | 258 | 260     | Lu2501F                  | CCAGCTGATCCAGTTCTTCC  | 59.8                   | 55                     | 19+20                      |       |       |       |
|         |   |    |         |   |      |     |         | Lu2501R                  | GAGCGCACCAATTCAATTC   | 60.6                   | 45                     | 20                         |       |       |       |
| Lu2502  | 1 | p2 | (GA)16  | 2 | 224  | 228 | Lu2502F | TGCTCACCTTTTCCAAGTCAG    | 60.4                  | 47.6                   | 19+21                  |                            |       |       |       |
|         |   |    |         |   |      |     |         | Lu2502R                  | TGTTTGGGTGGGAGCTATTC  | 59.9                   | 50                     | 20                         |       |       |       |
| Lu2503  | 1 | p3 | (GAA)10 | 3 | 327  | 330 | 333     | Lu2503F                  | CCTCGCAATGAATGTGTGAC  | 60.1                   | 50                     | 19+20                      |       |       |       |
|         |   |    |         |   |      |     |         | Lu2503R                  | ACTTTGGTTGTTGGCCTTG   | 60                     | 45                     | 20                         |       |       |       |
| Lu2508  | 1 | p3 | (ATG)6  | 2 | 237  | 240 | Lu2508F | GGAGGATGGAAGCTATGCTG     | 59.8                  | 55                     | 19+20                  |                            |       |       |       |
|         |   |    |         |   |      |     |         | Lu2508R                  | CAACAGCAGCAGGAGTTGAC  | 59.6                   | 55                     | 20                         |       |       |       |
| Lu2509  | 1 | p2 | (AT)12  | 5 | 282  | 284 | 290     | 292                      | 294                   | Lu2509F                | AGAGGAAGGTGTGTCACTTGC  | 59.4                       | 52.4  | 19+21 |       |
|         |   |    |         |   |      |     |         |                          |                       | Lu2509R                | GTTTCGATGTTTGGGTTATTGC | 59.3                       | 42.9  | 21    |       |
| Lu2511  | 1 | p2 | (AG)11  | 3 | 204  | 208 | 212     | Lu2511F                  | GCCGAATTCTGCGGTATATG  | 60.4                   | 50                     | 19+20                      |       |       |       |
|         |   |    |         |   |      |     |         |                          |                       | Lu2511R                | ACAAAGGCGTTGGACAAGAG   | 60.3                       | 50    | 20    |       |
| Lu2512  | 1 | p2 | (AG)17  | 4 | 190  | 192 | 194     | 196                      | Lu2512F               | AAGCCAACAAGACAGAAGAACC | 59.8                   | 45.5                       | 19+22 |       |       |
|         |   |    |         |   |      |     |         |                          |                       | Lu2512R                | ATAGGGCGAGAAAGGCTAGG   | 59.8                       | 55    | 20    |       |
| Lu2513  | 1 | p2 | (AT)14  | 6 | null | 321 | 323     | 327                      | 331                   | 339                    | Lu2513F                | GGGACAATATTTCAAATCATAAAAGG | 60.2  | 30.8  | 19+26 |
|         |   |    |         |   |      |     |         |                          |                       |                        | Lu2513R                | GAAATTGATTGGATGTGGTTCC     | 60.4  | 40.9  | 22    |
| Lu2515  | 1 | p4 | (CTTT)5 | 2 | 316  | 321 | Lu2515F | GTGAATGGTTGGGAATCCTG     | 60.2                  | 50                     | 19+20                  |                            |       |       |       |
|         |   |    |         |   |      |     |         |                          |                       |                        | Lu2515R                | ACCATCGGCATACTCACCTC       | 60    | 55    | 20    |
| Lu2516a | 2 | p2 | (GA)11  | 4 | 326  | 330 | 332     | 340                      | Lu2516F               | ACACCACAAACCACCCTACAG  | 59.8                   | 52.4                       | 19+21 |       |       |
| Lu2516b |   |    |         | 3 | 312  | 326 | 332     | Lu2516R                  | TGGTTTTCCCAATTCAAAGC  | 59.9                   | 40                     | 20                         |       |       |       |
| Lu2517  | 1 | p3 | (GAA)7  | 2 | 197  | 203 | Lu2517F | AGCTGCTGGCTAAGATCGAG     | 59.9                  | 55                     | 19+20                  |                            |       |       |       |
|         |   |    |         |   |      |     |         |                          |                       |                        | Lu2517R                | AGCAGGGGAACTCAACAATG       | 60.1  | 50    | 20    |
| Lu2519  | 1 | p3 | (TAT)10 | 2 | 325  | 328 | Lu2519F | CCACGTTACCTTGTTGTTGG     | 58.9                  | 50                     | 19+20                  |                            |       |       |       |
|         |   |    |         |   |      |     |         |                          |                       |                        | Lu2519R                | TCATTTTTAGGCTGCTGTCCG      | 59.1  | 45    | 20    |
| Lu2520  | 1 | p3 | (TTA)6  | 2 | 206  | 218 | Lu2520F | TGGTGGCTGCTTTTGATTCC     | 59.8                  | 47.4                   | 19+19                  |                            |       |       |       |

|        |   |    |         |   |      |             |         |                           |      |      |       |
|--------|---|----|---------|---|------|-------------|---------|---------------------------|------|------|-------|
| Lu2522 | 1 | p3 | (AGA)6  | 2 | 334  | 340         | Lu2520R | TCGCTTGGGTTGGTTAATTC      | 59.9 | 45   | 20    |
|        |   |    |         |   |      |             | Lu2522F | AAAACGAACCGGTCTACTCG      | 59.2 | 50   | 19+20 |
| Lu2523 | 1 | p4 | (ATCT)5 | 3 | 278  | 286 294     | Lu2522R | TCGAATACGTCACGATCACC      | 59.5 | 50   | 20    |
|        |   |    |         |   |      |             | Lu2523F | CAATTTTCAGTGCGTGGTACG     | 60.2 | 50   | 19+20 |
| Lu2524 | 1 | p2 | (TC)10  | 2 | 350  | 356         | Lu2523R | TCCCCACTCTTTTTGTCTG       | 60.1 | 50   | 20    |
|        |   |    |         |   |      |             | Lu2524F | CTGGCCAAATTGAATAGTTGC     | 59.6 | 42.9 | 19+21 |
| Lu2527 | 1 | p3 | (CAG)8  | 2 | null | 273         | Lu2524R | GGTCATAAATGGGCTTGACC      | 59.2 | 50   | 20    |
|        |   |    |         |   |      |             | Lu2527F | CCACCATACAGCATCACTGC      | 60.1 | 55   | 19+20 |
| Lu2529 | 1 | p2 | (GA)10  | 3 | 271  | 276 279     | Lu2527R | TTTACCTTCATGAGGCAATGG     | 59.9 | 42.9 | 21    |
|        |   |    |         |   |      |             | Lu2529F | GACAGCCTGGAGCATAAACC      | 59.7 | 55   | 19+20 |
| Lu2530 | 1 | p3 | (GCG)8  | 2 | 206  | 210         | Lu2529R | TCGGACACAGTACACACACG      | 59.2 | 55   | 20    |
|        |   |    |         |   |      |             | Lu2530F | AATGCTCCGCGTAAAACAAC      | 60.1 | 45   | 19+20 |
| Lu2532 | 1 | p3 | (AGA)11 | 2 | 280  | 283         | Lu2530R | CGCTCACAAGAGGGAAAGAC      | 60   | 55   | 20    |
|        |   |    |         |   |      |             | Lu2532F | GGATAGAAGCTCACCGATGC      | 59.8 | 55   | 19+20 |
| Lu2533 | 1 | p2 | (AT)10  | 3 | 227  | 231 233     | Lu2532R | TTCAGAGCACCAGCAGAAAA      | 59.7 | 45   | 20    |
|        |   |    |         |   |      |             | Lu2533F | ATGAGAAAGGGGGCATTG        | 59.9 | 47.4 | 19+19 |
| Lu2534 | 1 | p3 | (ATA)8  | 3 | 279  | 312 318     | Lu2533R | CGAACCAAGCGAAGAAAAC       | 59.9 | 45   | 20    |
|        |   |    |         |   |      |             | Lu2534F | TCACATGGTACCCATTTTGG      | 59.1 | 45   | 19+20 |
| Lu2535 | 1 | p3 | (ATT)7  | 2 | 238  | 247         | Lu2534R | GTTGCCGATTGTTAGTTCAGG     | 59.6 | 47.6 | 21    |
|        |   |    |         |   |      |             | Lu2535F | ACGACATCCCTAAAACGAACC     | 60.2 | 47.6 | 19+21 |
| Lu2536 | 1 | p3 | (CCG)7  | 3 | 190  | 193 199     | Lu2535R | CATGCCATTGTTTTGATTGC      | 59.9 | 40   | 20    |
|        |   |    |         |   |      |             | Lu2536F | TCGATGTAACCTCCAACCTCG     | 60.1 | 47.6 | 19+21 |
| Lu2538 | 1 | p4 | (GTCA)5 | 2 | 352  | 364         | Lu2536R | ACTACGTCGTTGACGCTGTG      | 60   | 55   | 20    |
|        |   |    |         |   |      |             | Lu2538F | AGGACGATGAGGAGTTCAGTG     | 59.3 | 52.4 | 19+21 |
| Lu2540 | 1 | p3 | (TTC)7  | 2 | null | 287         | Lu2538R | CTCCTCCTGTGTCTGTCACG      | 59.4 | 60   | 20    |
|        |   |    |         |   |      |             | Lu2540F | CAGTTTCCCTCTTCGTACCG      | 59.7 | 55   | 19+20 |
| Lu2541 | 1 | p2 | (AT)10  | 2 | 356  | 366         | Lu2540R | GACATCCGCAGATGACTACG      | 59.3 | 55   | 20    |
|        |   |    |         |   |      |             | Lu2541F | GTAAGCTCCTGGCTTGATGC      | 60   | 55   | 19+20 |
| Lu2542 | 1 | p2 | (AG)12  | 2 | 337  | 339         | Lu2541R | CCTCCTTCAGCTACTCCTTCC     | 59.5 | 57.1 | 21    |
|        |   |    |         |   |      |             | Lu2542F | TTGGGAGGAGAACAAGAAGG      | 59.3 | 50   | 19+20 |
| Lu2543 | 1 | p3 | (AGA)6  | 2 | 240  | 243         | Lu2542R | ATTCAAAGGGCGATTACGTC      | 59   | 45   | 20    |
|        |   |    |         |   |      |             | Lu2543F | ATTGGGCTCTGTGGTAGCC       | 60.1 | 57.9 | 19+19 |
| Lu2544 | 1 | p2 | (TA)10  | 3 | 272  | 274 276     | Lu2543R | GCCCAAATCTTCTTAATTGTGC    | 60   | 40.9 | 22    |
|        |   |    |         |   |      |             | Lu2544F | GGTGTTCTGATAACGTGTTTCG    | 59.5 | 45.5 | 19+22 |
| Lu2545 | 1 | p3 | (ATT)6  | 3 | 330  | 336 339     | Lu2544R | AGAAAGGCCCTGATTCTGC       | 59.4 | 52.6 | 19    |
|        |   |    |         |   |      |             | Lu2545F | TGCTTTGCTAATTTATTATGGTGAG | 58.9 | 32   | 19+25 |
| Lu2546 | 1 | p2 | (AT)9   | 2 | 334  | 339         | Lu2545R | ATGGTAGCTGGTGGGTGAAC      | 59.9 | 55   | 20    |
|        |   |    |         |   |      |             | Lu2546F | AGAAGGAGAACGGGGCTTAG      | 59.8 | 55   | 19+20 |
| Lu2547 | 1 | p2 | (CT)9   | 4 | 256  | 260 266 274 | Lu2546R | TCCTGGGATTAACCAAAACC      | 60   | 42.9 | 21    |
|        |   |    |         |   |      |             | Lu2547F | TGAGAACAACCCGAAAGAC       | 60.1 | 50   | 19+20 |
| Lu2548 | 1 | p4 | (CTCC)6 | 2 | 341  | 345         | Lu2547R | ACCCCTGAGACCTCCTATGG      | 60.3 | 60   | 20    |
|        |   |    |         |   |      |             | Lu2548F | CACCTACATAATCAGCGTCGTC    | 59.7 | 50   | 19+22 |

|        |   |    |         |   |      |     |         |                        |                      |                        |         |                       |       |      |       |
|--------|---|----|---------|---|------|-----|---------|------------------------|----------------------|------------------------|---------|-----------------------|-------|------|-------|
| Lu2549 | 1 | p3 | (GAA)8  | 2 | 220  | 223 | Lu2548R | ATCGCAAGGAAAAACAGAGG   | 59.3                 | 45                     | 20      |                       |       |      |       |
|        |   |    |         |   |      |     | Lu2549F | CTAATTGCTCCTCCGATTGC   | 59.8                 | 50                     | 19+20   |                       |       |      |       |
|        |   |    |         |   |      |     | Lu2549R | CTAACAGTTGCGGGAAGTTTG  | 59.8                 | 47.6                   | 21      |                       |       |      |       |
| Lu2550 | 1 | p3 | (TTC)6  | 2 | 366  | 369 | Lu2550F | CCTTTCCTTCCTCCATTTCC   | 59.9                 | 50                     | 19+20   |                       |       |      |       |
|        |   |    |         |   |      |     | Lu2550R | GCATATTCCCTCACCTCAGC   | 59.7                 | 55                     | 20      |                       |       |      |       |
| Lu2551 | 1 | p3 | (AAT)8  | 2 | 275  | 278 | Lu2551F | TGCAGAAAGGAGGAGTACGG   | 60.4                 | 55                     | 19+20   |                       |       |      |       |
|        |   |    |         |   |      |     | Lu2551R | CATCAAAGGAAGCGAAGAGG   | 59.9                 | 50                     | 20      |                       |       |      |       |
| Lu2552 | 1 | p3 | (ATG)7  | 2 | 228  | 231 | Lu2552F | GGAAAACCAATCTGCTCGAC   | 59.7                 | 50                     | 19+20   |                       |       |      |       |
|        |   |    |         |   |      |     | Lu2552R | AGCAGAACCAACCCAGTAGG   | 59.2                 | 55                     | 20      |                       |       |      |       |
| Lu2553 | 1 | p2 | (CT)9   | 3 | 233  | 237 | 243     | Lu2553F                | CAACCCTCCAAAACACATCC | 60.2                   | 50      | 19+20                 |       |      |       |
|        |   |    |         |   |      |     | Lu2553R | TGGGAGAAATTATCCACTACGC | 60.3                 | 45.5                   | 22      |                       |       |      |       |
| Lu2554 | 1 | p3 | (AAG)7  | 2 | 198  | 200 | Lu2554F | TCGTCCGGCTCAGTAATGTTG  | 59.9                 | 50                     | 19+20   |                       |       |      |       |
|        |   |    |         |   |      |     | Lu2554R | AGAAGCAGCAGCTGGAGAAG   | 60                   | 55                     | 20      |                       |       |      |       |
| Lu2555 | 1 | p3 | (AAG)9  | 3 | 201  | 213 | 216     | Lu2555F                | TCCCGCTTTTAATGGTGTTT | 59.9                   | 45      | 19+20                 |       |      |       |
|        |   |    |         |   |      |     | Lu2555R | AATTGGAAGCTCGATTCACG   | 60.2                 | 45                     | 20      |                       |       |      |       |
| Lu2556 | 1 | p3 | (ATA)12 | 3 | 307  | 316 | 319     | Lu2556F                | TTTCAAAAAGGCTCCGACTC | 59.4                   | 45      | 19+20                 |       |      |       |
|        |   |    |         |   |      |     | Lu2556R | TTTTGCCCAAATTGTAAGTACG | 59.1                 | 36.4                   | 22      |                       |       |      |       |
| Lu2557 | 1 | p3 | (ATT)10 | 6 | 278  | 302 | 308     | 311                    | 338                  | 344                    | Lu2557F | AGGTTGTCTGTTGAAAGTTGG | 60    | 50   | 19+20 |
|        |   |    |         |   |      |     | Lu2557R | AAAGCTAGCTACCGCACCAC   | 59.5                 | 55                     | 20      |                       |       |      |       |
| Lu2560 | 1 | p2 | (GA)11  | 2 | null | 238 | Lu2560F | CGTGGCTACTAGCAATGTGG   | 59.4                 | 55                     | 19+20   |                       |       |      |       |
|        |   |    |         |   |      |     | Lu2560R | TCCTCATGTTTATTGCTTGC   | 59.8                 | 45                     | 20      |                       |       |      |       |
| Lu2561 | 1 | p3 | (GAA)6  | 3 | 331  | 334 | 337     | Lu2561F                | GCTGAGGAGTTGGGTGTAGC | 59.9                   | 60      | 19+20                 |       |      |       |
|        |   |    |         |   |      |     | Lu2561R | TCTTCCTTGGCTCTTCTTCG   | 59.7                 | 50                     | 20      |                       |       |      |       |
| Lu2563 | 1 | p3 | (GGA)8  | 2 | null | 395 | Lu2563F | GTTCCGGTGAAGTGAGAAGG   | 59.7                 | 55                     | 19+20   |                       |       |      |       |
|        |   |    |         |   |      |     | Lu2563R | AGAAGAAAAACCAAAGCACAGC | 59.9                 | 40.9                   | 22      |                       |       |      |       |
| Lu2564 | 1 | p2 | (TA)10  | 2 | 255  | 257 | Lu2564F | TTTCAGCTTCGATTGAGACG   | 59.1                 | 45                     | 19+20   |                       |       |      |       |
|        |   |    |         |   |      |     | Lu2564R | ATCCGTCCGAGGTAACAGTCC  | 59                   | 55                     | 20      |                       |       |      |       |
| Lu2565 | 1 | p2 | (TA)14  | 4 | 210  | 222 | 226     | 228                    | Lu2565F              | TTTGGGCTTCTACTTTCTCCTG | 59.9    | 45.5                  | 19+22 |      |       |
|        |   |    |         |   |      |     | Lu2565R | AACCAAGAGGCTTCATACGG   | 59.2                 | 50                     | 20      |                       |       |      |       |
| Lu2567 | 1 | p3 | (TAT)11 | 4 | 313  | 325 | 331     | 334                    | Lu2567F              | AACAAGACCTTGGCTTGGAG   | 59.3    | 50                    | 19+20 |      |       |
|        |   |    |         |   |      |     | Lu2567R | TCATCACCATCGAATGAACC   | 59.3                 | 45                     | 20      |                       |       |      |       |
| Lu2571 | 1 | p4 | (TCCT)6 | 2 | 190  | 194 | Lu2571F | GGTTGATTCAGACGGTCCTC   | 59.5                 | 55                     | 19+20   |                       |       |      |       |
|        |   |    |         |   |      |     | Lu2571R | TGTGATGAATTCTGCCAAGG   | 59.6                 | 45                     | 20      |                       |       |      |       |
| Lu2572 | 1 | p3 | (TCT)9  | 2 | 250  | 253 | Lu2572F | TTGAGGAATCGGAGATTTGG   | 60                   | 45                     | 19+20   |                       |       |      |       |
|        |   |    |         |   |      |     | Lu2572R | AGGAATGTTTCATCGGAGCAG  | 60.2                 | 50                     | 20      |                       |       |      |       |
| Lu2574 | 1 | p3 | (TTC)7  | 2 | 237  | 243 | Lu2574F | AAGAACGCCTCATGTCTTCC   | 59.3                 | 50                     | 19+20   |                       |       |      |       |
|        |   |    |         |   |      |     | Lu2574R | CCAGCCTATTTTCAGGATTCG  | 59.7                 | 50                     | 20      |                       |       |      |       |
| Lu2575 | 1 | p3 | (CTT)6  | 2 | 337  | 340 | Lu2575F | GTTCCGGCCATAATGTTCCAC  | 60.2                 | 50                     | 19+20   |                       |       |      |       |
|        |   |    |         |   |      |     | Lu2575R | CACAGTCATGCGAACTCCAC   | 60.3                 | 55                     | 20      |                       |       |      |       |
| Lu2576 | 1 | p3 | (GAA)9  | 2 | 362  | 365 | Lu2576F | TCAGGCGAAAGGTTGAATG    | 59.8                 | 47.4                   | 19+19   |                       |       |      |       |
|        |   |    |         |   |      |     | Lu2576R | CAATTTCTGGGTTTCCATCC   | 59.2                 | 45                     | 20      |                       |       |      |       |
| Lu2578 | 1 | p2 | (AT)14  | 6 | 177  | 187 | 191     | 193                    | 197                  | 205                    | Lu2578F | TGAGGGTGATCTCCACCAC   | 59.4  | 57.9 | 19+19 |

|        |   |    |         |   |     |     |     |     |         |                         |                             |      |         |                            |                         |      |      |       |
|--------|---|----|---------|---|-----|-----|-----|-----|---------|-------------------------|-----------------------------|------|---------|----------------------------|-------------------------|------|------|-------|
| Lu2580 | 1 | p2 | (AT)9   | 4 | 240 | 242 | 256 | 258 | Lu2578R | ATCATGAGTTGGCGTTTGG     | 59.5                        | 47.4 | 19      |                            |                         |      |      |       |
|        |   |    |         |   |     |     |     |     | Lu2580F | AAGGTCGCTACTATTCCAAAAGC | 60.2                        | 43.5 | 19+23   |                            |                         |      |      |       |
|        |   |    |         |   |     |     |     |     | Lu2580R | TCTTGTTTTGTTCGGACTATCG  | 60.1                        | 47.6 | 21      |                            |                         |      |      |       |
| Lu2582 | 1 | p2 | (AT)9   | 3 | 331 | 333 | 335 |     | Lu2582F | TTCCCCTCCATTTCTTCTCTC   | 59.6                        | 47.6 | 19+21   |                            |                         |      |      |       |
|        |   |    |         |   |     |     |     |     | Lu2582R | GCTCCACCATCCTTTTGAAC    | 59.5                        | 50   | 20      |                            |                         |      |      |       |
| Lu2583 | 1 | p3 | (ACC)7  | 2 | 313 | 315 |     |     | Lu2583F | ATCATCTTCTGCACCAACC     | 59.9                        | 50   | 19+20   |                            |                         |      |      |       |
|        |   |    |         |   |     |     |     |     | Lu2583R | GAGGAGGGAGCGTCTAAAGG    | 60.3                        | 60   | 20      |                            |                         |      |      |       |
| Lu2587 | 1 | p4 | (CTAG)5 | 2 | 301 | 306 |     |     | Lu2587F | TCGTAAGTGAAGTTCGAAAACC  | 60.6                        | 43.5 | 19+23   |                            |                         |      |      |       |
|        |   |    |         |   |     |     |     |     | Lu2587R | GGCCAGTAGTGTGGAGATGG    | 60.5                        | 60   | 20      |                            |                         |      |      |       |
| Lu2588 | 1 | p2 | (TA)11  | 2 | 328 | 338 |     |     | Lu2588F | CGGGTCCGAGACACTAAATC    | 59.5                        | 55   | 19+20   |                            |                         |      |      |       |
|        |   |    |         |   |     |     |     |     | Lu2588R | GGGGAGAAATGAATTGAGTTGA  | 60.3                        | 40.9 | 22      |                            |                         |      |      |       |
| Lu2589 | 1 | p2 | (AT)21  | 9 | 210 | 224 | 228 | 230 | 232     | 234                     | 236                         | 238  | 244     | Lu2589F                    | CTGTGCAGTGTGTTGTGAAAATG | 59.3 | 40.9 | 19+22 |
|        |   |    |         |   |     |     |     |     |         |                         |                             |      |         | Lu2589R                    | CAGCCAATGGTTGAATGATG    | 59.9 | 45   | 20    |
| Lu2592 | 1 | p3 | (AAT)6  | 2 | 292 | 295 |     |     |         | Lu2592F                 | CAATTTGGCCACTCGTATTTG       | 60.4 | 42.9    | 19+21                      |                         |      |      |       |
|        |   |    |         |   |     |     |     |     |         | Lu2592R                 | TGCACACTGAAATATGAGCCTAAC    | 60.5 | 41.7    | 24                         |                         |      |      |       |
| Lu2593 | 1 | p2 | (AG)14  | 2 | 362 | 364 |     |     |         | Lu2593F                 | CTCTTCCGCTTCTATCAAATCC      | 59.4 | 45.5    | 19+22                      |                         |      |      |       |
|        |   |    |         |   |     |     |     |     |         | Lu2593R                 | CATGATGCCTTTCATGTTGG        | 59.9 | 45      | 20                         |                         |      |      |       |
| Lu2597 | 1 | p2 | (TA)13  | 3 | 283 | 285 | 287 |     |         | Lu2597F                 | CTTTCCCACCATAATAATAATACCC   | 58.2 | 36      | 19+25                      |                         |      |      |       |
|        |   |    |         |   |     |     |     |     |         | Lu2597R                 | GATTTGGAAAAATAAGCATGTCC     | 58.9 | 34.8    | 23                         |                         |      |      |       |
| Lu2599 | 1 | p3 | (ACC)7  | 2 | 224 | 233 |     |     |         | Lu2599F                 | AAGTAGCAATACATTGTCAAAGTCTCA | 59.7 | 33.3    | 19+27                      |                         |      |      |       |
|        |   |    |         |   |     |     |     |     |         | Lu2599R                 | CCCTTCTCGATCACTTCCAG        | 59.8 | 55      | 20                         |                         |      |      |       |
| Lu2600 | 1 | p3 | (ATC)8  | 2 | 357 | 363 |     |     |         | Lu2600F                 | AGGTAAAAGTGGGCATGTCCG       | 60   | 50      | 19+20                      |                         |      |      |       |
|        |   |    |         |   |     |     |     |     |         | Lu2600R                 | CCAAATTCCTCTTGCTTTGC        | 59.8 | 45      | 20                         |                         |      |      |       |
| Lu2601 | 1 | p2 | (TA)10  | 2 | 348 | 350 |     |     |         | Lu2601F                 | GCTTCTGCTTCGATTCATCC        | 59.9 | 50      | 19+20                      |                         |      |      |       |
|        |   |    |         |   |     |     |     |     |         | Lu2601R                 | CTTCATCAATGGTTTCCAAGC       | 59.6 | 42.9    | 21                         |                         |      |      |       |
| Lu2602 | 1 | p3 | (AAG)7  | 2 | 288 | 291 |     |     |         | Lu2602F                 | ATAGCCCTCGGAGAAAAAGG        | 59.7 | 50      | 19+20                      |                         |      |      |       |
|        |   |    |         |   |     |     |     |     |         | Lu2602R                 | TTGTAGCTGAACCAACCAACC       | 60   | 47.6    | 21                         |                         |      |      |       |
| Lu2603 | 1 | p3 | (AGA)6  | 2 | 190 | 193 |     |     |         | Lu2603F                 | GAGCTTGCTAAGGTTGTTAAAAGG    | 59.9 | 41.7    | 19+24                      |                         |      |      |       |
|        |   |    |         |   |     |     |     |     |         | Lu2603R                 | ACACTTTAACGTACGGGTGAGG      | 60.3 | 50      | 22                         |                         |      |      |       |
| Lu2604 | 1 | p2 | (AT)10  | 2 | 273 | 275 |     |     |         | Lu2604F                 | CCAGCTTTCATCCCTACTGG        | 59.7 | 55      | 19+20                      |                         |      |      |       |
|        |   |    |         |   |     |     |     |     |         | Lu2604R                 | GGGCAATTGAACGGATAGAC        | 59.4 | 50      | 20                         |                         |      |      |       |
| Lu2605 | 1 | p2 | (AT)9   | 3 | 259 | 265 | 267 |     |         | Lu2605F                 | GTGAAGCTCGACACTTCTGC        | 58.8 | 55      | 19+20                      |                         |      |      |       |
|        |   |    |         |   |     |     |     |     |         | Lu2605R                 | GCGACTCATACCGTACATGG        | 59   | 55      | 20                         |                         |      |      |       |
| Lu2607 | 1 | p2 | (CT)10  | 3 | 232 | 236 | 238 |     |         | Lu2607F                 | AAAAGCATCAACCACACACG        | 59.6 | 45      | 19+20                      |                         |      |      |       |
|        |   |    |         |   |     |     |     |     |         | Lu2607R                 | TTCTTTTCCCGCTGATGG          | 59.7 | 50      | 18                         |                         |      |      |       |
| Lu2608 | 1 | p3 | (CTC)8  | 2 | 233 | 257 |     |     |         | Lu2608F                 | GTGGAGCGATTTTCTGATCC        | 59.6 | 50      | 19+20                      |                         |      |      |       |
|        |   |    |         |   |     |     |     |     |         | Lu2608R                 | CGAGAATGGAGGAGGTTCC         | 59.6 | 57.9    | 19                         |                         |      |      |       |
| Lu2609 | 1 | p3 | (CTC)8  | 2 | 301 | 307 |     |     |         | Lu2609F                 | TGCTTTCATTATGCCCTTCC        | 60   | 45      | 19+20                      |                         |      |      |       |
|        |   |    |         |   |     |     |     |     |         | Lu2609R                 | GCCATGAAAAAGTTTGCTCTG       | 59.9 | 42.9    | 21                         |                         |      |      |       |
| Lu2612 | 1 | p2 | (TA)14  | 7 | 283 | 285 | 289 | 295 | 297     | 299                     | 301                         |      |         | Lu2612F                    | ATCATCGAATCAGGCCAAAC    | 59.9 | 45   | 19+20 |
|        |   |    |         |   |     |     |     |     |         |                         |                             |      | Lu2612R | TGGTGAACGTACATACATTACACATC | 60                      | 38.5 | 26   |       |
| Lu2613 | 1 | p2 | (TC)12  | 2 | 400 | 402 |     |     |         | Lu2613F                 | TGAGGGGAAGAACAGAATGG        | 60   | 50      | 19+20                      |                         |      |      |       |

|        |   |    |           |   |     |     |     |     |         |                            |      |      |         |                      |      |    |       |
|--------|---|----|-----------|---|-----|-----|-----|-----|---------|----------------------------|------|------|---------|----------------------|------|----|-------|
| Lu2614 | 1 | p3 | (TTC)7    | 4 | 368 | 371 | 374 | 377 | Lu2613R | GCACAGACGACTAGTACCGAGA     | 59.6 | 54.5 | 22      |                      |      |    |       |
|        |   |    |           |   |     |     |     |     | Lu2614F | CTCCGCCTATTGTTCTTTTCC      | 60.1 | 47.6 | 19+21   |                      |      |    |       |
|        |   |    |           |   |     |     |     |     | Lu2614R | TCCCCCTACATTTCCCTCCTC      | 60.3 | 55   | 20      |                      |      |    |       |
| Lu2617 | 1 | p3 | (GGT)7    | 2 | 198 | 201 |     |     | Lu2617F | AACTGCACTTCTCCTTCTAGGG     | 59.1 | 50   | 19+22   |                      |      |    |       |
|        |   |    |           |   |     |     |     |     | Lu2617R | GAAACGATTATCCGGACCAG       | 59.4 | 50   | 20      |                      |      |    |       |
| Lu2618 | 1 | p2 | (TA)13    | 3 | 198 | 200 | 202 |     | Lu2618F | GTTTTGCCATGCTGACAGTG       | 60.3 | 50   | 19+20   |                      |      |    |       |
|        |   |    |           |   |     |     |     |     | Lu2618R | AATATCTCCCCATCAGCCATC      | 60.1 | 47.6 | 21      |                      |      |    |       |
| Lu2621 | 1 | p2 | (CT)9     | 2 | 291 | 293 |     |     | Lu2621F | GCTGGCAATAGCGAACTAGC       | 60.1 | 55   | 19+20   |                      |      |    |       |
|        |   |    |           |   |     |     |     |     | Lu2621R | CATGGGTGGTGTGGTTGTT        | 60.1 | 52.6 | 19      |                      |      |    |       |
| Lu2622 | 1 | p2 | (GA)15    | 2 | 320 | 324 |     |     | Lu2622F | TGCACCTATTTCCCTTCCAC       | 59.9 | 50   | 19+20   |                      |      |    |       |
|        |   |    |           |   |     |     |     |     | Lu2622R | GAGAATTCCAGTGAATCGCTAGT    | 58.9 | 43.5 | 23      |                      |      |    |       |
| Lu2624 | 1 | p3 | (CTT)6    | 3 | 332 | 341 | 344 |     | Lu2624F | CGTAGGGACATTGGAAGGAG       | 59.5 | 55   | 19+20   |                      |      |    |       |
|        |   |    |           |   |     |     |     |     | Lu2624R | GAGCGGGATAAGGAAAAAGG       | 60   | 50   | 20      |                      |      |    |       |
| Lu2625 | 1 | p2 | (GA)10    | 3 | 350 | 358 | 366 |     | Lu2625F | AGCAGAGAAACCGATGAACC       | 59.3 | 50   | 19+20   |                      |      |    |       |
|        |   |    |           |   |     |     |     |     | Lu2625R | TCCGGAGAGGGAACCTAACAC      | 59.1 | 55   | 20      |                      |      |    |       |
| Lu2626 | 1 | p2 | (AG)10    | 2 | 245 | 259 |     |     | Lu2626F | CCACCGTCCATGTTCTTTG        | 59.9 | 52.6 | 19+19   |                      |      |    |       |
|        |   |    |           |   |     |     |     |     | Lu2626R | TGACCTTTACGTTGGGAAGG       | 60   | 50   | 20      |                      |      |    |       |
| Lu2628 | 1 | p3 | (ATA)11   | 2 | 307 | 322 |     |     | Lu2628F | TGGTCATGGTGTGGAATCAC       | 60.2 | 50   | 19+20   |                      |      |    |       |
|        |   |    |           |   |     |     |     |     | Lu2628R | TGGACGCTAATAACCTCAAAGC     | 60.6 | 45.5 | 22      |                      |      |    |       |
| Lu2631 | 1 | p5 | (TCATG)5  | 2 | 284 | 289 |     |     | Lu2631F | CGGGACAACATTCATGACC        | 59.8 | 52.6 | 19+19   |                      |      |    |       |
|        |   |    |           |   |     |     |     |     | Lu2631R | TTTCGTTGCTGATTGTGAGC       | 60   | 45   | 20      |                      |      |    |       |
| Lu2633 | 1 | p2 | (AT)18    | 8 | 233 | 237 | 239 | 241 | 243     | 245                        | 247  | 249  | Lu2633F | CATGAATTAGCTCGGGTTCG | 60.6 | 50 | 19+20 |
|        |   |    |           |   |     |     |     |     |         |                            |      |      | Lu2633R | ACCCCATGATGATTGGTGAG | 60.6 | 50 | 20    |
| Lu2635 | 1 | p3 | (TCT)12   | 3 | 326 | 332 | 335 |     | Lu2635F | TCCCTTCTTTAATCTCCTCCTC     | 59.2 | 43.5 | 19+23   |                      |      |    |       |
|        |   |    |           |   |     |     |     |     | Lu2635R | CCAGATGGGAAAATTGAAGC       | 59.5 | 45   | 20      |                      |      |    |       |
| Lu2637 | 1 | p4 | (TTTA)5   | 2 | 338 | 358 |     |     | Lu2637F | CCGACTCTTCTTCCTTCTCG       | 59.2 | 55   | 19+20   |                      |      |    |       |
|        |   |    |           |   |     |     |     |     | Lu2637R | CTGTTTCATTCCACGTTGTTG      | 59.1 | 42.9 | 21      |                      |      |    |       |
| Lu2638 | 1 | p3 | (CAT)6    | 2 | 277 | 292 |     |     | Lu2638F | GACGGTGTGTGCTTGAGG         | 60.3 | 57.9 | 19+19   |                      |      |    |       |
|        |   |    |           |   |     |     |     |     | Lu2638R | CAGGCGCTGGTTATAGATGG       | 60.6 | 55   | 20      |                      |      |    |       |
| Lu2639 | 1 | p3 | (CCT)6    | 2 | 238 | 244 |     |     | Lu2639F | GTGAGCGGAGCCCTAAAG         | 58.5 | 61.1 | 19+18   |                      |      |    |       |
|        |   |    |           |   |     |     |     |     | Lu2639R | AGTCTGCCGTCCACCTTATC       | 59.2 | 55   | 20      |                      |      |    |       |
| Lu2644 | 1 | p6 | (GATGAG)5 | 2 | 336 | 342 |     |     | Lu2644F | AGCTGAGATCCTTCCAGTCG       | 59.6 | 55   | 19+20   |                      |      |    |       |
|        |   |    |           |   |     |     |     |     | Lu2644R | ACACTCAGCGGAGAAAGAGC       | 59.8 | 55   | 20      |                      |      |    |       |
| Lu2645 | 1 | p2 | (AT)13    | 3 | 209 | 217 | 223 |     | Lu2645F | AAGGGTGGGAAATGTGAGG        | 59.8 | 52.6 | 19+19   |                      |      |    |       |
|        |   |    |           |   |     |     |     |     | Lu2645R | CGTCTCGATTCTGTTACTCG       | 59.9 | 52.4 | 21      |                      |      |    |       |
| Lu2648 | 1 | p3 | (CTT)10   | 2 | 344 | 356 |     |     | Lu2648F | CCCTAATCAGACTGGGAAACC      | 59.8 | 52.4 | 19+21   |                      |      |    |       |
|        |   |    |           |   |     |     |     |     | Lu2648R | TGGGTGTTTTAGGAGCTTGC       | 60.2 | 50   | 20      |                      |      |    |       |
| Lu2649 | 1 | p3 | (TCT)8    | 2 | 225 | 228 |     |     | Lu2649F | TCGCTCCTAGGATGAAGCTC       | 59.7 | 55   | 19+20   |                      |      |    |       |
|        |   |    |           |   |     |     |     |     | Lu2649R | GCTCGATTGACACAGTCTCG       | 59.6 | 55   | 20      |                      |      |    |       |
| Lu2651 | 1 | p2 | (AT)10    | 3 | 311 | 313 | 315 |     | Lu2651F | TTAGCCACTTACATTATCAACCTACC | 59   | 38.5 | 19+26   |                      |      |    |       |
|        |   |    |           |   |     |     |     |     | Lu2651R | GAAAATAAGATCTTCCAAATTCATCC | 59.6 | 30.8 | 26      |                      |      |    |       |
| Lu2652 | 1 | p2 | (AT)10    | 4 | 289 | 297 | 299 | 315 | Lu2652F | GAACACATGTAGATGAAAAAGATGG  | 59   | 36   | 19+25   |                      |      |    |       |

|         |   |    |         |   |      |     |     |     |     |         |                         |                      |      |       |       |
|---------|---|----|---------|---|------|-----|-----|-----|-----|---------|-------------------------|----------------------|------|-------|-------|
| Lu2654  | 1 | p2 | (AT)18  | 5 | 239  | 245 | 247 | 249 | 253 | Lu2652R | AAGCAAGCTCAGGATCAAGC    | 59.7                 | 50   | 20    |       |
|         |   |    |         |   |      |     |     |     |     | Lu2654F | CTCAAACAGATTCATGCCAAAA  | 60.1                 | 36.4 | 19+22 |       |
|         |   |    |         |   |      |     |     |     |     | Lu2654R | GAAACACCATCCATCCATCC    | 60                   | 50   | 20    |       |
| Lu2658  | 1 | p2 | (TA)10  | 4 | 342  | 350 | 354 | 356 |     | Lu2658F | GCGAGGCTTCAGATAACAAGG   | 60                   | 55   | 19+20 |       |
|         |   |    |         |   |      |     |     |     |     | Lu2658R | CGTCTCCCATCGTAGAATGC    | 60.6                 | 55   | 20    |       |
| Lu2659  | 1 | p3 | (TCT)7  | 2 | 350  | 353 |     |     |     | Lu2659F | GGCAGTCTTGCTTAAACTTGG   | 59                   | 47.6 | 19+21 |       |
|         |   |    |         |   |      |     |     |     |     | Lu2659R | AAACGTCAAGTCGGAGAAGC    | 59.5                 | 50   | 20    |       |
| Lu2663  | 1 | p3 | (GAT)7  | 2 | 303  | 306 |     |     |     | Lu2663F | TCGTCGTTAGGCTTCTCTCC    | 59.6                 | 55   | 19+20 |       |
|         |   |    |         |   |      |     |     |     |     | Lu2663R | ACTGGATTATGCTTGAAGTCTGG | 59.7                 | 43.5 | 23    |       |
| Lu2664  | 1 | p3 | (AAT)8  | 2 | 364  | 367 |     |     |     | Lu2664F | TGGATCTTCCCACCAGTCTC    | 60                   | 55   | 19+20 |       |
|         |   |    |         |   |      |     |     |     |     | Lu2664R | AGTGGCTGTATTGGGTTTGAG   | 59.1                 | 47.6 | 21    |       |
| Lu2668  | 1 | p3 | (CAA)8  | 3 | 329  | 332 | 338 |     |     | Lu2668F | AGCCGGAGATCATCAACATC    | 60                   | 50   | 19+20 |       |
|         |   |    |         |   |      |     |     |     |     | Lu2668R | TACACGTCGTCGTCACTTC     | 59.8                 | 55   | 20    |       |
| Lu2669  | 1 | p2 | (CT)10  | 2 | 245  | 247 |     |     |     | Lu2669F | TCTCATCCCAAGACCTACGG    | 60.1                 | 55   | 19+20 |       |
|         |   |    |         |   |      |     |     |     |     | Lu2669R | GAATTGAAGCCTACAACCTTGC  | 60.1                 | 45.5 | 22    |       |
| Lu2672  | 1 | p3 | (GGA)6  | 2 | 346  | 349 |     |     |     | Lu2672F | GATCCAAAGGCGAGAGAGG     | 59.9                 | 57.9 | 19+19 |       |
|         |   |    |         |   |      |     |     |     |     | Lu2672R | CATGGGTATCCACCAGTTCC    | 60                   | 55   | 20    |       |
| Lu2673  | 1 | p3 | (GGA)6  | 2 | 354  | 357 |     |     |     | Lu2673F | CGGGAATCTAGGGTTCTGG     | 59.5                 | 57.9 | 19+19 |       |
|         |   |    |         |   |      |     |     |     |     | Lu2673R | TCCTGCATTCAACACGTAGG    | 59.7                 | 50   | 20    |       |
| Lu2676  | 1 | p2 | (TA)13  | 3 | 352  | 354 | 356 |     |     | Lu2676F | TCTTCTCCCTCACTATTCTCC   | 59.8                 | 50   | 19+22 |       |
|         |   |    |         |   |      |     |     |     |     | Lu2676R | GTATATCGGTTTCGGTTTTGTCC | 59.6                 | 45.5 | 22    |       |
| Lu2677  | 1 | p3 | (TAT)11 | 3 | 320  | 323 | 326 |     |     | Lu2677F | AATGCCTCCTCGTCATCATC    | 60                   | 50   | 19+20 |       |
|         |   |    |         |   |      |     |     |     |     | Lu2677R | GTGTCAAACCAGCCTGGAG     | 59.2                 | 57.9 | 19    |       |
| Lu2679a | 2 | p3 | (TTC)8  | 2 | 248  | 251 |     |     |     | Lu2679F | GGTGGTTGGGTTTGAGTTTG    | 60.2                 | 50   | 19+20 |       |
| Lu2679b |   |    |         | 3 | null | 231 | 240 |     |     | Lu2679R | TCCACCACATCTCTCCAATG    | 59.5                 | 50   | 20    |       |
| Lu2681  | 1 | p3 | (CTT)6  | 2 | 197  | 209 |     |     |     | Lu2681F | AGAATCCATACGTGGCAACC    | 59.8                 | 50   | 19+20 |       |
|         |   |    |         |   |      |     |     |     |     | Lu2681R | TGGGAAATTTGGAAGAGAGG    | 59.1                 | 45   | 20    |       |
| Lu2684  | 1 | p3 | (AAG)11 | 3 | 307  | 310 | 319 |     |     | Lu2684F | CGACATCTTCAAATCCTCGAC   | 59.7                 | 47.6 | 19+21 |       |
|         |   |    |         |   |      |     |     |     |     | Lu2684R | CCATTTGCGGATCTGATTG     | 60                   | 47.4 | 19    |       |
| Lu2687  | 1 | p3 | (TTC)7  | 2 | 240  | 243 |     |     |     | Lu2687F | TACAGAGAACAGGGGGTTGG    | 60                   | 55   | 19+20 |       |
|         |   |    |         |   |      |     |     |     |     | Lu2687R | TCCATTAACGCGACTCTGC     | 60                   | 52.6 | 19    |       |
| Lu2689  | 1 | p2 | (AT)19  | 6 | 339  | 351 | 353 | 355 | 359 | 363     | Lu2689F                 | TGATCATCCTTGAACAAACC | 59.8 | 42.9  | 19+21 |
|         |   |    |         |   |      |     |     |     |     | Lu2689R | AACAAAAAGTGGGGTTGCTG    | 60                   | 45   | 20    |       |
| Lu2693  | 1 | p3 | (TAT)6  | 2 | 312  | 339 |     |     |     | Lu2693F | TTATAATATGCCGGTGGTTGG   | 59.6                 | 42.9 | 19+21 |       |
|         |   |    |         |   |      |     |     |     |     | Lu2693R | GTGTTCAAAGAGACCGTCACC   | 59.6                 | 52.4 | 21    |       |
| Lu2694  | 1 | p2 | (TC)12  | 3 | 364  | 366 | 368 |     |     | Lu2694F | ACCAAACATGGGCACTTCTC    | 60                   | 50   | 19+20 |       |
|         |   |    |         |   |      |     |     |     |     | Lu2694R | TGCATGTGTGCAATTGTGAG    | 60.3                 | 45   | 20    |       |
| Lu2695  | 1 | p2 | (TA)9   | 3 | 303  | 337 | 339 |     |     | Lu2695F | ATCACGTGGACACTTTGGAAC   | 59.9                 | 47.6 | 19+21 |       |
|         |   |    |         |   |      |     |     |     |     | Lu2695R | CGCTTTTTATCACGAGAATCG   | 59.9                 | 42.9 | 21    |       |
| Lu2696  | 1 | p2 | (AG)13  | 3 | 318  | 322 | 330 |     |     | Lu2696F | TGGAGCCTATGGATTGAAGTG   | 60.1                 | 47.6 | 19+21 |       |
|         |   |    |         |   |      |     |     |     |     | Lu2696R | AACCGCCCCTCACCAC        | 60.5                 | 68.8 | 16    |       |
| Lu2697a | 2 | p2 | (AT)10  | 2 | 308  | 310 |     |     |     | Lu2697F | AAACGTGTAACCGGAAATGG    | 59.7                 | 45   | 19+20 |       |



|         |   |    |         |   |                         |         |                          |      |      |       |
|---------|---|----|---------|---|-------------------------|---------|--------------------------|------|------|-------|
| Lu2697b |   |    |         | 3 | 330 334 338             | Lu2697R | CCAAGAAAATGGTGGAAAGC     | 59.5 | 45   | 20    |
| Lu2698  | 1 | p3 | (TAA)6  | 2 | 343 346                 | Lu2698F | TAAGGCAGGTCCCACATAGG     | 59.9 | 55   | 19+20 |
|         |   |    |         |   |                         | Lu2698R | AAACAAAGCCGAAATCAACG     | 60.1 | 40   | 20    |
| Lu2700  | 1 | p2 | (AT)19  | 5 | 336 338 342 360 362     | Lu2700F | TTGGGACTCACCTATGTTAAACG  | 60.3 | 43.5 | 19+23 |
|         |   |    |         |   |                         | Lu2700R | AACCAAACATCTGGCAAAGG     | 60   | 45   | 20    |
| Lu2704  | 1 | p2 | (GA)9   | 3 | 280 286 288             | Lu2704F | TCCCTGGCATGAAAGAAAAG     | 60.2 | 45   | 19+20 |
|         |   |    |         |   |                         | Lu2704R | AAAGAGCAACCCCAACCTTC     | 60.5 | 50   | 20    |
| Lu2706  | 1 | p4 | (GGTT)6 | 2 | 234 238                 | Lu2706F | AGAAGTCGCCATTGTTACGG     | 60.1 | 50   | 19+20 |
|         |   |    |         |   |                         | Lu2706R | TCCAACCTTAACCGAAAACG     | 60   | 45   | 20    |
| Lu2707  | 1 | p2 | (AC)9   | 2 | 325 327                 | Lu2707F | TAACAAAGCCAGCACACGAC     | 59.9 | 50   | 19+20 |
|         |   |    |         |   |                         | Lu2707R | AATGTTAGGGGATCCGGAAG     | 60.1 | 50   | 20    |
| Lu2712  | 1 | p3 | (AAT)6  | 4 | 326 344 347 350         | Lu2712F | AGAGTGAACGAGCCAACAGG     | 60.4 | 55   | 19+20 |
|         |   |    |         |   |                         | Lu2712R | TCCTCAAGGCAAAGAATCG      | 60.3 | 45   | 20    |
| Lu2714  | 1 | p4 | (AGCT)5 | 2 | 201 205                 | Lu2714F | AATGAAGCAAAGGCAAAAAGC    | 59.5 | 40   | 19+20 |
|         |   |    |         |   |                         | Lu2714R | CTCACCCATCCATATCTTACCC   | 59.6 | 50   | 22    |
| Lu2718  | 1 | p3 | (ACT)8  | 2 | 355 364                 | Lu2718F | TTGCATGTTTTTGGAGAACG     | 59.7 | 40   | 19+20 |
|         |   |    |         |   |                         | Lu2718R | ACAGGCCCTAGAGTTTAATTTCC  | 59.1 | 43.5 | 23    |
| Lu2719  | 1 | p3 | (CGC)6  | 2 | 255 261                 | Lu2719F | TGAGGTGAAAACAATCCCATC    | 59.8 | 42.9 | 19+21 |
|         |   |    |         |   |                         | Lu2719R | GGTTTCCAGGTTCTTCTCTGC    | 60.2 | 52.4 | 21    |
| Lu2720  | 1 | p3 | (CTT)8  | 2 | 313 316                 | Lu2720F | GAAAGGCTGAAAGGCTGAAAC    | 60.4 | 47.6 | 19+21 |
|         |   |    |         |   |                         | Lu2720R | TGAGGCGAAATTGGATTACC     | 59.9 | 45   | 20    |
| Lu2724  | 1 | p3 | (GAA)6  | 2 | 302 308                 | Lu2724F | TTCTTGCTGATGTGCTCTGC     | 60.3 | 50   | 19+20 |
|         |   |    |         |   |                         | Lu2724R | CCGCCGTAAATAACACATCC     | 60.2 | 50   | 20    |
| Lu2725  | 1 | p2 | (AT)15  | 6 | 341 343 347 357 359 361 | Lu2725F | ACCGGCTCACAGAAGTCAAC     | 60.3 | 55   | 19+20 |
|         |   |    |         |   |                         | Lu2725R | AAAAATTGCCACGTTGAACC     | 59.8 | 40   | 20    |
| Lu2727  | 1 | p3 | (TAC)7  | 3 | 359 362 365             | Lu2727F | GGGGTTGGGTGTACATTGAC     | 60   | 55   | 19+20 |
|         |   |    |         |   |                         | Lu2727R | AGCCATAGGTCCCCATTACC     | 60   | 55   | 20    |
| Lu2728  | 1 | p3 | (TCT)8  | 2 | 336 342                 | Lu2728F | CGAACGAGTCGACAAAACAC     | 59.3 | 50   | 19+20 |
|         |   |    |         |   |                         | Lu2728R | CCTGCTCCTGGAGTGAAGAC     | 60   | 60   | 20    |
| Lu2729  | 1 | p3 | (AAT)13 | 2 | 264 270                 | Lu2729F | CCCCCTCTTCATTTTGCTTAG    | 60.1 | 47.6 | 19+21 |
|         |   |    |         |   |                         | Lu2729R | TGAGCAGAGCTCCTATTCGTG    | 59.7 | 52.4 | 21    |
| Lu2730  | 1 | p2 | (AG)11  | 3 | 257 271 275             | Lu2730F | TCATGGTATGGGTTTCAGACG    | 59.4 | 50   | 19+20 |
|         |   |    |         |   |                         | Lu2730R | GATTGGTGGTGTGGTCAGTG     | 59.8 | 55   | 20    |
| Lu2731  | 1 | p2 | (AG)11  | 5 | 367 369 377 379 381     | Lu2731F | AGTTACAGGGGCGGAACAC      | 60   | 57.9 | 19+19 |
|         |   |    |         |   |                         | Lu2731R | TGAGAACAACCCGAAAGAC      | 60.1 | 50   | 20    |
| Lu2732  | 1 | p2 | (AT)20  | 5 | 341 343 347 349 351     | Lu2732F | TTTCTCAATTATTAACACACACAC | 57.4 | 30.8 | 19+26 |
|         |   |    |         |   |                         | Lu2732R | TTTGCTAGGTTGGCAAAAAC     | 58   | 40   | 20    |
| Lu2739  | 1 | p2 | (AT)15  | 5 | 290 292 294 296 298     | Lu2739F | AAATTGCATAGATGGGATGACC   | 60   | 40.9 | 19+22 |
|         |   |    |         |   |                         | Lu2739R | TGTCCTAGCGTGGAAAAGG      | 60.2 | 50   | 20    |
| Lu2740  | 1 | p3 | (TGC)7  | 2 | 222 225                 | Lu2740F | CAGTGTGCATGGCTTTTCC      | 60.3 | 52.6 | 19+19 |
|         |   |    |         |   |                         | Lu2740R | GGCGGAATTCCTTTTCACTAC    | 60   | 47.6 | 21    |
| Lu2741  | 1 | p3 | (CTT)7  | 2 | 188 191                 | Lu2741F | AGCAGCAGGAAATTGACCAC     | 60.3 | 50   | 19+20 |

|         |   |    |                                                                                                                 |   |      |                     |         |                          |      |      |       |
|---------|---|----|-----------------------------------------------------------------------------------------------------------------|---|------|---------------------|---------|--------------------------|------|------|-------|
| Lu2745  | 1 | p3 | (GCG)6                                                                                                          | 2 | 282  | 288                 | Lu2741R | CTTTCCCCACCAACTTTTC      | 60.7 | 50   | 20    |
|         |   |    |                                                                                                                 |   |      |                     | Lu2745F | AGCGTAGGAAGCCATGAGG      | 60.4 | 57.9 | 19+19 |
| Lu2746  | 1 | p2 | (TA)9                                                                                                           | 2 | 406  | 408                 | Lu2745R | CCCCTTCACAACCTCCATCC     | 60.3 | 57.9 | 19    |
|         |   |    |                                                                                                                 |   |      |                     | Lu2746F | AGGTCACGACCACTCATCATC    | 60   | 52.4 | 19+21 |
| Lu2751  | 1 | p3 | (GAA)11                                                                                                         | 4 | 282  | 291 294 297         | Lu2746R | CGTGCGAAACAAAATGAAAC     | 59.2 | 40   | 20    |
|         |   |    |                                                                                                                 |   |      |                     | Lu2751F | AGGGGAAAGCTGAGTTGAGAG    | 60   | 52.4 | 19+21 |
| Lu2752  | 1 | p2 | (CT)10                                                                                                          | 2 | 212  | 214                 | Lu2751R | GACATGGACATCCCAAGGAC     | 60.2 | 55   | 20    |
|         |   |    |                                                                                                                 |   |      |                     | Lu2752F | ATTCGTGATCGGCAATAACC     | 59.8 | 45   | 19+20 |
| Lu2756  | 1 | p3 | (GAA)7                                                                                                          | 2 | null | 301                 | Lu2752R | GGAGCTGGGAAATGATCAAG     | 59.6 | 50   | 20    |
|         |   |    |                                                                                                                 |   |      |                     | Lu2756F | CGTCGTCAATTGTCAATCTGC    | 60.3 | 50   | 19+20 |
| Lu2757  | 1 | p4 | (CTTT)5                                                                                                         | 2 | 303  | 307                 | Lu2756R | TCAAGCACGACATTCTTTTCG    | 60   | 45   | 20    |
|         |   |    |                                                                                                                 |   |      |                     | Lu2757F | AAACACATACTGCCGCAGAG     | 59   | 50   | 19+20 |
| Lu2758  | 1 | p3 | (GAT)8                                                                                                          | 3 | 225  | 228 231             | Lu2757R | CCGTTAGGCTAGGAACATGC     | 59.7 | 55   | 20    |
|         |   |    |                                                                                                                 |   |      |                     | Lu2758F | GTGGCTCAAACAACCTCTACCC   | 60   | 50   | 19+22 |
| Lu2764  | 1 | p2 | (AT)13                                                                                                          | 3 | 203  | 205 209             | Lu2758R | TTTCTCTTCTCCTGCTTGCTCG   | 59.7 | 47.6 | 21    |
|         |   |    |                                                                                                                 |   |      |                     | Lu2764F | CATTACGTTGGTGGATTCTCG    | 60.4 | 47.6 | 19+21 |
| Lu2767  | 1 | p4 | (GAAA)9                                                                                                         | 2 | 242  | 254                 | Lu2764R | CCCAGCTAGCATGAATACCC     | 59.6 | 55   | 20    |
|         |   |    |                                                                                                                 |   |      |                     | Lu2767F | CAGCTGGGGGTGAATGAAT      | 60.9 | 52.6 | 19+19 |
| Lu2770  | 1 | p3 | (ATC)8                                                                                                          | 2 | 282  | 288                 | Lu2767R | AGTTGCTAGGCGATGGAGAA     | 60   | 50   | 20    |
|         |   |    |                                                                                                                 |   |      |                     | Lu2770F | CGACGACAATGAACAAATGC     | 60.1 | 45   | 19+20 |
| Lu2771  | 1 | p3 | (GAA)8                                                                                                          | 3 | 347  | 350 353             | Lu2770R | GTAGCCGTTGGTTCTTGG       | 60.5 | 57.9 | 19    |
|         |   |    |                                                                                                                 |   |      |                     | Lu2771F | AGATGAAGGGGGAAATGAGG     | 60.3 | 50   | 19+20 |
| Lu2773  | 1 | p2 | (TA)10                                                                                                          | 4 | 347  | 351 359 363         | Lu2771R | GACCAACCAAACCAAAATCG     | 60.2 | 45   | 20    |
|         |   |    |                                                                                                                 |   |      |                     | Lu2773F | GATACGTGGCAAAGCAAAGAG    | 59.9 | 47.6 | 19+21 |
| Lu2774  | 1 | p3 | (AGA)8                                                                                                          | 2 | 357  | 360                 | Lu2773R | CCATGCACGCACTATGTTG      | 59.7 | 52.6 | 19    |
|         |   |    |                                                                                                                 |   |      |                     | Lu2774F | AGGCTGAGGTTTCAAGTTGC     | 59.5 | 50   | 19+20 |
| Lu2775a | 2 | p3 | (TCT)6                                                                                                          | 2 | 273  | 276                 | Lu2774R | TGGGTTCCACCTTTTCTTTTCG   | 60.1 | 45   | 20    |
| Lu2775b |   |    |                                                                                                                 | 2 | 164  | 167                 | Lu2775F | TCCTCTCAGCTGGCTTCTTC     | 59.8 | 55   | 19+20 |
| Lu2776  | 1 | p3 | (AGT)7                                                                                                          | 3 | 296  | 302 305             | Lu2775R | GAACAGTGGCATTCCCGTAG     | 60.5 | 55   | 20    |
|         |   |    |                                                                                                                 |   |      |                     | Lu2776F | CACCAAAAACCTGGGCTTACC    | 59.5 | 50   | 19+20 |
|         |   |    | (AG)19aaaactcacttgatctgtgaagaatcca<br>acaggggaaacagagcaataattgatctgaaca<br>cagaaaaggaaaaggagaagatggag(AA<br>C)7 | 3 | 401  | 403 405             | Lu2776R | TGCAACTGCAAGATAGAAAAGG   | 59.5 | 40.9 | 22    |
| Lu2777a | 2 | c  |                                                                                                                 | 3 | 349  | 351 353             | Lu2777F | CAAGCGGATTTACAGAAGG      | 59.7 | 50   | 19+20 |
| Lu2777b |   |    |                                                                                                                 | 3 | 298  | 300 302 304 316 321 | Lu2777R | GTGGTTAGGGATATTTGTGATTCC | 59.9 | 41.7 | 24    |
| Lu2778  | 1 | p2 | (AT)21                                                                                                          | 6 | 263  | 266 269 275         | Lu2778F | TCCCCAATGCTCTGGTTATC     | 59.9 | 50   | 19+20 |
|         |   |    |                                                                                                                 |   |      |                     | Lu2778R | AGATGTCAATGAGGCATCACC    | 59.9 | 47.6 | 21    |
| Lu2779  | 1 | p3 | (ATA)13                                                                                                         | 4 | 187  | 193                 | Lu2779F | CAGAGGCCAGTTCATTCCAT     | 60.1 | 50   | 19+20 |
|         |   |    |                                                                                                                 |   |      |                     | Lu2779R | TACTCTCCTGCCGCCTCTAA     | 60.1 | 55   | 20    |
| Lu2780  | 1 | p5 | (CGTAG)6                                                                                                        | 2 |      |                     | Lu2780F | AATGGTTCTTCGTCGGTTTG     | 60   | 45   | 19+20 |
|         |   |    |                                                                                                                 |   |      |                     | Lu2780R | AAGGAAATTGCTGCATACGG     | 60.1 | 45   | 20    |

|         |   |    |          |   |      |     |     |         |                           |         |                          |                       |      |       |       |
|---------|---|----|----------|---|------|-----|-----|---------|---------------------------|---------|--------------------------|-----------------------|------|-------|-------|
| Lu2782  | 1 | p3 | (CTT)16  | 3 | 257  | 281 | 284 | Lu2782F | CTCCCTCGTTTTCTTCGTTG      | 59.8    | 50                       | 19+20                 |      |       |       |
|         |   |    |          |   |      |     |     | Lu2782R | CAGGAGAAGTGGGAATTTGC      | 59.7    | 50                       | 20                    |      |       |       |
| Lu2783  | 1 | p2 | (GA)9    | 2 | 359  | 361 |     | Lu2783F | CGCTTCCTCTCTCTCCAC        | 59.3    | 60                       | 19+20                 |      |       |       |
|         |   |    |          |   |      |     |     | Lu2783R | CCACCCACCCTACATACGAC      | 60.1    | 60                       | 20                    |      |       |       |
| Lu2784  | 1 | p5 | (GAACA)5 | 2 | 323  | 333 |     | Lu2784F | TTGTAGAGTCGTTAGCAGATTGATG | 59.9    | 40                       | 19+25                 |      |       |       |
|         |   |    |          |   |      |     |     | Lu2784R | GAGTGGATGTGGGTTGCAC       | 60      | 57.9                     | 19                    |      |       |       |
| Lu2787  | 1 | p3 | (TTA)18  | 3 | 292  | 295 | 298 | Lu2787F | GTTGGGTGGAACAATTTGG       | 60.1    | 45                       | 19+20                 |      |       |       |
|         |   |    |          |   |      |     |     | Lu2787R | GCAGCAGTAAGCAGCAAGC       | 60.1    | 57.9                     | 19                    |      |       |       |
| Lu2793a | 2 | p2 | (TA)9    | 2 | null | 353 |     | Lu2793F | CGACAGCATTGAAAGACAGC      | 59.6    | 50                       | 19+20                 |      |       |       |
| Lu2793b |   |    |          | 2 | 310  | 345 |     | Lu2793R | TTTCTGTGCTTTCCCTACCC      | 59.2    | 50                       | 20                    |      |       |       |
| Lu2794  | 1 | p3 | (AAG)7   | 3 | 212  | 215 | 218 | Lu2794F | TTGGTGTGTTGCTGTTTCC       | 59.6    | 45                       | 19+20                 |      |       |       |
|         |   |    |          |   |      |     |     | Lu2794R | GCAGATCCAATCCAACACG       | 60.1    | 52.6                     | 19                    |      |       |       |
| Lu2795  | 1 | p2 | (AT)15   | 5 | 341  | 343 | 347 | 351     | 353                       | Lu2795F | TCCCTTTCTCTCCGTGGAC      | 60.2                  | 57.9 | 19+19 |       |
|         |   |    |          |   |      |     |     | Lu2795R | CATGGATAGGGACCAACGAC      | 60.2    | 55                       | 20                    |      |       |       |
| Lu2796  | 1 | p3 | (ATA)15  | 5 | 187  | 190 | 199 | 202     | 208                       | Lu2796F | GGCAACAAGAAGGCAAGAAC     | 59.9                  | 50   | 19+20 |       |
|         |   |    |          |   |      |     |     | Lu2796R | GGGTGGCCAACACATCTTAC      | 60.2    | 55                       | 20                    |      |       |       |
| Lu2799  | 1 | p4 | (GTAC)5  | 2 | 194  | 198 |     |         |                           | Lu2799F | CACTTTCGATCATCTTCTTTGG   | 60.2                  | 43.5 | 19+23 |       |
|         |   |    |          |   |      |     |     | Lu2799R | GACGTCAACTGGTTGTGTCG      | 60.2    | 55                       | 20                    |      |       |       |
| Lu2800  | 1 | p3 | (TCG)6   | 3 | 212  | 215 | 218 | Lu2800F | AGCAGCAATCATCGGTAAGG      | 60.2    | 50                       | 19+20                 |      |       |       |
|         |   |    |          |   |      |     |     | Lu2800R | GCTCACGGGCATCTAATCC       | 60.6    | 57.9                     | 19                    |      |       |       |
| Lu2801  | 1 | p3 | (GAA)10  | 2 | 252  | 255 |     |         |                           | Lu2801F | CGTAATCATCATCTCTCAGTAGGG | 59.2                  | 45.8 | 19+24 |       |
|         |   |    |          |   |      |     |     | Lu2801R | CCTCTTGGATTCATCTTTCTCC    | 59.2    | 45.5                     | 22                    |      |       |       |
| Lu2802  | 1 | p3 | (AAG)7   | 2 | 316  | 319 |     |         |                           | Lu2802F | CCCATGCCACATAATGTATCC    | 59.9                  | 47.6 | 19+21 |       |
|         |   |    |          |   |      |     |     | Lu2802R | TGCATCTGGAAGTGAACAGC      | 60      | 50                       | 20                    |      |       |       |
| Lu2803  | 1 | p2 | (AT)13   | 4 | 344  | 346 | 352 | 356     |                           | Lu2803F | TGCAGCTCGTTTTTCTTCG      | 60.3                  | 47.4 | 19+19 |       |
|         |   |    |          |   |      |     |     | Lu2803R | ACGGTTCGTTTTTACTTCAAGC    | 59.7    | 40.9                     | 22                    |      |       |       |
| Lu2807  | 1 | p3 | (TAT)10  | 3 | 221  | 224 | 227 |         |                           | Lu2807F | TGATTCAGTGGCTTGTACC      | 59.7                  | 50   | 19+20 |       |
|         |   |    |          |   |      |     |     | Lu2807R | AATTAATGGGGCTGGCTAGG      | 60.3    | 50                       | 20                    |      |       |       |
| Lu2808  | 1 | p3 | (TTG)6   | 2 | 266  | 269 |     |         |                           | Lu2808F | ATCTCAAGGTTTCGGATGCAG    | 60.2                  | 50   | 19+20 |       |
|         |   |    |          |   |      |     |     | Lu2808R | AAGCACTTGCTTCTCCCTCTC     | 60.1    | 52.4                     | 21                    |      |       |       |
| Lu2809a | 2 | p2 | (AG)10   | 2 | 347  | 349 |     |         |                           | Lu2809F | GGTCAAGGCTGAGAAATTGG     | 59.7                  | 50   | 19+20 |       |
| Lu2809b |   |    |          | 5 | 374  | 372 | 370 | 352     | 350                       | Lu2809R | ACGCATCCTTAGTGGACCTG     | 60.1                  | 55   | 20    |       |
| Lu2810  | 1 | p2 | (AT)15   | 6 | 259  | 256 | 254 | 242     | 240                       | 238     | Lu2810F                  | ACGATGAAACCACAAGACCAG | 60   | 47.6  | 19+21 |
|         |   |    |          |   |      |     |     | Lu2810R | GACGTGTAAAACGGGTTTGG      | 60.3    | 50                       | 20                    |      |       |       |
| Lu2812  | 1 | p3 | (CAG)13  | 3 | 322  | 303 | 297 |         |                           | Lu2812F | GGGATTATTGGGTTGTGG       | 59.9                  | 52.6 | 19+19 |       |
|         |   |    |          |   |      |     |     | Lu2812R | AAGGCTCTTTGCTTCCTTCC      | 60      | 50                       | 20                    |      |       |       |
| Lu2813  | 1 | p3 | (AAT)8   | 2 | 213  | 207 |     |         |                           | Lu2813F | GAGACCCCTAGTCGAACTGC     | 58.9                  | 60   | 19+20 |       |
|         |   |    |          |   |      |     |     | Lu2813R | TTTGCTTCCGTTATCTCTTGC     | 59.5    | 42.9                     | 21                    |      |       |       |
| Lu2814  | 1 | p3 | (GGA)6   | 2 | 208  | 202 |     |         |                           | Lu2814F | TCTGCACCGTCATAATCACC     | 59.5                  | 50   | 19+20 |       |
|         |   |    |          |   |      |     |     | Lu2814R | GGGAGAGGGAGAAGAAGAGC      | 59.5    | 60                       | 20                    |      |       |       |
| Lu2815  | 1 | p3 | (TCA)7   | 2 | null | 296 |     |         |                           | Lu2815F | ACGTGACTCCTGGAGATTGC     | 60.3                  | 55   | 19+20 |       |
|         |   |    |          |   |      |     |     | Lu2815R | TACCCGCGTTTTTCACTTC       | 60.1    | 45                       | 20                    |      |       |       |

|         |   |    |                                                                                   |   |      |     |     |     |     |         |                         |                           |                       |       |       |       |
|---------|---|----|-----------------------------------------------------------------------------------|---|------|-----|-----|-----|-----|---------|-------------------------|---------------------------|-----------------------|-------|-------|-------|
| Lu2819  | 1 | p2 | (TA)10                                                                            | 2 | 321  | 323 |     |     |     | Lu2819F | GCCTCTAAAGCTAATTGCATAGG | 58.7                      | 43.5                  | 19+23 |       |       |
|         |   |    |                                                                                   |   |      |     |     |     |     | Lu2819R | AGGGACAATGAACAGTCCTACAC | 59.4                      | 47.8                  | 23    |       |       |
| Lu2820  | 1 | p3 | (TCT)6                                                                            | 2 | 351  | 354 |     |     |     | Lu2820F | AGTCGTTTTCTAATCGGCCTAA  | 59.3                      | 40.9                  | 19+22 |       |       |
|         |   |    |                                                                                   |   |      |     |     |     |     | Lu2820R | ATCGAACGGAGAATGTACGG    | 60                        | 50                    | 20    |       |       |
| Lu2822  | 1 | p3 | (TAT)11                                                                           | 2 | 295  | 298 |     |     |     | Lu2822F | AATGAGGCCACTCCATAACG    | 60                        | 50                    | 19+20 |       |       |
|         |   |    |                                                                                   |   |      |     |     |     |     | Lu2822R | TTTGGATGTGAGCTTCCTGTT   | 59.7                      | 42.9                  | 21    |       |       |
| Lu2823  | 1 | p3 | (TTG)6                                                                            | 2 | 287  | 293 |     |     |     | Lu2823F | AAATTGGTGGAAATCCGAATG   | 59.6                      | 40                    | 19+20 |       |       |
|         |   |    |                                                                                   |   |      |     |     |     |     | Lu2823R | AAAAGAACGCGACGATTAGC    | 59.5                      | 45                    | 20    |       |       |
| Lu2824  | 1 | p3 | (AAG)6                                                                            | 2 | 204  | 207 |     |     |     | Lu2824F | CTCCCAAGGTGAAGAAATCG    | 59.7                      | 50                    | 19+20 |       |       |
|         |   |    |                                                                                   |   |      |     |     |     |     | Lu2824R | AGAGCTGAAGCAATCTGAACG   | 59.8                      | 47.6                  | 21    |       |       |
| Lu2825a | 2 | p2 | (AT)16                                                                            | 2 | 311  | 313 |     |     |     | Lu2825F | CTTTGCTTGCATTTGAGAACC   | 59.9                      | 42.9                  | 19+21 |       |       |
| Lu2825b |   |    |                                                                                   | 6 | 395  | 397 | 409 | 411 | 413 | 415     | Lu2825R                 | CTGAGAACGCAAGCTATCAGG     | 60.2                  | 52.4  | 21    |       |
| Lu2827  | 1 | p3 | (GAA)6                                                                            | 2 | 336  | 348 |     |     |     |         | Lu2827F                 | TGCCCCATATCTCAGAGGTC      | 60                    | 55    | 19+20 |       |
|         |   |    |                                                                                   |   |      |     |     |     |     | Lu2827R | AGAATGCCACCATTGCTCTC    | 60.2                      | 50                    | 20    |       |       |
| Lu2828  | 1 | c  | (GAA)7ggaaataattaagtacgaaggatgac<br>ggtcaga(GCT)7                                 | 2 | 204  | 207 |     |     |     |         | Lu2828F                 | TTGCATGGCTGTTGAATAGG      | 59.7                  | 45    | 19+20 |       |
|         |   |    |                                                                                   |   |      |     |     |     |     | Lu2828R | TTGGGCCACAACAGATCC      | 60.5                      | 55.6                  | 18    |       |       |
| Lu2829a | 2 | p4 | (GAAG)5                                                                           | 2 | 322  | 326 |     |     |     |         | Lu2829F                 | GAAAAAGCGGTGACAAGGAG      | 59.9                  | 50    | 19+20 |       |
| Lu2829b |   |    |                                                                                   | 2 | 305  | 309 |     |     |     |         | Lu2829R                 | TGGTGCAGGTCTCACTTCTG      | 60                    | 55    | 20    |       |
| Lu2832  | 1 | p2 | (TA)25                                                                            | 7 | 421  | 427 | 437 | 457 | 459 | 477     | 479                     | Lu2832F                   | GAACCCGATTTAACAGTGTGG | 59.3  | 47.6  | 19+21 |
|         |   |    |                                                                                   |   |      |     |     |     |     |         | Lu2832R                 | CGATTTGAGATTTTGAATCAACC   | 59.8                  | 34.8  | 23    |       |
| Lu2833  | 1 | p3 | (TAA)6                                                                            | 2 | 275  | 284 |     |     |     |         | Lu2833F                 | GAGAAATGGAGGAGACGAACC     | 60.1                  | 52.4  | 19+21 |       |
|         |   |    |                                                                                   |   |      |     |     |     |     |         | Lu2833R                 | TCGAGTCGAGGTGAACCTATG     | 60.3                  | 52.4  | 21    |       |
| Lu2835  | 1 | p3 | (TCT)6                                                                            | 2 | 222  | 225 |     |     |     |         | Lu2835F                 | ACGAGGAATTGGAGAATGACC     | 60.3                  | 47.6  | 19+21 |       |
|         |   |    |                                                                                   |   |      |     |     |     |     |         | Lu2835R                 | TGAGGAGGATTTGAAGTGACG     | 60.2                  | 47.6  | 21    |       |
| Lu2836  | 1 | p3 | (TTC)6                                                                            | 2 | 192  | 195 |     |     |     |         | Lu2836F                 | ATCTTGCAAGGAACCTGACG      | 60.3                  | 50    | 19+20 |       |
|         |   |    |                                                                                   |   |      |     |     |     |     |         | Lu2836R                 | TCTCCTTCTCCGTTGATTCTG     | 60.3                  | 50    | 20    |       |
| Lu2837a | 2 | p2 | (AG)12                                                                            | 2 | null | 355 |     |     |     |         | Lu2837F                 | TGATGTGACTCTGCCTCTGG      | 60                    | 55    | 19+20 |       |
| Lu2837b |   |    |                                                                                   | 2 | null | 353 |     |     |     |         | Lu2837R                 | GTCTGTAGGTGCTGCTGACG      | 59.6                  | 60    | 20    |       |
| Lu2838  | 1 | p3 | (CCG)6                                                                            | 2 | null | 254 |     |     |     |         | Lu2838F                 | CTGTCCGACGCCCTAATATC      | 59.6                  | 55    | 19+20 |       |
|         |   |    |                                                                                   |   |      |     |     |     |     |         | Lu2838R                 | CATGCCGACCTAGTGTTTACC     | 59.5                  | 52.4  | 21    |       |
| Lu2839  | 1 | c  | (ATA)11ctaataataaagacataaagaaatta<br>taacataaattcattaattatcaactgctaccgt(A<br>TA)6 | 2 | 353  | 358 |     |     |     |         | Lu2839F                 | TTCATTAATTTATCAACTGCTACCG | 58.7                  | 32    | 19+25 |       |
|         |   |    |                                                                                   |   |      |     |     |     |     |         | Lu2839R                 | TGCCACCATCATTTTATCAAG     | 58.5                  | 38.1  | 21    |       |
| Lu2840  | 1 | p3 | (ATG)6                                                                            | 2 | 300  | 324 |     |     |     |         | Lu2840F                 | TGCAGGCAGTTATGATCAGC      | 60                    | 50    | 19+20 |       |
|         |   |    |                                                                                   |   |      |     |     |     |     |         | Lu2840R                 | TCATCCTGCTCCACTGTGTC      | 59.8                  | 55    | 20    |       |
| Lu2843  | 1 | p2 | (TC)11                                                                            | 2 | null | 346 |     |     |     |         | Lu2843F                 | ACCTGGTTTTCTTGTCTGTTCC    | 59.5                  | 45.5  | 19+22 |       |
|         |   |    |                                                                                   |   |      |     |     |     |     |         | Lu2843R                 | TCCAAACATCCACAATCGTC      | 59.3                  | 45    | 20    |       |
| Lu2847  | 1 | p3 | (TGA)6                                                                            | 2 | 355  | 358 |     |     |     |         | Lu2847F                 | GCACAAAGAGGGAAAATTGG      | 59.5                  | 45    | 19+20 |       |
|         |   |    |                                                                                   |   |      |     |     |     |     |         | Lu2847R                 | GTTCCGGACAAGGGACAAGAG     | 59.7                  | 55    | 20    |       |
| Lu2848  | 1 | p3 | (TTC)6                                                                            | 2 | 256  | 257 |     |     |     |         | Lu2848F                 | GACCAGCTTCTCTGTTTCG       | 60                    | 55    | 19+20 |       |

|         |   |    |                                                                                                                                          |   |     |     |                             |         |                            |      |      |       |
|---------|---|----|------------------------------------------------------------------------------------------------------------------------------------------|---|-----|-----|-----------------------------|---------|----------------------------|------|------|-------|
| Lu2850  | 1 | p6 | (TTGGGA)7                                                                                                                                | 3 | 258 | 270 | 276                         | Lu2848R | CATCATCTCCGAGAACTTGC       | 59.8 | 47.6 | 21    |
|         |   |    |                                                                                                                                          |   |     |     |                             | Lu2850F | TAGCTCAGCTCCGAAAATGG       | 60.5 | 50   | 19+20 |
|         |   |    |                                                                                                                                          |   |     |     |                             | Lu2850R | GGCTAATTGAGGGACCAAATC      | 59.8 | 47.6 | 21    |
| Lu2851a | 2 | p4 | (ACAA)5                                                                                                                                  | 2 | 491 | 521 |                             | Lu2851F | GCCTACAATAAGAAGCCAAATCC    | 60.3 | 43.5 | 19+23 |
| Lu2851b |   |    |                                                                                                                                          | 2 | 301 | 326 |                             | Lu2851R | GGCTTTTCCCACATGATCC        | 60.3 | 52.6 | 19    |
| Lu2853  | 1 | p2 | (AT)14                                                                                                                                   | 5 | 283 | 291 | 293 297 305                 | Lu2853F | TCATTCCACTGTTCTCCAAGC      | 60.2 | 47.6 | 19+21 |
|         |   |    |                                                                                                                                          |   |     |     |                             | Lu2853R | GAAAATTTGCATGCCTGGTC       | 60.5 | 45   | 20    |
| Lu2855  | 1 | p4 | (CAGT)5                                                                                                                                  | 2 | 360 | 364 |                             | Lu2855F | ATGAAGGTCCCGTCACTGAG       | 60.1 | 55   | 19+20 |
|         |   |    |                                                                                                                                          |   |     |     |                             | Lu2855R | AATGAGTGCTCTGGAAACGTG      | 60.3 | 47.6 | 21    |
| Lu2857  | 1 | p2 | (GA)11                                                                                                                                   | 2 | 252 | 254 |                             | Lu2857F | TCCTCATCCTCATCCTCCTG       | 60.2 | 55   | 19+20 |
|         |   |    |                                                                                                                                          |   |     |     |                             | Lu2857R | GCTTGCTGGAGGAATTTGAC       | 59.8 | 50   | 20    |
| Lu2858  | 1 | p3 | (GAG)6                                                                                                                                   | 2 | 186 | 195 |                             | Lu2858F | CAGGGATGTCTGCTAGAGAGG      | 59.1 | 57.1 | 19+21 |
|         |   |    |                                                                                                                                          |   |     |     |                             | Lu2858R | ATCCCACCATCACCATCTTC       | 59.6 | 50   | 20    |
| Lu2859  | 1 | p3 | (GAT)9                                                                                                                                   | 2 | 267 | 273 |                             | Lu2859F | GGGGGAAGAAGAAGAAGACG       | 60.2 | 55   | 19+20 |
|         |   |    |                                                                                                                                          |   |     |     |                             | Lu2859R | TTTGGTCTTGTATCAGCAGTAAGC   | 59.9 | 41.7 | 24    |
|         |   |    | (TCCAG)5tccccaccattccctccctcccaa<br>accctctctagagcaatcaatt(GCA)7gagag<br>atatcatcaaagagaaagacaaagaaaagcgt<br>cagagaaagaagccctatctt(CAG)7 | 3 | 313 | 328 | 333                         | Lu2861F | ACCCCTCTCTTCCTTTTTTGC      | 59.7 | 50   | 19+20 |
| Lu2861  | 1 | c  |                                                                                                                                          |   |     |     |                             | Lu2861R | GAGGGGGAGTAACAGTTGAGG      | 60   | 57.1 | 21    |
| Lu2862  | 1 | p3 | (AAT)7                                                                                                                                   | 2 | 201 | 207 |                             | Lu2862F | ATTA AATTGAGGCACCACCAC     | 58.8 | 42.9 | 19+21 |
|         |   |    |                                                                                                                                          |   |     |     |                             | Lu2862R | CAGCCGCAAACATTA ACTTG      | 59.4 | 45   | 20    |
| Lu2863  | 1 | p2 | (AT)18                                                                                                                                   | 9 | 353 | 357 | 359 365 367 373 375 379 381 | Lu2863F | CTTTGCATGTGCTTAGCTTCC      | 60   | 47.6 | 19+21 |
|         |   |    |                                                                                                                                          |   |     |     |                             | Lu2863R | GTTGACAATTA AATCTGACCAGACC | 60.2 | 40   | 25    |
| Lu2865  | 1 | p4 | (TATT)7                                                                                                                                  | 2 | 306 | 302 |                             | Lu2865F | GCTCGAGTTCGACCAGTAGG       | 60   | 60   | 19+20 |
|         |   |    |                                                                                                                                          |   |     |     |                             | Lu2865R | CACATGCATTTCCAAGTTGC       | 60.1 | 45   | 20    |
| Lu2866  | 1 | p3 | (TCT)7                                                                                                                                   | 2 | 357 | 360 |                             | Lu2866F | TGCTGGACAGTAGAAGATGTTAGC   | 60   | 45.8 | 19+24 |
|         |   |    |                                                                                                                                          |   |     |     |                             | Lu2866R | GTCCTGCTTTATGCCTTTGC       | 59.9 | 50   | 20    |
| Lu2867  | 1 | p3 | (TGG)6                                                                                                                                   | 3 | 306 | 309 | 318                         | Lu2867F | CCGAGGTAGCAAGTGACTCC       | 59.9 | 60   | 19+20 |
|         |   |    |                                                                                                                                          |   |     |     |                             | Lu2867R | CCCTCTGCATCAACCTCTTC       | 59.8 | 55   | 20    |
| Lu2868  | 1 | p6 | (TTTTTG)5                                                                                                                                | 2 | 312 | 314 |                             | Lu2868F | GGAACGAAATCTTGCTGGAC       | 59.7 | 50   | 19+20 |
|         |   |    |                                                                                                                                          |   |     |     |                             | Lu2868R | CGGTGGTTTAAGCTCCATTG       | 60.5 | 50   | 20    |
| Lu2870  | 1 | c  | (AGA)7g(GAA)6gag(GAA)7                                                                                                                   | 2 | 280 | 317 |                             | Lu2870F | AGTCGGGACCCTTGAACTG        | 60.1 | 57.9 | 19+19 |
|         |   |    |                                                                                                                                          |   |     |     |                             | Lu2870R | ATTCGGCAGCTCTGTTGTTC       | 60.4 | 50   | 20    |
| Lu2871  | 1 | p3 | (AGC)6                                                                                                                                   | 2 | 341 | 344 |                             | Lu2871F | TCTTGGACCATCATTTTTACC      | 59.8 | 42.9 | 19+21 |
|         |   |    |                                                                                                                                          |   |     |     |                             | Lu2871R | ATGACTGCGCAAAATGTCC        | 59.7 | 47.4 | 19    |
| Lu2873  | 1 | p2 | (CT)13                                                                                                                                   | 3 | 304 | 306 | 312                         | Lu2873F | ACAGCGCACACCTACTTGG        | 59.9 | 57.9 | 19+19 |
|         |   |    |                                                                                                                                          |   |     |     |                             | Lu2873R | TTCCGATTCTGTTGCAAGG        | 59.8 | 47.4 | 19    |
| Lu2874  | 1 | p3 | (CTT)8                                                                                                                                   | 2 | 256 | 259 |                             | Lu2874F | TAACCTGGAGGAGGATGGTG       | 59.9 | 55   | 19+20 |
|         |   |    |                                                                                                                                          |   |     |     |                             | Lu2874R | ATAAACCCAGCCAACGGAATG      | 59.8 | 45   | 20    |
| Lu2875  | 1 | p3 | (TAA)10                                                                                                                                  | 2 | 214 | 217 |                             | Lu2875F | TGTTGAGACTTGAGAGCTTCCTC    | 60.2 | 47.8 | 19+23 |

|         |   |    |                                                                                              |   |      |     |         |                        |                            |                        |       |       |       |
|---------|---|----|----------------------------------------------------------------------------------------------|---|------|-----|---------|------------------------|----------------------------|------------------------|-------|-------|-------|
| Lu2878  | 1 | p5 | (ATTAA)5                                                                                     | 2 | 308  | 313 | Lu2875R | TACCGGTGGCTTTCCAGTAG   | 60.1                       | 55                     | 20    |       |       |
|         |   |    |                                                                                              |   |      |     | Lu2878F | TATTGGCCGTTGGATCTTTC   | 59.9                       | 45                     | 19+20 |       |       |
| Lu2880  | 1 | p3 | (GCT)8                                                                                       | 2 | 387  | 396 | Lu2878R | ACAAAGCGGATAGCTTGTCG   | 60.4                       | 50                     | 20    |       |       |
|         |   |    |                                                                                              |   |      |     | Lu2880F | CCACAGCCATTGTTTATTTGG  | 60.2                       | 42.9                   | 19+21 |       |       |
| Lu2881  | 1 | c  | (TCT)12tcg(TCT)6                                                                             | 2 | 321  | 325 | Lu2880R | GCCATTGATGAGTGATGTCG   | 60.1                       | 50                     | 20    |       |       |
|         |   |    |                                                                                              |   |      |     | Lu2881F | AAGAAACTCGGTGGTGATGG   | 60                         | 50                     | 19+20 |       |       |
|         |   |    |                                                                                              |   |      |     | Lu2881R | ATTTGGAGGAGCCACAAGG    | 60.1                       | 52.6                   | 19    |       |       |
| Lu2883  | 1 | p3 | (CTC)7                                                                                       | 3 | 203  | 206 | 209     | Lu2883F                | CGCTCACGTGATACCATACG       | 60.2                   | 55    | 19+20 |       |
|         |   |    |                                                                                              |   |      |     |         | Lu2883R                | GATCCCGTCAAATCTATTCTGC     | 59.9                   | 45.5  | 22    |       |
| Lu2884  | 1 | p3 | (TAT)10                                                                                      | 2 | 499  | 505 | Lu2884F | CCCTTCATGAATCATTCTCTCT | 58.6                       | 34.8                   | 19+23 |       |       |
|         |   |    |                                                                                              |   |      |     |         | Lu2884R                | TGCTTGGTCTCTTGGCATT        | 59.4                   | 45    | 20    |       |
| Lu2885  | 1 | p4 | (TTCT)9                                                                                      | 2 | 277  | 285 | Lu2885F | TAACATGTGGATGCCGAGAG   | 59.7                       | 50                     | 19+20 |       |       |
|         |   |    |                                                                                              |   |      |     |         | Lu2885R                | AGCCAATTAGGTTCCCAAC        | 60.2                   | 50    | 20    |       |
| Lu2886  | 1 | p3 | (TCC)6                                                                                       | 2 | 399  | 402 | Lu2886F | TGCAGCTCAAATACGGACAG   | 60                         | 50                     | 19+20 |       |       |
|         |   |    |                                                                                              |   |      |     |         | Lu2886R                | GCCAACGAGATCAGCTAAGG       | 60                     | 55    | 20    |       |
| Lu2887  | 1 | p2 | (AT)10                                                                                       | 2 | 300  | 320 | Lu2887F | CGGGACGAACTTGAAAAGG    | 60.6                       | 52.6                   | 19+19 |       |       |
|         |   |    |                                                                                              |   |      |     |         | Lu2887R                | GAAGAAAAGGAAGAGCATCAGC     | 59.6                   | 45.5  | 22    |       |
| Lu2888  | 1 | p3 | (AAC)7                                                                                       | 2 | 259  | 262 | Lu2888F | TTATTGGCCTGCCTCTTAGC   | 59.5                       | 50                     | 19+20 |       |       |
|         |   |    |                                                                                              |   |      |     |         | Lu2888R                | TTGGAAGACGATGCAGTTTG       | 59.8                   | 45    | 20    |       |
| Lu2889  | 1 | p2 | (AG)11                                                                                       | 2 | 297  | 299 | Lu2889F | CTAAGCTCCCGCTGTTGTTT   | 60                         | 55                     | 19+20 |       |       |
|         |   |    |                                                                                              |   |      |     |         | Lu2889R                | TGCCTGCTATACACACAGTTCAC    | 60.2                   | 47.8  | 23    |       |
| Lu2890  | 1 | p2 | (TA)15                                                                                       | 3 | 190  | 208 | 212     | Lu2890F                | TGTCATCATTATACCACTTTGTGA   | 58.5                   | 32    | 19+25 |       |
|         |   |    |                                                                                              |   |      |     |         | Lu2890R                | GATGTTTTTACAGAGGTATGTTTTCC | 58.6                   | 34.6  | 26    |       |
| Lu2894  | 1 | p3 | (TGC)8                                                                                       | 2 | 197  | 206 | Lu2894F | TCGGAATTGTGGGTAATACG   | 59.7                       | 42.9                   | 19+21 |       |       |
|         |   |    |                                                                                              |   |      |     |         | Lu2894R                | CCCTAAACCACACGAACACC       | 60.3                   | 55    | 20    |       |
|         |   |    | (GAA)6gaggaaatagaattgcagagaagaa<br>actgggggaaatggcttagaattgaagtgctgag<br>tcgaagaagaaga(AGT)6 | 2 | 216  | 219 | Lu2895a | TGGTGAGTTTACCTCGAGTCC  | 59.2                       | 52.4                   | 19+21 |       |       |
| Lu2895a | 2 | c  |                                                                                              | 2 | 206  | 212 | Lu2895b | TTCATTCACATCTCCCTTTCAC | 59                         | 40.9                   | 22    |       |       |
| Lu2898  | 1 | p2 | (AT)10                                                                                       | 2 | 213  | 215 | Lu2898F | GAAAGCCCACGGTATTGACT   | 59.1                       | 50                     | 19+20 |       |       |
|         |   |    |                                                                                              |   |      |     |         | Lu2898R                | GTTGGAGTTGGCCCTATGAA       | 59.9                   | 50    | 20    |       |
| Lu2899  | 1 | p2 | (TA)10                                                                                       | 3 | null | 274 | 280     | Lu2899F                | AAACGTTATCCGGCCAATC        | 59.8                   | 47.4  | 19+19 |       |
|         |   |    |                                                                                              |   |      |     |         | Lu2899R                | AAGCCGTTTTTCTTTCAGAGAC     | 59.1                   | 40.9  | 22    |       |
| Lu2901  | 1 | p2 | (GA)17                                                                                       | 4 | 232  | 234 | 236     | 244                    | Lu2901F                    | TGCTTCTGCAAATTAGGATCG  | 60.4  | 42.9  | 19+21 |
|         |   |    |                                                                                              |   |      |     |         |                        | Lu2901R                    | TGACAGCAGGACACTGAAGC   | 59.1  | 45    | 20    |
| Lu2905  | 1 | p4 | (ATGT)6                                                                                      | 2 | 322  | 326 | Lu2905F | CACTACTAGAAATGCCCAACC  | 59.9                       | 50                     | 19+22 |       |       |
|         |   |    |                                                                                              |   |      |     |         |                        | Lu2905R                    | AAGCTGCAATGTGGAGTGC    | 60    | 52.6  | 19    |
| Lu2907  | 1 | p2 | (GA)11                                                                                       | 2 | 288  | 290 | Lu2907F | GGTTGAAGCAACCAAAAAGG   | 59.6                       | 45                     | 19+20 |       |       |
|         |   |    |                                                                                              |   |      |     |         |                        | Lu2907R                    | TGGCATGCTTTACTTGTACCC  | 60    | 47.6  | 21    |
| Lu2908  | 1 | p2 | (AT)11                                                                                       | 4 | 348  | 350 | 352     | 356                    | Lu2908F                    | TGCAGCACCAATATAATTCCAC | 59.9  | 40.9  | 19+22 |
|         |   |    |                                                                                              |   |      |     |         |                        | Lu2908R                    | TCGGTGGTTAGTGTGATTGC   | 59.6  | 50    | 20    |
| Lu2909  | 1 | p3 | (ATT)9                                                                                       | 2 | 347  | 353 | Lu2909F | AGGGCCGATTTGTTAACTTG   | 59.1                       | 45                     | 19+20 |       |       |

|         |   |    |          |   |      |                 |         |                            |      |      |       |
|---------|---|----|----------|---|------|-----------------|---------|----------------------------|------|------|-------|
| Lu2911  | 1 | p2 | (CA)10   | 2 | 277  | 279             | Lu2909R | CCTTCACCTAGCTCACTTTACTTG   | 58.7 | 45.8 | 24    |
|         |   |    |          |   |      |                 | Lu2911F | CGATGCTTGTTTTGAAGTGC       | 59.5 | 45   | 19+20 |
| Lu2912  | 1 | p4 | (AGAA)8  | 2 | 316  | 332             | Lu2911R | CTGACACGAATGGAAGTGC        | 59.3 | 50   | 20    |
|         |   |    |          |   |      |                 | Lu2912F | CAAAGGGACAAAACAGAAGAGG     | 60.1 | 45.5 | 19+22 |
| Lu2913  | 1 | p3 | (CTT)7   | 3 | 215  | 218 224         | Lu2912R | TTCCCTTTCCCATCTCTGG        | 60   | 52.6 | 19    |
|         |   |    |          |   |      |                 | Lu2913F | GCTCTGCTCGCTGGTTAGAG       | 60.4 | 60   | 19+20 |
| Lu2914  | 1 | p3 | (TCT)6   | 2 | 223  | 226             | Lu2913R | GAGAGCAGCTGCAGTGATTG       | 59.9 | 55   | 20    |
|         |   |    |          |   |      |                 | Lu2914F | TTCGGCAGACAGTTCTCCTC       | 60.5 | 55   | 19+20 |
| Lu2916  | 1 | p3 | (GAA)8   | 2 | 207  | 213             | Lu2914R | TGGTTGCTTAGGGAATGATTG      | 59.9 | 42.9 | 21    |
|         |   |    |          |   |      |                 | Lu2916F | CTGTGAACATTCCCAACG         | 59.9 | 52.6 | 19+19 |
| Lu2917a | 2 | p3 | (GAA)9   | 3 | 200  | 209 215         | Lu2916R | CAAGCAACCCACGTTTCC         | 60.1 | 55.6 | 18    |
| Lu2917b |   |    |          | 2 | 191  | 194             | Lu2917F | TCGTCGAGAATCATGTCTTCC      | 60.2 | 47.6 | 19+21 |
| Lu2918  | 1 | p3 | (TCT)6   | 3 | 285  | 291 294         | Lu2917R | TCACTTCCAATCCAAAATACC      | 60.1 | 40.9 | 22    |
|         |   |    |          |   |      |                 | Lu2918F | ACGTACCAGACAGGCAGACC       | 60.2 | 60   | 19+20 |
| Lu2921  | 1 | p3 | (AAT)9   | 4 | 317  | 320 323 332     | Lu2918R | GGCTAGAAAAGAGGGCAAATG      | 60.2 | 47.6 | 21    |
|         |   |    |          |   |      |                 | Lu2921F | CTGTGGCAGAAGATGCAGAG       | 59.7 | 55   | 19+20 |
| Lu2923  | 1 | p2 | (AT)12   | 5 | 219  | 227 229 235 237 | Lu2921R | TGAGCCACCAGTTTCATTTG       | 59.7 | 45   | 20    |
|         |   |    |          |   |      |                 | Lu2923F | TTGCACCCGATACATATTCC       | 58.3 | 45   | 19+20 |
| Lu2926  | 1 | p2 | (TA)21   | 3 | 205  | 225 235         | Lu2923R | CTAGCCTTTCTTGTTGAAGG       | 58.1 | 47.6 | 21    |
|         |   |    |          |   |      |                 | Lu2926F | TGGATTTGGAGCAGTGATACC      | 59.9 | 47.6 | 19+21 |
| Lu2927  | 1 | p3 | (AGA)11  | 3 | 187  | 190 193         | Lu2926R | GAGCCAGCTACTGCCGATAC       | 60   | 60   | 20    |
|         |   |    |          |   |      |                 | Lu2927F | ATTTGTTTATGGAGAAGAATCTGATG | 59   | 30.8 | 19+26 |
| Lu2928  | 1 | p3 | (AGA)6   | 2 | 196  | 199             | Lu2927R | TGTCAATATCTAGTGAGACAGACACG | 59.8 | 42.3 | 26    |
|         |   |    |          |   |      |                 | Lu2928F | ACGGGTTTGTCTTGAAATGC       | 60   | 45   | 19+20 |
| Lu2929  | 1 | p3 | (AGA)8   | 2 | 230  | 233             | Lu2928R | TTGGAGTATGTGTGGGGTTTC      | 59.7 | 47.6 | 21    |
|         |   |    |          |   |      |                 | Lu2929F | TCTTCCTTTACCGTGAAAACG      | 60.5 | 40.9 | 19+22 |
| Lu2930  | 1 | p3 | (GAG)6   | 2 | 302  | 308             | Lu2929R | CCTTGCATCGAGAAGTTTCC       | 59.8 | 50   | 20    |
|         |   |    |          |   |      |                 | Lu2930F | CTTCGAACCCAATTTTCTGC       | 59.7 | 45   | 19+20 |
| Lu2931  | 1 | p2 | (AG)9    | 2 | 222  | 224             | Lu2930R | TCCTCTCTCACTGTTTCTCTCAAC   | 59.2 | 45.8 | 24    |
|         |   |    |          |   |      |                 | Lu2931F | CCAAACATGAAACCAGAGAGC      | 59.7 | 47.6 | 19+21 |
| Lu2932a | 2 | p5 | (AATAG)5 | 2 | null | 338             | Lu2931R | CTTGATCTTCCGGTACTGC        | 59.7 | 55   | 20    |
| Lu2932b |   |    |          | 2 | null | 318             | Lu2932F | TATTGCAAACGGACAAGTGC       | 59.7 | 45   | 19+20 |
| Lu2935  | 1 | p4 | (AATT)6  | 2 | 187  | 195             | Lu2932R | CGTATGACATGCAACCAAGC       | 60.1 | 50   | 20    |
|         |   |    |          |   |      |                 | Lu2935F | GACGTGAAGAAGTGGAAGC        | 59.9 | 55   | 19+20 |
| Lu2936  | 1 | p2 | (AG)12   | 2 | 353  | 355             | Lu2935R | GGTGAATTGTCAGCAAATGG       | 59   | 45   | 20    |
|         |   |    |          |   |      |                 | Lu2936F | GGTCAAGGCTGAGAAATTGG       | 59.7 | 50   | 19+20 |
| Lu2937  | 1 | p3 | (GAT)6   | 2 | 238  | 244             | Lu2936R | TGCCAAACACGTCCTTAGTG       | 59.8 | 50   | 20    |
|         |   |    |          |   |      |                 | Lu2937F | CCAATGTCTGCATTTCTTGC       | 59.3 | 45   | 19+20 |
| Lu2938  | 1 | p3 | (GGT)6   | 2 | 336  | 339             | Lu2937R | ACCGATTGCAACCAGAAGG        | 60.1 | 52.6 | 19    |
|         |   |    |          |   |      |                 | Lu2938F | CCGAAGTCAGCGAGAAAAG        | 60.1 | 50   | 19+20 |
| Lu2939a | 2 | p3 | (TGT)6   | 2 | 311  | 314             | Lu2938R | CATTTGTTGGGCGGTTTATC       | 60.2 | 45   | 20    |
|         |   |    |          |   |      |                 | Lu2939F | ATTCGTGTTGGTCACTGAAGG      | 60   | 47.6 | 19+21 |

|         |   |    |         |   |     |     |     |     |         |                            |                      |      |       |       |
|---------|---|----|---------|---|-----|-----|-----|-----|---------|----------------------------|----------------------|------|-------|-------|
| Lu2939b |   |    |         | 2 | 288 | 291 |     |     | Lu2939R | AGCAGCAACAAGGTCAACG        | 60                   | 52.6 | 19    |       |
| Lu2940  | 1 | p3 | (AAG)7  | 2 | 261 | 282 |     |     | Lu2940F | AGGTGGCTGATTGAAAAATCC      | 60.3                 | 42.9 | 19+21 |       |
|         |   |    |         |   |     |     |     |     | Lu2940R | CAAAATTA CTTCAGGGGAATGC    | 59.8                 | 40.9 | 22    |       |
| Lu2942  | 1 | p2 | (CT)9   | 2 | 191 | 195 |     |     | Lu2942F | AAGGAAAGGGAAGGCTCATC       | 59.7                 | 50   | 19+20 |       |
|         |   |    |         |   |     |     |     |     | Lu2942R | TCGTGGAATTAATTGCGTCTC      | 60.1                 | 42.9 | 21    |       |
| Lu2943  | 1 | p3 | (GAA)6  | 4 | 194 | 209 | 218 | 224 | Lu2943F | CCGATGATCATGCCCTAAAG       | 60.4                 | 50   | 19+20 |       |
|         |   |    |         |   |     |     |     |     | Lu2943R | AGAGATCGGTGATGGGTTTG       | 59.9                 | 50   | 20    |       |
| Lu2944  | 1 | p2 | (TA)12  | 4 | 259 | 261 | 263 | 267 | Lu2944F | TTTTCACGTCGACAAAATGC       | 59.7                 | 40   | 19+20 |       |
|         |   |    |         |   |     |     |     |     | Lu2944R | CGATATGGACAACCCAACG        | 59.8                 | 52.6 | 19    |       |
| Lu2945  | 1 | p2 | (TA)9   | 2 | 317 | 319 |     |     | Lu2945F | CAGAAAGCCGACAGAAAAGG       | 60                   | 50   | 19+20 |       |
|         |   |    |         |   |     |     |     |     | Lu2945R | GCCATCTTCAGTCTTGTGTATCC    | 60                   | 47.8 | 23    |       |
| Lu2947  | 1 | p3 | (TTC)9  | 2 | 271 | 274 |     |     | Lu2947F | GTTGCAGTTGTGCATTCTGG       | 60.3                 | 50   | 19+20 |       |
|         |   |    |         |   |     |     |     |     | Lu2947R | TCTGCAGCTTCCAATTCCCTC      | 60.5                 | 50   | 20    |       |
| Lu2948  | 1 | p3 | (AGT)10 | 2 | 284 | 287 |     |     | Lu2948F | ACGCAGGACGTTCTTATTCAC      | 59.3                 | 47.6 | 19+21 |       |
|         |   |    |         |   |     |     |     |     | Lu2948R | GAAGCTGAAGGGTGCAGAAC       | 60                   | 55   | 20    |       |
| Lu2949  | 1 | p3 | (GAA)6  | 2 | 272 | 275 |     |     | Lu2949F | GAAAAACGGGAGGGAGAAAG       | 60                   | 50   | 19+20 |       |
|         |   |    |         |   |     |     |     |     | Lu2949R | ATCACCGGCTTCATTTTCATC      | 59.9                 | 45   | 20    |       |
| Lu2950  | 1 | p2 | (TA)13  | 5 | 316 | 324 | 338 | 344 | 358     | Lu2950F                    | TGTGGGTGTACCGAAGTTCA | 60   | 50    | 19+20 |
|         |   |    |         |   |     |     |     |     | Lu2950R | GCCACATCATCATGACCACT       | 59.4                 | 50   | 20    |       |
| Lu2951  | 1 | p2 | (TA)17  | 2 | 235 | 237 |     |     | Lu2951F | TACCGTGGGA ACTGGTAAGC      | 60                   | 55   | 19+20 |       |
|         |   |    |         |   |     |     |     |     | Lu2951R | TGAGCCAATGCTCACAAAAC       | 59.8                 | 45   | 20    |       |
| Lu2955  | 1 | p2 | (AG)10  | 2 | 279 | 285 |     |     | Lu2955F | TGTTCCCGCTCTCACTTCTC       | 60.5                 | 55   | 19+20 |       |
|         |   |    |         |   |     |     |     |     | Lu2955R | TGATTACGCCGCCTCTATTC       | 60.2                 | 50   | 20    |       |
| Lu2956a | 2 | p3 | (TTA)6  | 2 | 282 | 291 |     |     | Lu2956F | AGCCAATGGAAATTCTGGTG       | 59.9                 | 45   | 19+20 |       |
| Lu2956b |   |    |         | 2 | 229 | 232 |     |     | Lu2956R | TGCTTTGCTACATGCGAAAC       | 60                   | 45   | 20    |       |
| Lu2957  | 1 | p2 | (AG)18  | 4 | 354 | 356 | 364 | 366 | Lu2957F | GAGGTTGTCAATTCCGTTGG       | 60.4                 | 50   | 19+20 |       |
|         |   |    |         |   |     |     |     |     | Lu2957R | GTGTTTACGCTCATCCTTTGC      | 59.8                 | 47.6 | 21    |       |
| Lu2959  | 1 | p3 | (AAG)6  | 2 | 330 | 336 |     |     | Lu2959F | ACCCTGCAACCTATCTGTGG       | 60                   | 55   | 19+20 |       |
|         |   |    |         |   |     |     |     |     | Lu2959R | AGGATGTTATTGGGCAATCG       | 59.8                 | 45   | 20    |       |
| Lu2963  | 1 | p3 | (ATC)6  | 2 | 231 | 234 |     |     | Lu2963F | GCTTAGGTGGAGCAGGTCAG       | 60                   | 60   | 19+20 |       |
|         |   |    |         |   |     |     |     |     | Lu2963R | ATGAAATCAGGGGCAGTTTG       | 59.9                 | 45   | 20    |       |
| Lu2965  | 1 | p3 | (AAT)8  | 2 | 352 | 355 |     |     | Lu2965F | GTCGGCGTTCTTGAATTAGG       | 59.7                 | 50   | 19+20 |       |
|         |   |    |         |   |     |     |     |     | Lu2965R | AGGCCTCTCTTCCATCTTCC       | 59.8                 | 55   | 20    |       |
| Lu2966  | 1 | p2 | (AT)10  | 3 | 280 | 288 | 290 |     | Lu2966F | TTTAGTTGGCAGATCGAGAG       | 55.7                 | 45   | 19+20 |       |
|         |   |    |         |   |     |     |     |     | Lu2966R | ATACACATTTCACTTAGCTTTGTTAC | 55.3                 | 30.8 | 26    |       |
| Lu2968  | 1 | p3 | (TAA)9  | 4 | 334 | 355 | 358 | 361 | Lu2968F | TGATGAATTGATGGTGGTGAG      | 59.4                 | 42.9 | 19+21 |       |
|         |   |    |         |   |     |     |     |     | Lu2968R | CCAACCTTGCATGAACACTG       | 60.2                 | 50   | 20    |       |
| Lu2971  | 1 | p2 | (AT)10  | 3 | 224 | 226 | 230 |     | Lu2971F | CTGCAGCAGAGAACATACGG       | 59.6                 | 55   | 19+20 |       |
|         |   |    |         |   |     |     |     |     | Lu2971R | ATTTTGCATTTCCACGTTCC       | 59.8                 | 40   | 20    |       |
| Lu2972  | 1 | p2 | (AT)9   | 2 | 307 | 309 |     |     | Lu2972F | ATAACGTCCGACCCTCTCG        | 60.1                 | 57.9 | 19+19 |       |
|         |   |    |         |   |     |     |     |     | Lu2972R | TTTTGCAGCCTTAGATTCTCG      | 59.6                 | 42.9 | 21    |       |
| Lu2974  | 1 | p2 | (TA)15  | 4 | 235 | 237 | 239 | 241 | Lu2974F | AGAAAAGCTTCTGGCATTCCG      | 59.6                 | 45   | 19+20 |       |



|         |   |    |              |   |      |     |         |                           |                           |                          |                      |       |    |    |
|---------|---|----|--------------|---|------|-----|---------|---------------------------|---------------------------|--------------------------|----------------------|-------|----|----|
| Lu2975  | 1 | p3 | (TCT)7       | 2 | null | 204 | Lu2974R | CCCCATTGCTATGTTTCATCC     | 60.2                      | 50                       | 20                   |       |    |    |
|         |   |    |              |   |      |     | Lu2975F | GCTTGAGCAGCAAGCTAACC      | 60.3                      | 55                       | 19+20                |       |    |    |
| Lu2976  | 1 | p2 | (AG)9        | 2 | 344  | 348 | Lu2975R | TGGGCGGAAGAGATAATCAG      | 60.2                      | 50                       | 20                   |       |    |    |
|         |   |    |              |   |      |     | Lu2976F | ATGTCGTCCATTGATTTCTCTG    | 59.8                      | 42.9                     | 19+21                |       |    |    |
| Lu2979  | 1 | p3 | (TCC)6       | 2 | 319  | 322 | Lu2976R | TCAACGCCATTCTTTCTTCC      | 60.2                      | 45                       | 20                   |       |    |    |
|         |   |    |              |   |      |     | Lu2979F | GCCGTAGCACCTTAGATTCCG     | 59.9                      | 55                       | 19+20                |       |    |    |
| Lu2980  | 1 | p2 | (AT)15       | 2 | 215  | 217 | Lu2979R | CAGCAAAGCTGTGAAGAGTCC     | 60.2                      | 52.4                     | 21                   |       |    |    |
|         |   |    |              |   |      |     | Lu2980F | TCTGGATTTGGATTGGTTCTG     | 59.9                      | 42.9                     | 19+21                |       |    |    |
| Lu2981  | 1 | p3 | (AAT)14      | 3 | 306  | 315 | 318     | Lu2980R                   | CTGCTCAATGTTCAAGTCCCTC    | 59.9                     | 52.4                 | 21    |    |    |
|         |   |    |              |   |      |     | Lu2981F | AGCAAAAAGCAAACGTAGGG      | 59.4                      | 45                       | 19+20                |       |    |    |
| Lu2983  | 1 | c  | (TAT)7(TGT)9 | 4 | 260  | 263 | 266     | 272                       | Lu2981R                   | GGAATCATCTGTAGGTAGGTGAGG | 60.3                 | 50    | 24 |    |
|         |   |    |              |   |      |     | Lu2983F | GGACACCACCAACAACAGC       | 60                        | 57.9                     | 19+19                |       |    |    |
| Lu2984  | 1 | p2 | (TC)20       | 2 | 206  | 218 | Lu2983R | TTCCCTTTTCCATTCATCTCC     | 60.3                      | 42.9                     | 21                   |       |    |    |
|         |   |    |              |   |      |     | Lu2984F | CACCTTTGTGTTTTGCATCC      | 59                        | 45                       | 19+20                |       |    |    |
| Lu2985  | 1 | p2 | (TA)19       | 3 | null | 335 | 337     | Lu2984R                   | ATGGTGTGTTGTGCGTAGC       | 59.6                     | 50                   | 20    |    |    |
|         |   |    |              |   |      |     | Lu2985F | AGGAAACAAGCATGGAGAGG      | 59.3                      | 50                       | 19+20                |       |    |    |
| Lu2991  | 1 | p2 | (AG)12       | 3 | 245  | 257 | 259     | Lu2985R                   | TTGAATGACATGGTATCACACATAC | 58.7                     | 36                   | 25    |    |    |
|         |   |    |              |   |      |     | Lu2991F | GGGAGAAAGGGGAAAGGAG       | 60                        | 57.9                     | 19+19                |       |    |    |
| Lu2992  | 1 | p2 | (AT)12       | 4 | 309  | 317 | 319     | 321                       | Lu2991R                   | TTTGCAGTTTTGGGGATAG      | 59.9                 | 45    | 20 |    |
|         |   |    |              |   |      |     | Lu2992F | TTCTACGTGCGAGGGTTGAATG    | 60.1                      | 47.6                     | 19+21                |       |    |    |
| Lu2993  | 1 | p2 | (CT)16       | 3 | 221  | 231 | 233     | Lu2992R                   | CACAATTTTGACACGATGTGG     | 59.9                     | 42.9                 | 21    |    |    |
|         |   |    |              |   |      |     | Lu2993F | GATCAGCCACCATCTCTATGC     | 59.7                      | 52.4                     | 19+21                |       |    |    |
| Lu2995  | 1 | p3 | (CTC)7       | 2 | 367  | 370 | Lu2993R | TTTGGATCCTCAACCATTCC      | 59.7                      | 45                       | 20                   |       |    |    |
|         |   |    |              |   |      |     | Lu2995F | CATAACATGTCGGGCATCC       | 59.7                      | 52.6                     | 19+19                |       |    |    |
| Lu2996  | 1 | p3 | (GAA)11      | 4 | 238  | 247 | 250     | 253                       | Lu2995R                   | CACAGTGATCTCCACCATCG     | 60.1                 | 55    | 20 |    |
|         |   |    |              |   |      |     | Lu2996F | AGCCTCTGCGTTTTCTTTCAG     | 59.8                      | 50                       | 19+20                |       |    |    |
| Lu2997  | 1 | p3 | (GAC)6       | 2 | 264  | 267 | Lu2996R | GGCAGACTCTCGCTGGTTAG      | 60.2                      | 60                       | 20                   |       |    |    |
|         |   |    |              |   |      |     | Lu2997F | AAGAGCATGTGGACCTCACC      | 60.1                      | 55                       | 19+20                |       |    |    |
| Lu2999a | 2 | p3 | (TTC)10      | 2 | 362  | 365 | Lu2997R | TCACAACCCAACCCAACC        | 60.2                      | 55.6                     | 18                   |       |    |    |
| Lu2999b |   |    |              | 3 | 337  | 339 | 341     | Lu2999F                   | TCCCTGCATCACTAAAACACC     | 60                       | 47.6                 | 19+21 |    |    |
| Lu3001  | 1 | p2 | (AT)19       | 5 | 305  | 307 | 311     | 320                       | 325                       | Lu2999R                  | ACAGGATTTATGGCGACTGG | 60    | 50 | 20 |
|         |   |    |              |   |      |     | Lu3001F | GAAAGCTGGTAAAAGTGAAGTCAAC | 59.8                      | 40                       | 19+25                |       |    |    |
| Lu3003  | 1 | p3 | (AAT)12      | 2 | 273  | 276 | Lu3001R | CAAAAGCCGGAATGAAAAAG      | 59.7                      | 40                       | 20                   |       |    |    |
|         |   |    |              |   |      |     | Lu3003F | AGAATCGGACTCCCTTTTCC      | 59.5                      | 50                       | 19+20                |       |    |    |
| Lu3004  | 1 | p3 | (AGA)6       | 2 | 340  | 343 | Lu3003R | TTTTAGACGTTATCACAGGAGTGC  | 59.7                      | 41.7                     | 24                   |       |    |    |
|         |   |    |              |   |      |     | Lu3004F | TCTTCAATTGGTGTGCAACG      | 60.7                      | 45                       | 19+20                |       |    |    |
| Lu3007  | 1 | p3 | (TCA)7       | 2 | 251  | 257 | Lu3004R | GAACTCGCTGAGTCGAATGG      | 60.9                      | 55                       | 20                   |       |    |    |
|         |   |    |              |   |      |     | Lu3007F | TCTCTGCTGACCCTGCATC       | 60.1                      | 57.9                     | 19+19                |       |    |    |
| Lu3010  | 1 | p2 | (CT)9        | 2 | 333  | 337 | Lu3007R | TCCGTCTTCAGCACAGATTG      | 60                        | 50                       | 20                   |       |    |    |
|         |   |    |              |   |      |     | Lu3010F | CAATCCTTCCATCGATCTCC      | 59.4                      | 50                       | 19+20                |       |    |    |
| Lu3013  | 1 | p2 | (CT)16       | 3 | 180  | 198 | 200     | Lu3010R                   | TCTAGGATTGCCCGAGAAAG      | 59.4                     | 50                   | 20    |    |    |
|         |   |    |              |   |      |     | Lu3013F | GGCATGATATGAGTGTTTAGTTGG  | 59.8                      | 41.7                     | 19+24                |       |    |    |

|        |   |    |                                                                          |   |      |             |         |                          |      |      |       |
|--------|---|----|--------------------------------------------------------------------------|---|------|-------------|---------|--------------------------|------|------|-------|
| Lu3014 | 1 | p2 | (AG)9                                                                    | 2 | 202  | 204         | Lu3013R | TTGATAGAGCTCACAACCTTTCC  | 59.8 | 43.5 | 23    |
|        |   |    |                                                                          |   |      |             | Lu3014F | CAAAACCTGTGGTGGTTGG      | 59.8 | 52.6 | 19+19 |
| Lu3015 | 1 | p2 | (TA)9                                                                    | 2 | 285  | 287         | Lu3014R | TTTTCTCCAGCTTCCAATCG     | 60.3 | 45   | 20    |
|        |   |    |                                                                          |   |      |             | Lu3015F | TTACAGCAATGCAGCTGACC     | 60   | 50   | 19+20 |
| Lu3016 | 1 | p3 | (TGA)6                                                                   | 2 | 256  | 262         | Lu3015R | TCAAAGAGACAGAAGAGCAAGC   | 60.3 | 43.5 | 23    |
|        |   |    |                                                                          |   |      |             | Lu3016F | TGCAGCTGTTTGTGCTAACC     | 60.1 | 50   | 19+20 |
| Lu3017 | 1 | p3 | (TTC)10                                                                  | 4 | 347  | 350 460 463 | Lu3016R | GATGGGGTCTTGATGTTTGG     | 60.2 | 50   | 20    |
|        |   |    |                                                                          |   |      |             | Lu3017F | CAATGAAGATTGCCATCACG     | 60.1 | 45   | 19+20 |
| Lu3019 | 1 | p3 | (CTT)6                                                                   | 2 | 286  | 289         | Lu3017R | TACCCAGGTCGGAAAAGTTG     | 60   | 50   | 20    |
|        |   |    |                                                                          |   |      |             | Lu3019F | GCATTCTATATGCGCTGCTTC    | 60   | 47.6 | 19+21 |
| Lu3020 | 1 | p2 | (TA)14                                                                   | 4 | 269  | 271 273 275 | Lu3019R | GGAATAGGATTCGGGCTAGG     | 59.9 | 55   | 20    |
|        |   |    |                                                                          |   |      |             | Lu3020F | TCAAATGATGCAAGTATCACAG   | 59.2 | 33.3 | 19+24 |
| Lu3022 | 1 | p3 | (AGA)7                                                                   | 3 | 352  | 361 367     | Lu3020R | GGAATTCTGTGCCTTTGAGC     | 59.8 | 50   | 20    |
|        |   |    |                                                                          |   |      |             | Lu3022F | GAGGAATTGAGCTCACAGCAG    | 60.1 | 52.4 | 19+21 |
| Lu3023 | 1 | p6 | (CCAAGA)5                                                                | 2 | 364  | 372         | Lu3022R | TGCCTCAGCGTGTTTATGAG     | 60   | 50   | 20    |
|        |   |    |                                                                          |   |      |             | Lu3023F | CCAACCAACACCATCATTTG     | 59.7 | 45   | 19+20 |
| Lu3024 | 1 | p3 | (TTC)6                                                                   | 2 | null | 375         | Lu3023R | ACATTGAACCCTTCCACCTG     | 59.8 | 50   | 20    |
|        |   |    |                                                                          |   |      |             | Lu3024F | GAACTTCATTTTCCAGGTACGG   | 59.9 | 45.5 | 19+22 |
| Lu3025 | 1 | p3 | (TTC)7                                                                   | 2 | 308  | 320         | Lu3024R | TTCATCAGCTTCCCATCTCC     | 60.2 | 50   | 20    |
|        |   |    |                                                                          |   |      |             | Lu3025F | GCACCCAATTTGGTTAGAG      | 59.4 | 50   | 19+20 |
| Lu3026 | 1 | p3 | (AAC)6                                                                   | 2 | 344  | 350         | Lu3025R | TTCCGGCCATGAATTAAC       | 59.8 | 40   | 20    |
|        |   |    |                                                                          |   |      |             | Lu3026F | GTCAGGATTCGGCTTGTCTC     | 59.8 | 55   | 19+20 |
| Lu3027 | 1 | p3 | (AAG)6                                                                   | 2 | 349  | 352         | Lu3026R | AGGATGCCAACATCTTTTCG     | 60.1 | 45   | 50    |
|        |   |    |                                                                          |   |      |             | Lu3027F | GTCTCGAAGGAACGGCTATG     | 59.8 | 55   | 19+20 |
| Lu3028 | 1 | p3 | (ATA)9                                                                   | 3 | 252  | 258 261     | Lu3027R | AATCCCACCAAACAACCTG      | 59.7 | 45   | 20    |
|        |   |    |                                                                          |   |      |             | Lu3028F | GGCAAGGAGAAACAAAGATCC    | 60.1 | 47.6 | 19+21 |
| Lu3030 | 1 | p3 | (GAA)7                                                                   | 2 | 205  | 208         | Lu3028R | ACTCTCACTCCCCAACAGC      | 59.3 | 55   | 20    |
|        |   |    |                                                                          |   |      |             | Lu3030F | AGGAAGAGCGACAAGACGAG     | 59.7 | 55   | 19+20 |
| Lu3031 | 1 | p3 | (TCT)6                                                                   | 2 | 306  | 312         | Lu3030R | GGTTGATGGCCACGATAGAT     | 59.8 | 50   | 20    |
|        |   |    |                                                                          |   |      |             | Lu3031F | TGCAAAAGGACCATGAATCTC    | 60.1 | 42.9 | 19+21 |
| Lu3033 | 1 | p2 | (AG)11                                                                   | 2 | 296  | 302         | Lu3031R | TTTGTTGGTTTGTCCCCTTC     | 59.8 | 45   | 20    |
|        |   |    |                                                                          |   |      |             | Lu3033F | TCAAGAAAGCATATGCAAGAACTC | 59.9 | 37.5 | 19+24 |
| Lu3034 | 1 | p3 | (AAT)9                                                                   | 3 | 330  | 333 339     | Lu3033R | TGTGGTACCTCCAGATGTCG     | 59.5 | 55   | 20    |
|        |   |    |                                                                          |   |      |             | Lu3034F | AGCAGTCCAAGACGACCAAT     | 59.7 | 50   | 19+20 |
|        |   |    | (AGA)9ggaggagagattcttctcaatcatca<br>aacttggagatggcatttgcctttcatatfff(TC) |   |      |             | Lu3034R | CCTGAAACCAAGCAAGTTCC     | 59.7 | 50   | 20    |
| Lu3035 | 1 | c  | 11                                                                       | 3 | 280  | 283 286     | Lu3035F | GGGGGAACGAAGAGAGAATC     | 60   | 55   | 19+20 |
|        |   |    |                                                                          |   |      |             | Lu3035R | GCTTCAGGGAAATCTGCAAC     | 59.8 | 50   | 20    |
| Lu3036 | 1 | p4 | (AGAA)5                                                                  | 3 | 322  | 330 346     | Lu3036F | TCAGATGGTTTGCTGCTGAC     | 60   | 50   | 19+20 |
|        |   |    |                                                                          |   |      |             | Lu3036R | ATCACCTTCCCCAAAACCTC     | 60.2 | 50   | 20    |
| Lu3038 | 1 | p3 | (ATA)7                                                                   | 4 | 300  | 303 312 315 | Lu3038F | TACCCTTGACCCAAGACAG      | 60   | 55   | 19+20 |

|         |   |    |                                                                   |   |      |     |     |         |                         |                      |      |       |       |
|---------|---|----|-------------------------------------------------------------------|---|------|-----|-----|---------|-------------------------|----------------------|------|-------|-------|
| Lu3039  | 1 | p3 | (CAA)11                                                           | 2 | 298  | 301 |     | Lu3038R | GCAAAGGTTGGTTTGAATGG    | 60.3                 | 45   | 20    |       |
|         |   |    |                                                                   |   |      |     |     | Lu3039F | TTCACCGTCATCTCACATCC    | 59.5                 | 50   | 19+20 |       |
|         |   |    |                                                                   |   |      |     |     | Lu3039R | TAAGCTCCGGAGACCAAAAC    | 59.3                 | 50   | 20    |       |
| Lu3040  | 1 | p4 | (CTAG)5                                                           | 2 | 350  | 362 |     | Lu3040F | CAATGATGAGCCACGTTGAC    | 60.1                 | 50   | 19+20 |       |
|         |   |    |                                                                   |   |      |     |     | Lu3040R | TTTGTGGGGAATATTGTCTGG   | 59.7                 | 42.9 | 21    |       |
| Lu3041  | 1 | p3 | (CTG)8                                                            | 2 | 268  | 277 |     | Lu3041F | TTTTGGGAATCCGAATGAAG    | 59.9                 | 40   | 19+20 |       |
|         |   |    |                                                                   |   |      |     |     | Lu3041R | ATGGCGTTCTCATTTTCGAC    | 60.1                 | 45   | 20    |       |
| Lu3042a | 2 | p2 | (GA)11                                                            | 3 | null | 264 | 266 | Lu3042F | CATCCCTCTCTCCAAAGTGC    | 59.8                 | 55   | 19+20 |       |
| Lu3042b |   |    |                                                                   | 2 | null | 248 |     | Lu3042R | AGTTTGGAAAGTGGGCTAACG   | 59.2                 | 50   | 20    |       |
| Lu3043  | 1 | p2 | (GA)16                                                            | 2 | 187  | 201 |     | Lu3043F | TTCCGAGAGAGGAGAGTTGG    | 59.5                 | 55   | 19+20 |       |
|         |   |    |                                                                   |   |      |     |     | Lu3043R | CAGAGGCGGGCAGATATAAA    | 60.2                 | 50   | 20    |       |
| Lu3044  | 1 | p3 | (GAA)8                                                            | 2 | 282  | 288 |     | Lu3044F | GACCCTCCTCCCAATAATCC    | 59.6                 | 55   | 19+20 |       |
|         |   |    |                                                                   |   |      |     |     | Lu3044R | ACATTATGAATCGGCTGTTGG   | 59.8                 | 42.9 | 21    |       |
|         |   |    | (GCA)8ggatcgttgaaagcattggagccgga<br>tacatctcctctctctcatcatc(TCT)7 | 2 | 299  | 302 |     | Lu3045F | CCCTTTCCAAGCCTGATAAAC   | 60                   | 47.6 | 19+21 |       |
| Lu3045  | 1 | c  |                                                                   |   |      |     |     | Lu3045R | TCCGTCTTCTCTCTGTTGACC   | 59.4                 | 52.4 | 21    |       |
| Lu3046  | 1 | p4 | (TATC)7                                                           | 2 | 247  | 259 |     | Lu3046F | GGCCATTCTTGATTTCTTGC    | 59.7                 | 45   | 19+20 |       |
|         |   |    |                                                                   |   |      |     |     | Lu3046R | AAGTCCCCTCCACATGTCTG    | 60                   | 55   | 20    |       |
| Lu3047  | 1 | p3 | (TCA)6                                                            | 2 | 205  | 208 |     | Lu3047F | TTTGCTCCGTCTCTGCATC     | 60.1                 | 52.6 | 19+19 |       |
|         |   |    |                                                                   |   |      |     |     | Lu3047R | TCTTTTCTGGGTTGTGTCCAG   | 60.1                 | 47.6 | 21    |       |
| Lu3049  | 1 | p3 | (CAA)13                                                           | 3 | 301  | 304 | 307 | Lu3049F | GATCCGCCTGATGATGATG     | 60                   | 52.6 | 19+19 |       |
|         |   |    |                                                                   |   |      |     |     | Lu3049R | ACCCAACGGAGACCAAAATC    | 59.8                 | 52.6 | 19    |       |
| Lu3052  | 1 | p2 | (TA)12                                                            | 4 | 271  | 277 | 281 | 283     | Lu3052F                 | CTCCACGCTCCTACGTTCTC | 60   | 60    | 19+20 |
|         |   |    |                                                                   |   |      |     |     | Lu3052R | TGTTCCCTTAGCTTGCTGCTG   | 59.4                 | 50   | 20    |       |
| Lu3053  | 1 | p2 | (AT)15                                                            | 4 | 226  | 228 | 232 | 236     | Lu3053F                 | TGGATTCATGCAAACGACTC | 59.7 | 45    | 19+20 |
|         |   |    |                                                                   |   |      |     |     | Lu3053R | TTGGCACCAACAATATAGCATC  | 59.9                 | 40.9 | 22    |       |
| Lu3056  | 1 | p5 | (GAAGA)7                                                          | 2 | 275  | 285 |     | Lu3056F | CACAATGGAGGCTCTGATACC   | 59.6                 | 52.4 | 19+21 |       |
|         |   |    |                                                                   |   |      |     |     | Lu3056R | GCAACATTACCCAGCAACG     | 60.1                 | 52.6 | 19    |       |
| Lu3057a | 2 | p3 | (AAT)7                                                            | 2 | 351  | 354 |     | Lu3057F | GAAGTGTGGGATAGCGAGTG    | 59.7                 | 52.4 | 19+21 |       |
| Lu3057b |   |    |                                                                   | 2 | 287  | 293 |     | Lu3057R | ATGAGAAGGTCGGGCAAAC     | 60.1                 | 52.6 | 19    |       |
| Lu3059  | 1 | p3 | (TTC)8                                                            | 3 | 297  | 306 | 309 | Lu3059F | GAAAAGGCCGATTCTTTGC     | 59.8                 | 47.4 | 19+19 |       |
|         |   |    |                                                                   |   |      |     |     | Lu3059R | TGTGGCATATCCACCACAAT    | 59.7                 | 45   | 20    |       |
| Lu3060  | 1 | p2 | (AT)11                                                            | 4 | 334  | 336 | 338 | 344     | Lu3060F                 | CGAATACAATGGAACCAACG | 58.9 | 45    | 19+20 |
|         |   |    |                                                                   |   |      |     |     | Lu3060R | TTGACCTTCGATGTGTTAAACC  | 59                   | 40.9 | 22    |       |
| Lu3061  | 1 | p3 | (GAT)6                                                            | 2 | 357  | 360 |     | Lu3061F | TGGAGGAGACAAGGAGGATG    | 60.2                 | 55   | 19+20 |       |
|         |   |    |                                                                   |   |      |     |     | Lu3061R | AATCTACCCCCTGCAAGTCC    | 60.3                 | 55   | 20    |       |
| Lu3063  | 1 | p3 | (CAT)6                                                            | 2 | 279  | 291 |     | Lu3063F | AGTGGGTCATCCCTTCAATG    | 59.8                 | 50   | 19+20 |       |
|         |   |    |                                                                   |   |      |     |     | Lu3063R | CCGAGGGATCAAAGATCAA     | 60                   | 45   | 20    |       |
| Lu3064  | 1 | p3 | (TTG)10                                                           | 3 | 195  | 201 | 207 | Lu3064F | TCCCTTCATTTGACCAATTC    | 57.4                 | 40   | 19+20 |       |
|         |   |    |                                                                   |   |      |     |     | Lu3064R | CAACCAGGAATCAAATGGAC    | 57.8                 | 45   | 20    |       |
| Lu3066  | 1 | p2 | (AT)18                                                            | 2 | 313  | 317 |     | Lu3066F | GGGTGAGACGTTCTTTACG     | 59.6                 | 55   | 19+20 |       |
|         |   |    |                                                                   |   |      |     |     | Lu3066R | CACATGTAGATCGCTAGCATACG | 59.8                 | 47.8 | 23    |       |

|         |   |    |         |   |      |     |     |     |         |                           |                       |      |       |       |
|---------|---|----|---------|---|------|-----|-----|-----|---------|---------------------------|-----------------------|------|-------|-------|
| Lu3068  | 1 | p3 | (GAA)13 | 4 | 348  | 351 | 354 | 357 | Lu3068F | TCAGGGTGTTTTGAGTTTCAG     | 57.8                  | 42.9 | 19+21 |       |
|         |   |    |         |   |      |     |     |     | Lu3068R | GACTCGGTCAAGAATCATGG      | 58.1                  | 50   | 20    |       |
| Lu3074  | 1 | p3 | (TGA)10 | 3 | 328  | 332 | 338 |     | Lu3074F | AGAACCCTGCAGGATCATTG      | 60.1                  | 50   | 19+20 |       |
|         |   |    |         |   |      |     |     |     | Lu3074R | ACTCCTTTCCGATTCCATCC      | 60.3                  | 50   | 20    |       |
| Lu3077  | 1 | p3 | (GAA)6  | 2 | 356  | 359 |     |     | Lu3077F | AGAGGACCGACCAAAATGC       | 60.1                  | 52.6 | 19+19 |       |
|         |   |    |         |   |      |     |     |     | Lu3077R | CCTCTCTTCGTGCATTCTC       | 60                    | 55   | 20    |       |
| Lu3078  | 1 | p2 | (TC)19  | 2 | 270  | 284 |     |     | Lu3078F | AGGGGGAAGACACAGATGAG      | 59.1                  | 55   | 19+20 |       |
|         |   |    |         |   |      |     |     |     | Lu3078R | CTTAAGGCTGTAAGAAGGTCAATG  | 58.6                  | 41.7 | 24    |       |
| Lu3080  | 1 | p3 | (TCT)6  | 2 | 209  | 215 |     |     | Lu3080F | TTGAACGAAACCCAGTCTC       | 60.1                  | 50   | 19+20 |       |
|         |   |    |         |   |      |     |     |     | Lu3080R | CGTCACCGTAACCACATCAG      | 60                    | 55   | 20    |       |
| Lu3082  | 1 | p2 | (TA)12  | 3 | 190  | 192 | 194 |     | Lu3082F | ACACATTGGAGTGTAGCTCAAG    | 57                    | 45.5 | 19+22 |       |
|         |   |    |         |   |      |     |     |     | Lu3082R | TCACATCACACTGTTTAGTAGATGG | 58.3                  | 40   | 25    |       |
| Lu3083  | 1 | p2 | (TA)13  | 3 | 359  | 361 | 363 |     | Lu3083F | TGGTGTGGCAATATGGTTTG      | 60.2                  | 45   | 19+20 |       |
|         |   |    |         |   |      |     |     |     | Lu3083R | TGAACCATCTTCAAGTGCTGAC    | 60.3                  | 45.5 | 22    |       |
| Lu3085  | 1 | p3 | (TGT)6  | 2 | 328  | 334 |     |     | Lu3085F | CAGTGGGAAAGGTCAGGAAC      | 59.5                  | 55   | 19+20 |       |
|         |   |    |         |   |      |     |     |     | Lu3085R | TCGGTACCCAAACAAAAGC       | 60                    | 45   | 20    |       |
| Lu3090  | 1 | p2 | (CT)10  | 2 | 188  | 190 |     |     | Lu3090F | GGTGGAGAAGAGGAGCTGTG      | 60                    | 60   | 19+20 |       |
|         |   |    |         |   |      |     |     |     | Lu3090R | CTAATCCCCGCTCTCAAAATC     | 60                    | 47.6 | 21    |       |
| Lu3091  | 1 | p2 | (TA)18  | 5 | 263  | 265 | 269 | 273 | 277     | Lu3091F                   | GATTGGAATGGGAGACTGG   | 59.3 | 50    | 19+20 |
|         |   |    |         |   |      |     |     |     | Lu3091R | GTAACACTAACAGCGCCAACC     | 59.7                  | 52.4 | 21    |       |
| Lu3092  | 1 | p3 | (ATA)12 | 3 | 214  | 220 | 223 |     | Lu3092F | ATGATACCACCAGCACAGCA      | 60.1                  | 50   | 19+20 |       |
|         |   |    |         |   |      |     |     |     | Lu3092R | CGAGGTTAAAATGGAATACACACC  | 60.8                  | 41.7 | 24    |       |
| Lu3094  | 1 | p2 | (GA)10  | 3 | 192  | 194 | 196 |     | Lu3094F | TGGTTGGGAGTGTTTTTGAAC     | 59.9                  | 42.9 | 19+21 |       |
|         |   |    |         |   |      |     |     |     | Lu3094R | CTTCCTCGAGATCCGAACAC      | 59.8                  | 55   | 20    |       |
| Lu3095  | 1 | p4 | (GTTA)6 | 2 | 339  | 343 |     |     | Lu3095F | CCCACTATTGGGTCGACAAC      | 60.2                  | 55   | 19+20 |       |
|         |   |    |         |   |      |     |     |     | Lu3095R | CAACACTTTATTTACCAACCCACAC | 60.8                  | 40   | 25    |       |
| Lu3097  | 1 | p3 | (AGA)11 | 4 | 280  | 295 | 298 | 301 | Lu3097F | AAGGAGGGGGAGAAAACAAC      | 59.4                  | 50   | 19+20 |       |
|         |   |    |         |   |      |     |     |     | Lu3097R | GGGTTGTTGGGAAGAAGAAAC     | 59.8                  | 47.6 | 21    |       |
| Lu3099  | 1 | p2 | (AT)9   | 2 | 247  | 249 |     |     | Lu3099F | AAGTTGCGCCATTAGTGTCC      | 60.1                  | 50   | 19+20 |       |
|         |   |    |         |   |      |     |     |     | Lu3099R | GAACCACCCGCTAAACTCAG      | 59.7                  | 55   | 20    |       |
| Lu3100a | 2 | p2 | (CT)9   | 2 | 313  | 317 |     |     | Lu3100F | CGTTTTCAATCGGTGTCTGG      | 60.1                  | 52.6 | 19+19 |       |
| Lu3100b |   |    |         | 2 | 304  | 306 |     |     | Lu3100R | CAGGCCATGTACGATGTTTG      | 60                    | 50   | 20    |       |
| Lu3103  | 1 | p3 | (TGA)6  | 2 | 343  | 346 |     |     | Lu3103F | CCATCAAACACCATTCAAACC     | 60.1                  | 42.9 | 19+21 |       |
|         |   |    |         |   |      |     |     |     | Lu3103R | CCCAACTCACTCACCTCCTC      | 59.7                  | 60   | 20    |       |
| Lu3109  | 1 | p3 | (AAG)11 | 2 | 285  | 288 |     |     | Lu3109F | AGCAAATCTGCAGGAAAAGC      | 59.6                  | 45   | 19+20 |       |
|         |   |    |         |   |      |     |     |     | Lu3109R | GCAAATTTTGAAGGCTCCTG      | 59.8                  | 45   | 20    |       |
| Lu3111  | 1 | p2 | (TA)9   | 5 | null | 290 | 292 | 294 | 296     | Lu3111F                   | TCCCATCTAGGTGGAAAGGAC | 60.3 | 52.4  | 19+21 |
|         |   |    |         |   |      |     |     |     | Lu3111R | TGTGGAAAGGGTATGGCTTC      | 59.9                  | 50   | 20    |       |
| Lu3113  | 1 | p2 | (AG)11  | 3 | 251  | 253 | 261 |     | Lu3113F | CTTGGTGACTGGCAATCTAGC     | 59.9                  | 52.4 | 19+21 |       |
|         |   |    |         |   |      |     |     |     | Lu3113R | GTCCCACCCTTCAATTCTTG      | 59.4                  | 50   | 20    |       |
| Lu3114  | 1 | p2 | (GA)11  | 2 | 268  | 270 |     |     | Lu3114F | GGATTCATGGACGAGAGGAG      | 59.6                  | 55   | 19+20 |       |
|         |   |    |         |   |      |     |     |     | Lu3114R | TCCCTCCCACTCATCAAAAC      | 59.9                  | 50   | 20    |       |

|         |   |    |           |   |      |     |                     |         |                            |      |      |       |
|---------|---|----|-----------|---|------|-----|---------------------|---------|----------------------------|------|------|-------|
| Lu3116  | 1 | p2 | (TA)9     | 3 | 342  | 344 | 348                 | Lu3116F | AGGTAACGTACCGCTTATATTTTACA | 58.7 | 34.6 | 19+26 |
|         |   |    |           |   |      |     |                     | Lu3116R | ATACGCGAGATGGACACGTA       | 59.2 | 50   | 20    |
| Lu3117  | 1 | p2 | (GA)13    | 2 | 206  | 208 |                     | Lu3117F | CCAAAAAGAAAGACGGTTGG       | 59.6 | 45   | 19+20 |
|         |   |    |           |   |      |     |                     | Lu3117R | TCCTAAAAACTTCCACCACTCC     | 59.5 | 45.5 | 22    |
| Lu3119  | 1 | p2 | (AT)19    | 5 | 315  | 317 | 323 325 329         | Lu3119F | ATCGTTTTGCATCGTGATTG       | 59.5 | 40   | 19+20 |
|         |   |    |           |   |      |     |                     | Lu3119R | GATCGAGCTATTGTATTGTTCCAG   | 60   | 41.7 | 24    |
| Lu3120  | 1 | p2 | (AT)17    | 3 | 277  | 279 | 283                 | Lu3120F | AAACAGGCAAACCAATGTCC       | 59.8 | 45   | 19+20 |
|         |   |    |           |   |      |     |                     | Lu3120R | ACTCGACCCACATCCAACCTC      | 60   | 55   | 20    |
| Lu3123  | 1 | p2 | (TA)13    | 4 | 355  | 357 | 359 363             | Lu3123F | CATTGAGTGTGTTAGTCGAACCAT   | 60.3 | 41.7 | 19+24 |
|         |   |    |           |   |      |     |                     | Lu3123R | GAGATATCCATTGATACGCTCCA    | 60.3 | 43.5 | 23    |
| Lu3125  | 1 | p3 | (AAG)11   | 2 | 313  | 316 |                     | Lu3125F | TTTTTACCAGGGGATTGCAG       | 59.9 | 45   | 19+20 |
|         |   |    |           |   |      |     |                     | Lu3125R | AAAGACGGTCGATGGTTCTG       | 60.1 | 50   | 20    |
| Lu3127  | 1 | p2 | (TA)15    | 3 | 227  | 241 | 245                 | Lu3127F | AACGCTGCCCTAGTGATTTG       | 60.3 | 50   | 19+20 |
|         |   |    |           |   |      |     |                     | Lu3127R | ATCTCCCCAAACGCATCTC        | 60   | 52.6 | 19    |
| Lu3130  | 1 | p3 | (ATT)8    | 2 | 267  | 270 |                     | Lu3130F | TTCACCGTGGTTTGTTGTAGA      | 59.1 | 42.9 | 19+21 |
|         |   |    |           |   |      |     |                     | Lu3130R | GTTTTGGGTTCGGATAGCAAG      | 59.6 | 50   | 20    |
| Lu3132  | 1 | p2 | (AT)13    | 4 | 198  | 200 | 202 230             | Lu3132F | AGATCTTATCCTCAAACGAACAGG   | 60   | 41.7 | 19+24 |
|         |   |    |           |   |      |     |                     | Lu3132R | TGTTGTTGCTCAAACCTTAGTACTGG | 59.8 | 40   | 25    |
| Lu3134  | 1 | p3 | (CAG)8    | 2 | 240  | 249 |                     | Lu3134F | ACAATCGACATGGGAAAAGC       | 59.9 | 45   | 19+20 |
|         |   |    |           |   |      |     |                     | Lu3134R | CAAGTAAAACAGCACCAACAGC     | 59.9 | 45.5 | 22    |
| Lu3143a | 2 | p2 | (GA)9     | 2 | null | 291 |                     | Lu3143F | CGAATCTTCTTCGCTTCACC       | 60   | 50   | 19+20 |
| Lu3143b |   |    |           | 2 | null | 284 |                     | Lu3143R | CGAGACCGAGACAGTCAAATC      | 59.9 | 52.4 | 21    |
| Lu3144  | 1 | p3 | (TAC)6    | 2 | 258  | 264 |                     | Lu3144F | TCACACCGCCCAATCATACT       | 60.3 | 52.6 | 19+19 |
|         |   |    |           |   |      |     |                     | Lu3144R | TGCACACGCTCTAACGAATC       | 60   | 50   | 20    |
| Lu3146  | 1 | p2 | (AT)12    | 2 | 321  | 325 |                     | Lu3146F | AACCCAGATGCCTACGTTTG       | 60   | 50   | 19+20 |
|         |   |    |           |   |      |     |                     | Lu3146R | CCGAACCCACTTTAACCTAGC      | 60   | 52.4 | 21    |
| Lu3148  | 1 | p6 | (CTGCGA)5 | 2 | 250  | 262 |                     | Lu3148F | ACGTGGTTCGACGTAATACCC      | 59.7 | 55   | 19+20 |
|         |   |    |           |   |      |     |                     | Lu3148R | AACCCGCTACTCACCGACT        | 59.7 | 57.9 | 19    |
| Lu3149  | 1 | p3 | (TCC)8    | 2 | 250  | 253 |                     | Lu3149F | TCCTCAATCTCTCCCTCACG       | 60.3 | 55   | 19+20 |
|         |   |    |           |   |      |     |                     | Lu3149R | TTGCAGACAGTCACACGTCA       | 60.1 | 50   | 20    |
| Lu3150  | 1 | p3 | (TCG)7    | 3 | 360  | 366 | 369                 | Lu3150F | CCGCAGCTGAATTATATTTGG      | 59.6 | 42.9 | 19+21 |
|         |   |    |           |   |      |     |                     | Lu3150R | TCGACGACCTACCCATTTTC       | 59.9 | 50   | 20    |
| Lu3151  | 1 | p3 | (AAT)6    | 2 | 325  | 328 |                     | Lu3151F | TTTCGAGTCGGTGTTCAATTC      | 60.1 | 42.9 | 19+21 |
|         |   |    |           |   |      |     |                     | Lu3151R | AAGTGTAGAATCCCCACCAC       | 60.1 | 52.4 | 21    |
| Lu3152  | 1 | p3 | (ATA)10   | 2 | 246  | 261 |                     | Lu3152F | TCCTCGCATTACAAGTCTTCC      | 59.3 | 47.6 | 19+21 |
|         |   |    |           |   |      |     |                     | Lu3152R | ACCGTGAATTGCTTGATCG        | 59.7 | 47.4 | 19    |
| Lu3153  | 1 | p4 | (ATAA)6   | 3 | 270  | 278 | 284                 | Lu3153F | TCCACGGGTGGATATTTCA        | 59.7 | 47.4 | 19+19 |
|         |   |    |           |   |      |     |                     | Lu3153R | GTACGGAAGGGGATGATGTG       | 60.2 | 55   | 20    |
| Lu3156  | 1 | p3 | (AGA)11   | 3 | 333  | 339 | 342                 | Lu3156F | TCGCCAGCCTTCTTCTTTAG       | 59.7 | 50   | 19+20 |
|         |   |    |           |   |      |     |                     | Lu3156R | AAACGCGGGTATTAACAACG       | 59.9 | 45   | 20    |
| Lu3157  | 1 | p2 | (AT)11    | 7 | 220  | 224 | 226 232 234 236 238 | Lu3157F | ACGCATCCTTAGTGCAATCC       | 60.1 | 50   | 19+20 |
|         |   |    |           |   |      |     |                     | Lu3157R | CGTAGCCCTTGTCTTCTTGC       | 60   | 55   | 20    |

|         |   |    |                                                                                                              |   |      |                     |  |         |                             |      |      |       |
|---------|---|----|--------------------------------------------------------------------------------------------------------------|---|------|---------------------|--|---------|-----------------------------|------|------|-------|
| Lu3160  | 1 | p2 | (AG)9                                                                                                        | 2 | null | 249                 |  | Lu3160F | GGCTTTGATTCCTGGATGG         | 60.4 | 52.6 | 19+19 |
|         |   |    |                                                                                                              |   |      |                     |  | Lu3160R | CTGAGTTGGTATAGCTTCTTTGAGG   | 59.9 | 44   | 25    |
| Lu3165  | 1 | c  | (AGA)6gggatgtcgatctcggttgcacatcgtc<br>aacagcaagatcttcatctggactttggaactttg<br>ctcgccgccgatctcctcaccggac(TCA)6 | 2 | null | 292                 |  | Lu3165F | ACTTAGCCACCGACAACGAC        | 60.2 | 55   | 19+20 |
|         |   |    |                                                                                                              |   |      |                     |  | Lu3165R | GGGGTTTAGGGTGATGGTG         | 60   | 57.9 | 19    |
| Lu3167  | 1 | p2 | (CT)16                                                                                                       | 4 | 345  | 347 351 353         |  | Lu3167F | ACGTGGCCAAGTAAACGAAA        | 60.5 | 45   | 19+20 |
|         |   |    |                                                                                                              |   |      |                     |  | Lu3167R | AACGGGATTTAACAGCAGGA        | 59.6 | 45   | 20    |
| Lu3169  | 1 | p6 | (TGGGCT)5                                                                                                    | 2 | 216  | 234                 |  | Lu3169F | CTGGCCCATCAACTCATTG         | 60.1 | 52.6 | 19+19 |
|         |   |    |                                                                                                              |   |      |                     |  | Lu3169R | GCCGACGAGGTAATGGTAA         | 60   | 50   | 20    |
| Lu3171  | 1 | p4 | (GGTT)10                                                                                                     | 2 | 224  | 228                 |  | Lu3171F | TTATGGGGCGCTTAAGTCTG        | 60.2 | 50   | 19+20 |
|         |   |    |                                                                                                              |   |      |                     |  | Lu3171R | TGCATGCTTTGATGCTTACC        | 59.8 | 45   | 20    |
| Lu3176  | 1 | p3 | (CTG)6                                                                                                       | 2 | 236  | 242                 |  | Lu3176F | CGTTTGTGCTAGTGGGGACT        | 60.2 | 55   | 19+20 |
|         |   |    |                                                                                                              |   |      |                     |  | Lu3176R | TTCTTCCTTCCTTCCCTTTTG       | 59.7 | 42.9 | 21    |
| Lu3178a | 2 | c  | (AAT)6tcacctcaatatatctcaaacaccac<br>gtacattag(TA)12                                                          | 2 | 237  | 239                 |  | Lu3178F | ACTCCACGAACACCACTTCC        | 60   | 55   | 19+20 |
| Lu3178b |   |    |                                                                                                              | 3 | 276  | 278 280             |  | Lu3178R | CAGGTA CTCA TTTCA TTTCCCTTG | 59.9 | 43.5 | 23    |
| Lu3180  | 1 | p2 | (CT)20                                                                                                       | 6 | 246  | 260 262 264 266 268 |  | Lu3180F | ACGGTCAAAGACGAAAGGTG        | 60.1 | 50   | 19+20 |
|         |   |    |                                                                                                              |   |      |                     |  | Lu3180R | GAAAGGACAAAGCTGCCATC        | 59.8 | 50   | 20    |
| Lu3181  | 1 | p4 | (ACTC)5                                                                                                      | 3 | 358  | 360 364             |  | Lu3181F | ATGGGTTAGTCACGGAGTCG        | 60   | 55   | 19+20 |
|         |   |    |                                                                                                              |   |      |                     |  | Lu3181R | TGCTGTGCATGGCATATTG         | 60.2 | 47.4 | 19    |
| Lu3182  | 1 | p4 | (CTAT)5                                                                                                      | 2 | 244  | 256                 |  | Lu3182F | GTTTCATTTTTCTGGGCATTTT      | 59.8 | 36.4 | 19+22 |
|         |   |    |                                                                                                              |   |      |                     |  | Lu3182R | CCCCTCCATCTCTATCTCTATATATCC | 60   | 44.4 | 27    |
| Lu3184  | 1 | p3 | (TGA)6                                                                                                       | 3 | 356  | 362 368             |  | Lu3184F | CTGCTGAAGCTGCCTTAGGT        | 59.8 | 55   | 19+20 |
|         |   |    |                                                                                                              |   |      |                     |  | Lu3184R | AAACCTTGACCTCCCATTCC        | 60.2 | 50   | 20    |
| Lu3185  | 1 | p3 | (ATT)7                                                                                                       | 2 | 370  | 373                 |  | Lu3185F | GCCTGTCTGATAAGGACAAGAAA     | 59.8 | 43.5 | 19+23 |
|         |   |    |                                                                                                              |   |      |                     |  | Lu3185R | CCGAACAGGAAATCATTTAACG      | 60.7 | 40.9 | 22    |
| Lu3186  | 1 | p2 | (TA)13                                                                                                       | 4 | 335  | 337 339 341         |  | Lu3186F | GACTGTTGTCCAACGAGGTG        | 59.2 | 55   | 19+20 |
|         |   |    |                                                                                                              |   |      |                     |  | Lu3186R | GAACCTGACCGTTGCCAAGTT       | 60.2 | 50   | 20    |
| Lu3187  | 1 | p3 | (GTT)8                                                                                                       | 2 | 223  | 226                 |  | Lu3187F | CCTTGAGCTAGATGCCAAGC        | 60.1 | 55   | 19+20 |
|         |   |    |                                                                                                              |   |      |                     |  | Lu3187R | CAAAAGAGAGGGCAGCTGAG        | 60.3 | 55   | 20    |
| Lu3188  | 1 | p2 | (AT)12                                                                                                       | 2 | 250  | 254                 |  | Lu3188F | CTAAATCGTAAAAATTAACGACAC    | 55.7 | 28   | 19+25 |
|         |   |    |                                                                                                              |   |      |                     |  | Lu3188R | ACGTAAACATACCAGTGATGC       | 55.2 | 42.9 | 21    |
| Lu3189  | 1 | p3 | (ATA)6                                                                                                       | 3 | 239  | 245 248             |  | Lu3189F | TCCAACCTCGGCTTTGATACC       | 60.1 | 50   | 19+20 |
|         |   |    |                                                                                                              |   |      |                     |  | Lu3189R | GTTAGATACGGACAGCTTGACAG     | 59.1 | 50   | 22    |
| Lu3192  | 1 | p3 | (TCA)6                                                                                                       | 2 | 220  | 223                 |  | Lu3192F | TACCAGCATTGGATCGAACA        | 60.1 | 45   | 19+20 |
|         |   |    |                                                                                                              |   |      |                     |  | Lu3192R | AACGGGAACTCAAGTTGGTG        | 60   | 50   | 20    |
| Lu3193  | 1 | p3 | (TCC)6                                                                                                       | 2 | 334  | 340                 |  | Lu3193F | GAATCGACATCGCTCTCCTC        | 59.9 | 55   | 19+20 |
|         |   |    |                                                                                                              |   |      |                     |  | Lu3193R | TAGTGGTGCTGCTTCAAACG        | 60   | 50   | 20    |
| Lu3195  | 1 | p4 | (AATA)5                                                                                                      | 3 | 263  | 266 270             |  | Lu3195F | TGGGGTTTAAGGCTTCACTG        | 60.1 | 50   | 19+20 |
|         |   |    |                                                                                                              |   |      |                     |  | Lu3195R | GCCCACCCATCAAGTTAC          | 60.2 | 57.9 | 19    |

|         |   |    |         |   |     |     |     |         |                         |                      |                         |       |       |       |
|---------|---|----|---------|---|-----|-----|-----|---------|-------------------------|----------------------|-------------------------|-------|-------|-------|
| Lu3199a | 2 | p3 | (TCT)7  | 3 | 223 | 229 | 232 | Lu3199F | TCCTCCTCTTCCACTCTTCTTTC | 60.4                 | 47.8                    | 19+23 |       |       |
| Lu3199b |   |    |         | 3 | 329 | 335 | 338 | Lu3199R | TGAAGCAATGGAGGAAAACC    | 60.1                 | 45                      | 20    |       |       |
| Lu3200  | 1 | p3 | (TTC)9  | 2 | 240 | 243 |     | Lu3200F | TGTAGCACAGCCGACTCTTG    | 60.2                 | 55                      | 19+20 |       |       |
|         |   |    |         |   |     |     |     | Lu3200R | CTCTGGATGGGAAGCCATT     | 60                   | 52.6                    | 19    |       |       |
| Lu3201  | 1 | p3 | (AAT)9  | 3 | 214 | 235 | 238 | Lu3201F | CCCTTTTAATGCATGCTTGG    | 60.4                 | 45                      | 19+20 |       |       |
|         |   |    |         |   |     |     |     | Lu3201R | CACCTCATGTGCTTAACCA     | 59.7                 | 50                      | 20    |       |       |
| Lu3202  | 1 | p3 | (ATT)9  | 2 | 237 | 240 |     | Lu3202F | TGGCTGAAAGCATTCAAGTG    | 60                   | 45                      | 19+20 |       |       |
|         |   |    |         |   |     |     |     | Lu3202R | TCTCGTTACTCCCCACCAAC    | 60                   | 55                      | 20    |       |       |
| Lu3204  | 1 | p3 | (TTC)9  | 2 | 362 | 365 |     | Lu3204F | ACCCACAACCTTTTTCTCC     | 60.2                 | 50                      | 19+20 |       |       |
|         |   |    |         |   |     |     |     | Lu3204R | GTTGTTTGTGGGGACAATCC    | 60.1                 | 50                      | 20    |       |       |
| Lu3205  | 1 | p2 | (TA)11  | 3 | 352 | 354 | 356 | Lu3205F | GCATTGCTTTTCATCCATGTG   | 60.1                 | 45                      | 19+20 |       |       |
|         |   |    |         |   |     |     |     | Lu3205R | TGTCCAAATGAAGTCCATGC    | 59.5                 | 45                      | 20    |       |       |
| Lu3206  | 1 | p2 | (AG)14  | 2 | 274 | 282 |     | Lu3206F | ATCCCGTGGTCTTGACAGC     | 60.1                 | 55                      | 19+20 |       |       |
|         |   |    |         |   |     |     |     | Lu3206R | TGCGTGCGGCGTTT          | 60.7                 | 64.3                    | 14    |       |       |
| Lu3207  | 1 | p2 | (TC)15  | 2 | 234 | 236 |     | Lu3207F | ATCCAAATCACGAACACAAGG   | 59.8                 | 42.9                    | 19+21 |       |       |
|         |   |    |         |   |     |     |     | Lu3207R | TCGTGCCACTTTTATCACTGG   | 59.7                 | 50                      | 20    |       |       |
| Lu3209  | 1 | p2 | (TA)9   | 4 | 206 | 214 | 224 | 226     | Lu3209F                 | CATCCAAGCCAATGGTCTCT | 60.1                    | 50    | 19+20 |       |
|         |   |    |         |   |     |     |     | Lu3209R | ATAGGGCTGGAGCAGTGAGA    | 60                   | 55                      | 20    |       |       |
| Lu3210  | 1 | p2 | (TA)10  | 3 | 236 | 238 | 242 | Lu3210F | TTTTGATCATTTCCTTCCCAAGC | 59.9                 | 40                      | 19+20 |       |       |
|         |   |    |         |   |     |     |     | Lu3210R | GCCAGTTGCTTTCTTTGGTC    | 59.9                 | 50                      | 20    |       |       |
| Lu3211  | 1 | p3 | (TAT)8  | 2 | 315 | 321 |     | Lu3211F | AATAGAAGCAGACAGGCTGAGG  | 60                   | 50                      | 19+22 |       |       |
|         |   |    |         |   |     |     |     | Lu3211R | AACAACCTGAATCACCCATTTCG | 59.8                 | 42.9                    | 21    |       |       |
| Lu3212  | 1 | p2 | (AT)20  | 5 | 231 | 239 | 249 | 251     | 255                     | Lu3212F              | GGTTTAATTTGCAGTCCAGTACG | 59.9  | 43.5  | 19+23 |
|         |   |    |         |   |     |     |     | Lu3212R | GAAAAAGCCAGGAGTCATGC    | 59.8                 | 50                      | 20    |       |       |
| Lu3213  | 1 | p2 | (AT)10  | 2 | 313 | 315 |     | Lu3213F | TTCTCCTGAAATCATGCTTCG   | 60.3                 | 42.9                    | 19+21 |       |       |
|         |   |    |         |   |     |     |     | Lu3213R | AGTCCAGAGGCGATTCAAAG    | 59.4                 | 50                      | 20    |       |       |
| Lu3216  | 1 | p2 | (TA)10  | 5 | 265 | 273 | 275 | 277     | 279                     | Lu3216F              | GAGGTGGAGAAATTTGGTTGA   | 59    | 42.9  | 19+21 |
|         |   |    |         |   |     |     |     | Lu3216R | CGTAGGTTATCGCTTGAGAGC   | 59.1                 | 52.4                    | 21    |       |       |
| Lu3217  | 1 | p4 | (AAAG)7 | 2 | 294 | 298 |     | Lu3217F | AAAAGGGAGAGTTCCCCAAG    | 59.5                 | 50                      | 19+20 |       |       |
|         |   |    |         |   |     |     |     | Lu3217R | AGCAGCCAGCAATCTGTACC    | 60.4                 | 55                      | 50    |       |       |
| Lu3218  | 1 | p3 | (CAG)8  | 3 | 212 | 218 | 224 | Lu3218F | ATGATGGGGATTCTTACCG     | 59.6                 | 52.6                    | 19+19 |       |       |
|         |   |    |         |   |     |     |     | Lu3218R | GTTCCACTTACCGCTTCACC    | 59.6                 | 55                      | 20    |       |       |
| Lu3219a | 2 | p3 | (TCT)6  | 2 | 362 | 374 |     | Lu3219F | CCAGTTTTTCTCCAGCAACC    | 59.7                 | 55                      | 19+20 |       |       |
| Lu3219b |   |    |         | 2 | 312 | 315 |     | Lu3219R | TCACCAGCTCTTCACTACAAGG  | 59.5                 | 50                      | 22    |       |       |
| Lu3220  | 1 | p2 | (TC)15  | 3 | 332 | 334 | 336 | Lu3220F | GTGACGATTGGAATGACGTG    | 60                   | 50                      | 19+20 |       |       |
|         |   |    |         |   |     |     |     | Lu3220R | TCACTTACCGGCGATAGAGC    | 60.4                 | 55                      | 20    |       |       |
| Lu3222  | 1 | p2 | (TC)14  | 2 | 274 | 278 |     | Lu3222F | ACCCAGACGGAAAGACTGC     | 60.3                 | 57.9                    | 19+19 |       |       |
|         |   |    |         |   |     |     |     | Lu3222R | ACCACCAATCCTCGTACACC    | 59.7                 | 55                      | 20    |       |       |
| Lu3223  | 1 | p2 | (AG)13  | 3 | 359 | 361 | 363 | Lu3223F | GTTCTCCTTCGCCTTCTTCC    | 60.3                 | 55                      | 19+20 |       |       |
|         |   |    |         |   |     |     |     | Lu3223R | CAGCCAAATCTCCTCTCACC    | 59.8                 | 55                      | 20    |       |       |
| Lu3225  | 1 | p4 | (ATGG)8 | 2 | 215 | 223 |     | Lu3225F | CAGTTCCCCAAAATCACGTC    | 60.4                 | 50                      | 19+20 |       |       |
|         |   |    |         |   |     |     |     | Lu3225R | TTGCAGCTAGCGTACAGTGC    | 60.4                 | 55                      | 20    |       |       |

|        |   |    |                                                      |   |     |     |     |     |     |         |                        |      |      |       |
|--------|---|----|------------------------------------------------------|---|-----|-----|-----|-----|-----|---------|------------------------|------|------|-------|
| Lu3226 | 1 | c  | (ATTA)5ctaatatcagcacttggttcgtctatgac<br>accgac(AG)13 | 2 | 280 | 282 |     |     |     | Lu3226F | CGACGCGAATGTGTTTCATAC  | 60.1 | 50   | 19+20 |
|        |   |    |                                                      |   |     |     |     |     |     | Lu3226R | CAGCACCGACAGTAAGGAGAG  | 60.1 | 57.1 | 21    |
| Lu3228 | 1 | p3 | (AGA)17                                              | 5 | 183 | 189 | 195 | 198 | 201 | Lu3228F | GGCTGATGACATGGTGATTG   | 59.9 | 50   | 19+20 |
|        |   |    |                                                      |   |     |     |     |     |     | Lu3228R | CTTTGGATTCATCGCCTCTC   | 59.8 | 50   | 20    |
| Lu3229 | 1 | p2 | (AT)12                                               | 3 | 332 | 336 | 338 |     |     | Lu3229F | AATATCCAAGCAGCCTTTGC   | 59.3 | 45   | 19+20 |
|        |   |    |                                                      |   |     |     |     |     |     | Lu3229R | GTGGTCTCGGAGCAAGACTC   | 60   | 60   | 20    |
| Lu3231 | 1 | p3 | (ACC)6                                               | 2 | 296 | 299 |     |     |     | Lu3231F | TGCCATGAAGCAGAGGAAG    | 60.1 | 52.6 | 19+19 |
|        |   |    |                                                      |   |     |     |     |     |     | Lu3231R | AGGTCGAACTTGACATGG     | 59.7 | 52.6 | 19    |
| Lu3232 | 1 | p3 | (AGG)6                                               | 2 | 265 | 268 |     |     |     | Lu3232F | AACAGGGATGGTGATTGCTC   | 59.9 | 50   | 19+20 |
|        |   |    |                                                      |   |     |     |     |     |     | Lu3232R | TAACCTGGAGGAGGATGGTG   | 59.9 | 55   | 20    |
| Lu3234 | 1 | p5 | (CTTCT)5                                             | 2 | 250 | 325 |     |     |     | Lu3234F | CGCCATCTTCCATGTTTTCT   | 60.1 | 45   | 19+20 |
|        |   |    |                                                      |   |     |     |     |     |     | Lu3234R | GACAAGAACATGGGCCACTT   | 60   | 50   | 20    |
| Lu3235 | 1 | p2 | (GA)11                                               | 2 | 215 | 219 |     |     |     | Lu3235F | CAACATCAACGCAGAAGAAGAG | 60.1 | 45.5 | 19+22 |
|        |   |    |                                                      |   |     |     |     |     |     | Lu3235R | AATTGGCGAGAAACCCAAC    | 59.9 | 47.4 | 19    |
| Lu3236 | 1 | p2 | (TA)9                                                | 2 | 218 | 220 |     |     |     | Lu3236F | CCGTTCAATGCCGAATTTAC   | 60.3 | 45   | 19+20 |
|        |   |    |                                                      |   |     |     |     |     |     | Lu3236R | GCCAAACGGATTGGAAAAC    | 60.3 | 47.4 | 19    |
| Lu3237 | 1 | p3 | (CAG)9                                               | 2 | 234 | 237 |     |     |     | Lu3237F | GGAGAAGAGGGGAATTGAGC   | 60.2 | 55   | 19+20 |
|        |   |    |                                                      |   |     |     |     |     |     | Lu3237R | TTGCAGCCTTTCTTTGGTTC   | 60.4 | 45   | 20    |
| Lu3238 | 1 | p3 | (GAA)7                                               | 3 | 308 | 311 | 317 |     |     | Lu3238F | AATGGAGGTGAGTGTGAGTGG  | 60   | 52.4 | 19+21 |
|        |   |    |                                                      |   |     |     |     |     |     | Lu3238R | GAAGGGGAATTCTGGTACAGC  | 60   | 52.4 | 21    |
| Lu3239 | 1 | p2 | (CT)9                                                | 2 | 363 | 365 |     |     |     | Lu3239F | GACTGAATTGGAGCTTTGTGG  | 59.7 | 47.6 | 19+21 |
|        |   |    |                                                      |   |     |     |     |     |     | Lu3239R | GTCCGACCATGCAGAATAGG   | 60.5 | 55   | 20    |
| Lu3240 | 1 | p2 | (TA)11                                               | 3 | 294 | 304 | 306 |     |     | Lu3240F | ATGAACCGAGGATGACGAAG   | 60.1 | 50   | 19+20 |
|        |   |    |                                                      |   |     |     |     |     |     | Lu3240R | TTTGTAGCATTCCACACACCTC | 60   | 45.5 | 22    |
| Lu3244 | 1 | p2 | (TA)11                                               | 3 | 260 | 300 | 304 |     |     | Lu3244F | ATCAAGCAAACCCCGACTC    | 60.1 | 52.6 | 19+19 |
|        | 1 | p2 | (AG)16                                               | 3 | 194 | 196 | 198 |     |     | Lu3244R | TGCTGAAGGATATTGGTGTCTG | 60.1 | 45.5 | 22    |
| Lu3248 | 1 | p3 | (GGA)10                                              | 2 | 209 | 212 |     |     |     | Lu3248F | GCCAACGAGATCAGCTAAGG   | 60   | 55   | 19+20 |
|        |   |    |                                                      |   |     |     |     |     |     | Lu3248R | CTTCCGATCATGGAGAAAGC   | 59.8 | 50   | 20    |
| Lu3250 | 1 | p6 | (TGGGCC)5                                            | 3 | 162 | 174 | 180 |     |     | Lu3250F | CTTAATAGGCTGGTGGTGCAG  | 59.8 | 52.4 | 19+21 |
|        |   |    |                                                      |   |     |     |     |     |     | Lu3250R | AAACAAGCCTCCAAAACACG   | 60.1 | 45   | 20    |
| Lu3251 | 1 | p3 | (TCA)6                                               | 2 | 297 | 300 |     |     |     | Lu3251F | TGCAGCAAAGTTAGCAGGTG   | 60.2 | 50   | 19+20 |
|        |   |    |                                                      |   |     |     |     |     |     | Lu3251R | CTGATCACGCTTTTGGAGTG   | 59.4 | 50   | 20    |
| Lu3252 | 1 | c  | (AT)18aactcttatctccttc(TCT)6                         | 4 | 202 | 204 | 210 | 212 |     | Lu3252F | AAGACGTCCCCTTTGGTATG   | 58.9 | 50   | 19+20 |
|        |   |    |                                                      |   |     |     |     |     |     | Lu3252R | GGAATCGCTGAAGATGGAAC   | 59.6 | 50   | 20    |
| Lu3256 | 1 | p3 | (AAT)7                                               | 2 | 273 | 276 |     |     |     | Lu3256F | TCCAACCAGGCTCTGATACC   | 60.1 | 55   | 19+20 |
|        |   |    |                                                      |   |     |     |     |     |     | Lu3256R | GGAACAGGAAGGAAGGAACC   | 59.9 | 55   | 20    |
| Lu3262 | 1 | p3 | (AAT)12                                              | 2 | 195 | 198 |     |     |     | Lu3262F | GTCGACATTAGTAGGTGTTCTG | 57.8 | 47.8 | 19+23 |
|        |   |    |                                                      |   |     |     |     |     |     | Lu3262R | TTCCCTGCTATTGGATAAGAG  | 57.6 | 40.9 | 22    |
| Lu3266 | 1 | p3 | (GTT)10                                              | 4 | 199 | 205 | 211 | 214 |     | Lu3266F | TACTTGTATGTAGCTTCGAG   | 50.2 | 38.1 | 19+21 |
|        |   |    |                                                      |   |     |     |     |     |     | Lu3266R | GCTTAATCTCTGACTTCCTC   | 50.8 | 45   | 20    |
| Lu3267 | 1 | p2 | (TA)11                                               | 5 | 347 | 349 | 351 | 355 | 357 | Lu3267F | CTCTTTGGGATGATGACTTGC  | 59.7 | 47.6 | 19+21 |



|         |     |    |                                                                  |      |                             |         |                          |      |      |       |
|---------|-----|----|------------------------------------------------------------------|------|-----------------------------|---------|--------------------------|------|------|-------|
| Lu3269  | 1   | c  | (AT)15(AG)18                                                     | 3    | 264 266 277                 | Lu3267R | ATCTGTCTGGCTACGACAAGG    | 60.3 | 55   | 20    |
|         |     |    |                                                                  |      |                             | Lu3269F | CACAATTGCAGATCCTGTGG     | 60.1 | 50   | 19+20 |
|         |     |    |                                                                  |      |                             | Lu3269R | CTTTCTTCTGTGGTCCTCACG    | 59.9 | 52.4 | 21    |
| Lu3270  | 1   | c  | (ATC)6gggtgtttcatttcatcatcatttgcagagct<br>ggttcaagagctcctt(CTG)6 | 2    | 296 300                     | Lu3270F | ACGCGCTGTGTATTATCCATC    | 60   | 47.6 | 19+21 |
|         |     |    |                                                                  |      |                             | Lu3270R | ATTGCGACAATCTCCCAGTC     | 60.1 | 50   | 20    |
| Lu3271  | 1   | p2 | (AT)12                                                           | 2    | 362 368                     | Lu3271F | GGAAAAAGGTCTCCAATGAGG    | 59.9 | 47.6 | 19+21 |
|         |     |    |                                                                  |      |                             | Lu3271R | GGAGGAAGATTTGGTCCTTTG    | 59.9 | 47.6 | 21    |
| Lu3276  | 1   | p4 | (AAAG)10                                                         | 2    | 344 348                     | Lu3276F | TTGGGGCAGAACTTAAGTGG     | 60.1 | 50   | 19+20 |
|         |     |    |                                                                  |      |                             | Lu3276R | CGACTAATTCCCAGCCTAGC     | 59.8 | 57.9 | 19    |
| Lu3278  | 1   | p3 | (AGA)7                                                           | 2    | 215 224                     | Lu3278F | CGTCCGAGTCCTTGAAGAAG     | 60   | 55   | 19+20 |
|         |     |    |                                                                  |      |                             | Lu3278R | CTCCCTCAACAACCATAACCG    | 60.4 | 55   | 20    |
| Lu3279  | 1   | p2 | (AG)9                                                            | 2    | 240 244                     | Lu3279F | AGGAAGCAGCTTTGACTTGC     | 59.8 | 50   | 19+20 |
|         |     |    |                                                                  |      |                             | Lu3279R | CACATGCCATACTCCACACC     | 59.8 | 55   | 20    |
| Lu3280  | 1   | c* | (AT)17(ATGT)9*                                                   | 7    | 329 358 360 375 415 424 454 | Lu3280F | CCACCTCCAACCTTCTTCTCG    | 59.8 | 55   | 19+20 |
|         |     |    |                                                                  |      |                             | Lu3280R | CGCCGTACGAATTACTCTTTTTC  | 60.1 | 45.5 | 22    |
| Lu3281  | 1   | p2 | (CT)16                                                           | 3    | 234 236 238                 | Lu3281F | CACCATTGACATCGATCTGG     | 59.9 | 50   | 19+20 |
|         |     |    |                                                                  |      |                             | Lu3281R | TTTCGCCTTTATCCTGTTGG     | 60.1 | 45   | 20    |
| Lu3283  | 1   | p3 | (TAA)8                                                           | 3    | 336 339 348                 | Lu3283F | AGGCTAAATGCACTCAATAATCTG | 58.9 | 37.5 | 19+24 |
|         |     |    |                                                                  |      |                             | Lu3283R | GTACGCACGCTTGTACTTGG     | 59.4 | 55   | 20    |
| Lu3287  | 1   | p4 | (CAAC)5                                                          | 3    | 310 312 314                 | Lu3287F | ATCCACAGCATCGCTTAC       | 59.8 | 52.6 | 19+19 |
|         |     |    |                                                                  |      |                             | Lu3287R | TTTCCAGGTCAGGCTTATGG     | 60.1 | 50   | 20    |
| Lu3288  | 1   | p4 | (GAAG)5                                                          | 2    | 305 309                     | Lu3288F | AAGGAAGTGGGTTGTGGTTG     | 59.9 | 50   | 19+20 |
|         |     |    |                                                                  |      |                             | Lu3288R | CACCACTGTGTCCCTGTGTC     | 60   | 60   | 20    |
| Lu3289  | 1   | p2 | (AG)15                                                           | 3    | 213 221 225                 | Lu3289F | GATTCCGACGTGATGATCG      | 60   | 52.6 | 19+19 |
|         |     |    |                                                                  |      |                             | Lu3289R | TCCATCCATCCATCCTCTTC     | 59.8 | 50   | 20    |
| Lu3290  | 1   | p3 | (CTT)7                                                           | 2    | 263 269                     | Lu3290F | CCAGACCCAAGAAGACAACC     | 59.5 | 55   | 19+20 |
|         |     |    |                                                                  |      |                             | Lu3290R | CGTGAAGAAGACAGAAGAGACG   | 60   | 52.4 | 21    |
| Lu3291  | 1   | p3 | (AAT)13                                                          | 2    | 339 342                     | Lu3291F | AAGTAAGCACGGGGAGAGG      | 59.3 | 57.9 | 19+19 |
|         |     |    |                                                                  |      |                             | Lu3291R | CGCAGCTAAAACCTCGTAGGG    | 60   | 55   | 20    |
| Total   | 720 |    |                                                                  | 1966 |                             |         |                          |      |      |       |
| Average |     |    |                                                                  | 2.73 |                             |         |                          |      |      |       |

## EST-SSRs

| Marker | No loci | SSR type | SSR sequence                                                                                                                                                                     | No alleles |                 | Observed allele size | Primer           | Sequence (5' -> 3')                                | Tm (°C)      | GC content   |             |
|--------|---------|----------|----------------------------------------------------------------------------------------------------------------------------------------------------------------------------------|------------|-----------------|----------------------|------------------|----------------------------------------------------|--------------|--------------|-------------|
|        |         |          |                                                                                                                                                                                  |            |                 |                      |                  |                                                    |              | (%)          | Length (bp) |
| Lu853  | 1       | p2c      | (A)12gag(GA)10                                                                                                                                                                   | 2          | 136 140         |                      | lu853F<br>lu853R | GAAGGAAATTAAGAAGTGAGAGAAG<br>GCTCGCAATCTTCCCGTCT   | 58.7<br>62.8 | 33.3<br>57.9 | 19+27<br>19 |
| Lu857  | 1       | p2c      | (GA)7gggtagttt(GA)7gggagagagagaa<br>aaagataaaaagagagagaaagacggagag<br>acacagagagaaaaggcgaattttgt(AG)11<br>tagcaggggcccagggcagcgggtggaagtgg<br>ggtgtttgctgtttggtttgtttcttcta(T)10 | 3          | 354 362 376     |                      | lu857F<br>lu857R | GAGAAGGTGGGAGAGGGTTA<br>CGTCGGTGAGTTAGGGTTTG       | 58.2<br>60.5 | 55.0<br>55.0 | 19+20<br>20 |
| Lu859  | 1       | p3/6c    | (ATT)14gtatatgaatat(AATATG)5                                                                                                                                                     | 4          | 197 200 206 209 |                      | lu859F<br>lu859R | GATTCTCCGCAGCTCTGTTC<br>TACAGCAAACAGCTCCATCC       | 60.1<br>58.9 | 55.0<br>50.0 | 19+20<br>20 |
| Lu861  | 1       | p3c      | (ACG)6cagattaataacaacacacaaaccaa<br>attggatttcatgatttttccaatttctttaagggt<br>ttcc(TCT)5                                                                                           | 2          | 372 378         |                      | lu861F<br>lu861R | CCAGAGGTGGTGGGAAGAAGA<br>GGTGGAGAGGAGATGGTGAA      | 60.2<br>60.0 | 55.0<br>55.0 | 19+20<br>20 |
| Lu866  | 1       | p3c      | (CTC)6catctttatcccttctctgaaacacttgt(<br>TTC)5                                                                                                                                    | 2          | 342 345         |                      | lu866F<br>lu866R | CGTCCGAGTTCAGTCAGGAT<br>AAGAAGAAGCCGCAGAAATG       | 60.3<br>59.6 | 55.0<br>45.0 | 19+20<br>20 |
| Lu867  | 1       | p3c      | (CTC)7cagcgccgcttaactcctccgccac<br>cc(CCT)5tccgccaccgatgatgtcgaacatgt<br>ctg(ATT)7gatgtaac(ATT)5(GTT)6                                                                           | 2          | 381 393         |                      | lu867F<br>lu867R | GACGCTAGCTTTGTCCCTTG<br>ATTCTGGTCCACGTGCAAAC       | 60.0<br>60.0 | 55.0<br>50.0 | 19+20<br>20 |
| Lu868  | 1       | p3c      | (CTT)5ctctcaaatgtgccatc(GCT)5gttat<br>tatcattg(TTA)9                                                                                                                             | 2          | 277 280         |                      | lu868F<br>lu868R | TTGTGCCCCGATGATGATAGA<br>ATGTGCCCTCAGATCAGTCC      | 60.0<br>60.1 | 45.0<br>55.0 | 19+20<br>20 |
| Lu869  | 1       | p3c      | (CTT)5ttccaatcctctacca(TTC)7                                                                                                                                                     | 2          | 195 201         |                      | lu869F<br>lu869R | TGATCAAAAAGTTCCTTTATCTTTCA<br>GGTTGTACTGGGGTTGATGG | 59.7<br>60.1 | 30.8<br>55.0 | 19+26<br>20 |
| Lu870  | 1       | p3c      | (GAA)6(AAG)7                                                                                                                                                                     | 2          | 241 244         |                      | lu870F<br>lu870R | TGAAACGAAGAACTGGTCCAA<br>ACGTCTTCGAAAGTGCCTGT      | 60.7<br>59.9 | 42.9<br>50.0 | 19+21<br>20 |
| Lu871  | 1       | p3c      | (GAA)6gac(GAA)12                                                                                                                                                                 | 2          | 391 394         |                      | lu871F<br>lu871R | AAGAGTATTGCGGGAGAGCA<br>AAGAACTCGGTGGTGTATGG       | 60.0<br>60.0 | 50.0<br>50.0 | 19+20<br>20 |
| Lu872  | 1       | p3c      | (GGA)5cggcggagggaatgattatctcggaag<br>cgcagaagggtctgcttgagagctggataagttg<br>agatccgaggagatgg(AGA)7                                                                                | 2          | 385 388         |                      | lu872F<br>lu872R | AGGAAGCGAGGAGAAGAAGG<br>GATTCCGATGAACTCGAGGA       | 60.1<br>60.2 | 55.0<br>50.0 | 19+20<br>20 |

|       |   |     |                                                                      |   |      |     |                 |        |                            |      |      |       |
|-------|---|-----|----------------------------------------------------------------------|---|------|-----|-----------------|--------|----------------------------|------|------|-------|
| Lu873 | 1 | p3c | (T)18aatttactactactactattattattaatt<br>caaccacaacgcataattattag(TAT)6 | 2 | null | 299 |                 | lu873F | GTTTTCCCAGTCACGACGTT       | 60.0 | 50.0 | 19+20 |
|       |   |     |                                                                      |   |      |     |                 | lu873R | AGCTTGTGATGCTGATGGTG       | 59.9 | 50.0 | 20    |
| Lu885 | 1 | p2  | (CA)9                                                                | 2 | 480  | 490 |                 | lu885F | TTTTGCAACACCACCAATGT       | 59.9 | 40.0 | 19+20 |
|       |   |     |                                                                      |   |      |     |                 | lu885R | GCAGCATCAATGAAGAAGCA       | 60.1 | 45.0 | 20    |
| Lu886 | 1 | p2  | (AT)9                                                                | 6 | 195  | 197 | 203 211 223 231 | lu886F | CTCCAAACACTCTCGTTTATTTATTT | 58.4 | 30.8 | 19+26 |
|       |   |     |                                                                      |   |      |     |                 | lu886R | GTGAATGCTCTTGGCCTTGT       | 60.3 | 50.0 | 20    |
| Lu887 | 1 | p2  | (AT)9                                                                | 2 | 196  | 204 |                 | lu887F | TTTTAGACAATCGCAATA         | 47.4 | 27.8 | 19+18 |
|       |   |     |                                                                      |   |      |     |                 | lu887R | GGGTTTCATCCATTAGGTCCA      | 59.6 | 50.0 | 20    |
| Lu891 | 1 | p2  | (TA)9                                                                | 3 | 216  | 216 | 220             | lu891F | ACAACAAGCGTCAAGTGCAG       | 60.1 | 50.0 | 19+20 |
|       |   |     |                                                                      |   |      |     |                 | lu891R | AAATTAAGGGCTGGCAACA        | 59.6 | 40.0 | 20    |
| Lu893 | 1 | p2  | (TA)9                                                                | 2 | 218  | 222 |                 | lu893F | GAGGGGGAAGAGAAAAGAACA      | 59.7 | 47.6 | 19+21 |
|       |   |     |                                                                      |   |      |     |                 | lu893R | TGAACTTCGCTCCCATTTTT       | 59.7 | 40.0 | 20    |
| Lu895 | 1 | p2  | (CT)9                                                                | 3 | 317  | 319 | 333             | lu895F | CGTCCGAGAGAGTAAAACCT       | 59.5 | 55.0 | 19+20 |
|       |   |     |                                                                      |   |      |     |                 | lu895R | CCGTTTGGATTGAGTTCTG        | 60.5 | 50.0 | 20    |
| Lu896 | 1 | p2  | (AT)9                                                                | 2 | 272  | 278 |                 | lu896F | GTTTGCTTGCTGGACTCCTC       | 60.0 | 55.0 | 19+20 |
|       |   |     |                                                                      |   |      |     |                 | lu896R | TCCTAATCCCTCGGAACAAA       | 59.5 | 45.0 | 20    |
| Lu897 | 1 | p2  | (TA)9                                                                | 2 | 341  | 343 |                 | lu897F | CTAACGACCGGTTTCATGGAT      | 59.8 | 50.0 | 19+20 |
|       |   |     |                                                                      |   |      |     |                 | lu897R | AATTTACATACAAGCTACACAAAAA  | 54.5 | 24.0 | 25    |
| Lu899 | 1 | p2  | (AT)9                                                                | 3 | 209  | 211 | 213             | lu899F | CTGCATGCATGTCCAGTACG       | 61.3 | 55.0 | 19+20 |
|       |   |     |                                                                      |   |      |     |                 | lu899R | CAGGCTTGGAGGATTATTGG       | 59.5 | 50.0 | 20    |
| Lu900 | 1 | p2  | (AT)9                                                                | 2 | 344  | 354 |                 | lu900F | CTTTCTTCAACATAACCGCAAC     | 58.8 | 40.9 | 19+22 |
|       |   |     |                                                                      |   |      |     |                 | lu900R | AGCTTGCAAAAGTTGGCTTC       | 59.6 | 45.0 | 20    |
| Lu902 | 1 | p2  | (CT)10                                                               | 3 | null | 206 | 216             | lu902F | AAGAAACCATCGACGGTGAG       | 60.1 | 50.0 | 19+20 |
|       |   |     |                                                                      |   |      |     |                 | lu902R | GGATACAAAGGCAGATTCTT       | 53.5 | 40.0 | 20    |
| Lu903 | 1 | p2  | (AT)10                                                               | 2 | 214  | 216 |                 | lu903F | AGTTTCCCAAGTTCCCAAG        | 60.3 | 50.0 | 19+20 |
|       |   |     |                                                                      |   |      |     |                 | lu903R | CGATTAGATGGAAGGGAGGAG      | 60.0 | 52.4 | 21    |
| Lu905 | 1 | p2  | (AT)10                                                               | 2 | 209  | 211 |                 | lu905F | GCGTAACGCCTTATTTTCATAATTCC | 63.0 | 40.0 | 19+25 |
|       |   |     |                                                                      |   |      |     |                 | lu905R | CCAATTTCGACGAAGAGAAGC      | 60.0 | 50.0 | 20    |
| Lu906 | 1 | p2  | (TA)10                                                               | 2 | null | 248 |                 | lu906F | TGGTGTCTGTGCCTCTGAAG       | 60.0 | 55.0 | 19+20 |
|       |   |     |                                                                      |   |      |     |                 | lu906R | TGAAGATGACAACAGTGAAGA      | 58.3 | 40.9 | 22    |
| Lu908 | 1 | p2  | (TC)10                                                               | 2 | 296  | 314 |                 | lu908F | CACCCACCCATCTTACAACCTG     | 60.3 | 52.4 | 19+21 |
|       |   |     |                                                                      |   |      |     |                 | lu908R | GACGACGACGAGCAGTATGA       | 60.0 | 55.0 | 20    |
| Lu910 | 1 | p2  | (AT)11                                                               | 3 | 482  | 486 | 488             | lu910F | TCACTGCAGTACAGCACACC       | 58.4 | 55.0 | 19+20 |
|       |   |     |                                                                      |   |      |     |                 | lu910R | TTAACCCTCACGCCTACACC       | 60.0 | 55.0 | 20    |
| Lu912 | 1 | p2  | (TA)11                                                               | 3 | null | 390 | 392             | lu912F | AAGCTGGAGGCATATGTTGG       | 60.1 | 50.0 | 19+20 |
|       |   |     |                                                                      |   |      |     |                 | lu912R | CCTTTGCTACCCCATCTTCA       | 60.1 | 50.0 | 20    |
| Lu913 | 1 | p2  | (AT)11                                                               | 2 | 216  | 222 |                 | lu913F | TGCCAGTCACGATTGAGAAG       | 60.0 | 50.0 | 19+20 |
|       |   |     |                                                                      |   |      |     |                 | lu913R | GCATCTCCCTAAATCAAAT        | 53.5 | 35.0 | 20    |
| Lu917 | 1 | p2  | (AT)12                                                               | 2 | 349  | 365 |                 | lu917F | GTTTCTTCTCCTGCGTCCAC       | 59.9 | 55.0 | 19+20 |
|       |   |     |                                                                      |   |      |     |                 | lu917R | AACCCATTTCGAACATCCCTA      | 59.2 | 45.0 | 20    |

|         |   |    |        |   |      |             |         |                            |      |      |       |
|---------|---|----|--------|---|------|-------------|---------|----------------------------|------|------|-------|
| Lu918   | 1 | p2 | (GA)12 | 2 | null | 223         | lu918F  | GCACAGACGACTAGTACCGAGA     | 59.6 | 54.5 | 19+22 |
|         |   |    |        |   |      |             | lu918R  | CCTACTCCCCCTCCTTCTTG       | 60.1 | 60.0 | 20    |
| Lu919   | 1 | p2 | (TA)12 | 3 | 266  | 268 272     | lu919F  | GGGATTCCAGTGACCAAAT        | 58.7 | 45.0 | 19+20 |
|         |   |    |        |   |      |             | lu919R  | TGAAGGAAGATAGGCGATGG       | 60.2 | 50.0 | 20    |
| Lu920   | 1 | p2 | (GA)12 | 3 | 360  | 362 364     | lu920F  | TTAACACAGGGGTTGGAGGA       | 60.3 | 50.0 | 19+20 |
|         |   |    |        |   |      |             | lu920R  | AGCAGGAAGCAGAATCAGCA       | 61.2 | 50.0 | 20    |
| Lu921   | 1 | p2 | (CT)12 | 2 | 368  | 370         | lu921F  | GTGCTGTGCCTGTGAAAAAC       | 59.3 | 50.0 | 19+20 |
|         |   |    |        |   |      |             | lu921R  | AGTCCAATGGAGGTGTGGAG       | 60.0 | 55.0 | 20    |
| Lu922   | 1 | p2 | (TC)12 | 3 | 204  | 236 250     | lu922F  | GCAACTCCTCTCCACTCCAA       | 60.4 | 55.0 | 19+20 |
|         |   |    |        |   |      |             | lu922R  | AAGTTGTTCGGAGGTGGTGTC      | 60.0 | 55.0 | 20    |
| Lu923   | 1 | p2 | (TC)13 | 2 | 379  | 381         | lu923F  | CAACGACACCACCCTTTTCT       | 60.0 | 50.0 | 19+20 |
|         |   |    |        |   |      |             | lu923R  | AGGATGGTGAAGTGGAAAGC       | 59.1 | 50.0 | 20    |
| Lu925   | 1 | p2 | (GA)13 | 2 | 460  | 462         | lu925F  | GGGGCAAACAAGTGAAGCTA       | 60.2 | 50.0 | 19+20 |
|         |   |    |        |   |      |             | lu925R  | GGAGCACAATATGCGAAGGT       | 60.1 | 50.0 | 20    |
| Lu926Ba | 2 | p2 | (AG)14 | 2 | null | 670         | lu926BF | TCTGAGCACAGATGCATTATCA     | 59.4 | 40.9 | 19+22 |
| Lu926Bb |   |    |        | 2 | 594  | 596         | lu926BR | TTATCAGCTGTGTGGCCTTG       | 59.9 | 50.0 | 20    |
| Lu927   | 1 | p2 | (TA)14 | 3 | 174  | 176 180     | lu927F  | CGGTTTGGCTTTGCTTTTT        | 60.2 | 42.1 | 19+19 |
|         |   |    |        |   |      |             | lu927R  | TCCAGCAACGGAAATTGAA        | 60.2 | 42.1 | 19    |
| Lu928   | 1 | p2 | (CT)15 | 3 | 241  | 243 245     | lu928F  | TCCCCAAAGTAATATTGAGCAG     | 58.3 | 40.9 | 19+22 |
|         |   |    |        |   |      |             | lu928R  | CTGGGCCCTACGTGATGTAT       | 59.8 | 55.0 | 20    |
| Lu932   | 1 | p2 | (AT)20 | 4 | 306  | 308 312 328 | lu932F  | CTGGGATGTTAGGAGGTGGA       | 59.9 | 55.0 | 19+20 |
|         |   |    |        |   |      |             | IU932R  | CCAAACCGATGATCCATACC       | 60.0 | 50.0 | 20    |
| Lu933   | 1 | p2 | (AG)20 | 4 | 242  | 250 252 254 | lu933F  | TCGAACGAGGATGAATGACA       | 60.2 | 45.0 | 19+20 |
|         |   |    |        |   |      |             | lu933R  | GAAGCTGAAGCTGGGTAACG       | 60.0 | 55.0 | 20    |
| Lu934   | 1 | p2 | (TC)20 | 3 | 213  | 215 217     | lu934F  | GCTTCAACACCAGTCACCAA       | 59.7 | 50.0 | 19+20 |
|         |   |    |        |   |      |             | lu934R  | CCGGTCCAAAGCTTGAAGA        | 61.3 | 52.6 | 19    |
| Lu935   | 1 | p2 | (AT)20 | 4 | 346  | 354 358 360 | lu935F  | CCAGCAATCATCAGCAGCTA       | 60.1 | 50.0 | 19+20 |
|         |   |    |        |   |      |             | lu935R  | CAACCTCTATTTATTAATTTAGCAAC | 54.5 | 26.9 | 26    |
| Lu940   | 1 | p3 | (AGG)6 | 2 | null | 389         | lu940F  | ATGGAGGTGCAGAGGATCAC       | 60.1 | 55.0 | 19+20 |
|         |   |    |        |   |      |             | lu940R  | TAACTCCCTCCTCCCATCCT       | 59.9 | 55.0 | 20    |
| Lu943   | 1 | p3 | (TAT)6 | 4 | null | 271 274 273 | lu943F  | AAATAACCACCAAAGCTTGA       | 55.0 | 35.0 | 19+20 |
|         |   |    |        |   |      |             | lu943R  | AAATCGTGCGATCCGAATAC       | 59.9 | 45.0 | 20    |
| Lu944   | 1 | p3 | (CTT)6 | 3 | 306  | 309 312     | lu944F  | ACGGGTGGCTATGACCAATA       | 60.2 | 50.0 | 19+20 |
|         |   |    |        |   |      |             | lu944R  | ATCACAGTATGCGGGAAAGG       | 60.0 | 50.0 | 20    |
| Lu951   | 1 | p3 | (GCT)6 | 2 | null | 288         | lu951F  | CATGGTATCAGTGGGGCTCT       | 60.0 | 55.0 | 19+20 |
|         |   |    |        |   |      |             | lu951R  | ATGGAAGAGGAGAAGCAGCA       | 60.1 | 50.0 | 20    |
| Lu955   | 1 | p3 | (TTC)6 | 2 | 381  | 445         | lu955F  | AGATGGACCAGACCGAAGTG       | 60.1 | 55.0 | 19+20 |
|         |   |    |        |   |      |             | lu955R  | ACCGGAAACGATTTTACCAA       | 59.3 | 40.0 | 20    |
| Lu958   | 1 | p3 | (AGT)6 | 2 | 386  | 389         | lu958F  | AACGGAGCTGCACTGATTCT       | 60.0 | 50.0 | 19+20 |
|         |   |    |        |   |      |             | lu958R  | CCGGTTAGTTCCTTCCTTCC       | 59.9 | 55.0 | 20    |
| Lu959   | 1 | p3 | (GCT)6 | 2 | 236  | 239         | lu959F  | AAATCGCTGGTCTCTGCTGT       | 60.0 | 50.0 | 19+20 |
|         |   |    |        |   |      |             | lu959R  | CAACCGGGGAGGGAATAAT        | 60.9 | 52.6 | 19    |

|         |   |    |        |   |      |     |          |                        |                       |      |       |       |
|---------|---|----|--------|---|------|-----|----------|------------------------|-----------------------|------|-------|-------|
| Lu961B  | 1 | p3 | (TTC)6 | 2 | 752  | 755 | lu961BF  | AATTTTGA AAC CCTCGTGGA | 59.4                  | 40.0 | 19+20 |       |
|         |   |    |        |   |      |     | lu961BR  | GTCAATCATCCCTTGCCACT   | 59.9                  | 50.0 | 20    |       |
| Lu963   | 1 | p3 | (GAT)6 | 2 | 369  | 372 | lu963F   | CAAAACCTGCTCCTCCCATA   | 60.1                  | 50.0 | 19+20 |       |
|         |   |    |        |   |      |     | lu963R   | CCACAACCAAATGGGAAATC   | 60.0                  | 45.0 | 20    |       |
| Lu965   | 1 | p3 | (CCG)6 | 2 | 573  | 576 | lu965F   | CATCGGTCTGGCAATTCTTT   | 60.1                  | 45.0 | 19+20 |       |
|         |   |    |        |   |      |     | lu965R   | GTGCAATGGGA ACTCCTGAT  | 59.9                  | 50.0 | 20    |       |
| Lu966   | 1 | p3 | (ACA)6 | 2 | 377  | 383 | lu966F   | CCAAACCTCTGATGGGAAAA   | 59.9                  | 45.0 | 19+20 |       |
|         |   |    |        |   |      |     | lu966R   | GTTATCAGGTGGGCAGGGTA   | 59.8                  | 55.0 | 20    |       |
| Lu968   | 1 | p3 | (CTT)6 | 2 | 303  | 306 | lu968F   | CCATCCCTTCCTTCTCATCA   | 60.0                  | 50.0 | 19+20 |       |
|         |   |    |        |   |      |     | lu968R   | GGTGGTGTTAGGTCCCTTCA   | 59.8                  | 55.0 | 20    |       |
| Lu970   | 1 | p3 | (TCT)6 | 2 | null | 253 | lu970F   | AATCAGCGGGGAAAGAAGAC   | 60.6                  | 50.0 | 19+20 |       |
|         |   |    |        |   |      |     | lu970R   | TCTCCCCTCCAACATTTCTG   | 60.0                  | 50.0 | 20    |       |
| Lu980   | 1 | p3 | (CGC)6 | 3 | 257  | 263 | 266      | lu980F                 | CCACACGACACAACAACA    | 60.1 | 50.0  | 19+20 |
|         |   |    |        |   |      |     | lu980R   | GCAAGGAGATTATCCGGTGA   | 60.0                  | 50.0 | 20    |       |
| Lu981   | 1 | p3 | (TTC)6 | 2 | 829  | 835 | lu981F   | AACTCCTGCACCAAAGCCTA   | 59.9                  | 50.0 | 19+20 |       |
|         |   |    |        |   |      |     | lu981R   | GGAGGCAAAAACCAATTGAA   | 59.9                  | 40.0 | 20    |       |
| Lu987   | 1 | p3 | (AAG)6 | 3 | 285  | 288 | 294      | lu987F                 | AAAATTGGAGTGACCGATGC  | 59.9 | 45.0  | 19+20 |
|         |   |    |        |   |      |     | lu987R   | GAGGAAAGGAGCAAATGCAG   | 60.0                  | 50.0 | 20    |       |
| Lu988   | 1 | p3 | (CAC)6 | 2 | null | 251 | lu988F   | ACTCTCACCATGTGCCCTTC   | 60.1                  | 55.0 | 19+20 |       |
|         |   |    |        |   |      |     | lu988R   | GGTGGGTTGAGATGAATGCT   | 59.9                  | 50.0 | 20    |       |
| Lu989   | 1 | p3 | (TGA)6 | 2 | 331  | 334 | lu989F   | ACGTCGGCTCTGTTGACTCT   | 60.1                  | 55.0 | 19+20 |       |
|         |   |    |        |   |      |     | lu989R   | TACGGCCCTTACAACAAACC   | 59.9                  | 50.0 | 20    |       |
| Lu990   | 1 | p3 | (CCT)6 | 2 | null | 383 | lu990F   | GTCTCCGTCTGAAAAGCAG    | 60.0                  | 55.0 | 19+20 |       |
|         |   |    |        |   |      |     | lu990R   | GATCCTATCACCCCATCAA    | 59.6                  | 50.0 | 20    |       |
| Lu991   | 1 | p3 | (CCG)6 | 2 | 340  | 343 | lu991F   | TCGATTTAATCCTCGCCAAG   | 60.2                  | 45.0 | 19+20 |       |
|         |   |    |        |   |      |     | lu991R   | CGACAGAGGTGAAGACGACA   | 60.0                  | 55.0 | 20    |       |
| Lu994   | 1 | p3 | (CGG)6 | 2 | 287  | 293 | lu994F   | GTGGTGGAGTAGGCGGAGTA   | 60.1                  | 60.0 | 19+20 |       |
|         |   |    |        |   |      |     | lu994R   | TCCCTCAACGTTCCATTTTC   | 59.9                  | 45.0 | 20    |       |
| Lu996   | 1 | p3 | (TAT)6 | 2 | 222  | 225 | lu996F   | CGTCCAAACAAAAGATGCAA   | 59.7                  | 40.0 | 19+20 |       |
|         |   |    |        |   |      |     | lu996R   | GCCTGCAGTTTAGTCGTTGG   | 60.8                  | 55.0 | 20    |       |
| Lu998   | 1 | p3 | (TTA)6 | 3 | null | 367 | 382      | lu998F                 | CGTCCGGATTTTGATTCTTC  | 59.5 | 45.0  | 19+20 |
|         |   |    |        |   |      |     | lu998R   | GAGAGGGAATCGAGGAGGAG   | 60.3                  | 60.0 | 20    |       |
| Lu999   | 1 | p3 | (CGG)6 | 3 | 593  | 596 | 599      | lu999F                 | CTGCGGTTGTTGCGGATAAGT | 60.1 | 50.0  | 19+20 |
|         |   |    |        |   |      |     | lu999R   | GCTTTCTCGTTTCGTTTGCTC  | 60.1                  | 50.0 | 20    |       |
| Lu1001  | 1 | p3 | (ATC)6 | 2 | 249  | 252 | lu1001F  | TGGGTCCAAAGTACCAACAA   | 58.9                  | 45.0 | 19+20 |       |
|         |   |    |        |   |      |     | lu1001R  | AGCCGTACCAGATGAGTTG    | 60.1                  | 55.0 | 20    |       |
| Lu1002B | 1 | p3 | (CTT)6 | 2 | null | 239 | lu1002BF | TCTTCCTTGGCTCTTCTTCG   | 59.7                  | 50.0 | 19+20 |       |
|         |   |    |        |   |      |     | lu1002BR | AGCTGGCCAATCATGTTTCT   | 59.7                  | 45.0 | 20    |       |
| Lu1006  | 1 | p3 | (TCA)6 | 2 | 778  | 790 | lu1006F  | TTCTCTGGCTGTGCTTTCT    | 60.1                  | 50.0 | 19+20 |       |
|         |   |    |        |   |      |     | lu1006R  | AACATGGGCAAAGAACAAGG   | 60.0                  | 45.0 | 20    |       |
| Lu1007  | 1 | p3 | (GCC)6 | 2 | 328  | 331 | lu1007F  | TTCTGGCAA ACTCCAACC    | 60.1                  | 45.0 | 19+20 |       |
|         |   |    |        |   |      |     | lu1007R  | CATCCAGAAGCAATGCAGAA   | 59.9                  | 45.0 | 20    |       |

|         |   |    |        |   |      |             |          |                         |      |      |       |
|---------|---|----|--------|---|------|-------------|----------|-------------------------|------|------|-------|
| Lu1015  | 1 | p3 | (GGA)6 | 2 | 264  | 267         | lu1015F  | GACTTGTTCTGTTGGGATTGA   | 59.9 | 50.0 | 19+20 |
|         |   |    |        |   |      |             | lu1015R  | AAGCGCCATTGTCAGTTAGC    | 60.4 | 50.0 | 20    |
| Lu1022a | 2 | p3 | (AAG)6 | 3 | 335  | 338 341     | lu1022F  | AGGACCAAAAATCGGGAAAAC   | 60.2 | 45.0 | 19+20 |
| Lu1022b |   |    |        | 3 | null | 326 329     | lu1022R  | GGGGAGGGAGGTTCTAACAA    | 60.3 | 55.0 | 20    |
| Lu1028  | 1 | p3 | (CTG)6 | 2 | 378  | 381         | lu1028F  | TCGTTCTTCTGCAACAATGC    | 60.0 | 45.0 | 19+20 |
|         |   |    |        |   |      |             | lu1028R  | CCCAACTTGAATGCAGGACT    | 60.1 | 50.0 | 20    |
| Lu1034  | 1 | p3 | (TCC)6 | 2 | 291  | 306         | lu1034F  | CAACCCTTTAGCAGGAGCTG    | 60.0 | 55.0 | 19+20 |
|         |   |    |        |   |      |             | lu1034R  | GTATGACGGGTCGGATTACG    | 60.2 | 55.0 | 20    |
| Lu1037  | 1 | p3 | (TGC)6 | 2 | 540  | 546         | lu1037F  | TCCCATGAATTGTTGCAGAA    | 60.0 | 40.0 | 19+20 |
|         |   |    |        |   |      |             | lu1037R  | CAATAGCTGCCCTTGTCCAT    | 60.1 | 50.0 | 20    |
| Lu1039  | 1 | p3 | (GCA)6 | 2 | 352  | 355         | lu1039F  | TGATCCCATGTTCTGGAATG    | 59.3 | 45.0 | 19+20 |
|         |   |    |        |   |      |             | lu1039R  | AAGTACTTCTGGGCGTCGAA    | 59.9 | 50.0 | 20    |
| Lu1041  | 1 | p3 | (TCT)6 | 3 | 127  | 151 154     | lu1041F  | TTGCGACTGTTCTTGTGTTG    | 59.9 | 42.9 | 19+21 |
|         |   |    |        |   |      |             | lu1041R  | CATCTCATTGTTGTTTGCAG    | 58.3 | 38.1 | 21    |
| Lu1042  | 1 | p3 | (AGC)6 | 2 | 231  | 234         | lu1042F  | TCCGGTGGGAGATCAGTTAG    | 60.1 | 55.0 | 19+20 |
|         |   |    |        |   |      |             | lu1042R  | GGAAAAGCTCCAGTGTCCA     | 60.2 | 50.0 | 20    |
| Lu1043  | 1 | p3 | (CAT)8 | 2 | 385  | 391         | lu1043F  | TGCAGGGTTATTCTGGGAAC    | 59.9 | 50.0 | 19+20 |
|         |   |    |        |   |      |             | lu1043R  | CTGGCAAGTGATCTGCTCAA    | 60.1 | 50.0 | 20    |
| Lu1044B | 1 | p3 | (TTC)6 | 2 | null | 486         | lu1044BF | CTGTGAAAAAGGCTGCGACT    | 60.6 | 50.0 | 19+20 |
|         |   |    |        |   |      |             | lu1044BR | TCCCCCTACTTCAGGTCAAA    | 59.5 | 50.0 | 20    |
| Lu1049  | 1 | p3 | (AAT)6 | 3 | null | 300 388     | lu1049F  | AAGGAGTACTGGACGATAATGGA | 59.0 | 43.5 | 19+23 |
|         |   |    |        |   |      |             | lu1049R  | ATCCCGACGTTTGTCCAC      | 60.8 | 52.6 | 19    |
| Lu1050  | 1 | p3 | (AAT)6 | 2 | null | 229         | lu1050F  | CCCAGCAGTCGTCTCTCTTC    | 60.1 | 60.0 | 19+20 |
|         |   |    |        |   |      |             | lu1050R  | AGGAAATCCCTCGTCAACCT    | 59.9 | 50.0 | 20    |
| Lu1052  | 1 | p3 | (ATC)6 | 2 | 365  | 371         | lu1052F  | GCAGTGGAGAGAACCAAAGC    | 60.0 | 55.0 | 19+20 |
|         |   |    |        |   |      |             | lu1052R  | CACAGGAAAAAGGTGGTGGT    | 59.9 | 50.0 | 20    |
| Lu1055  | 1 | p3 | (TTC)6 | 2 | null | 450         | lu1055F  | TTGATGAAGCCGTCAAAATC    | 58.7 | 40.0 | 19+20 |
|         |   |    |        |   |      |             | lu1055R  | GAGAGGAACGAAGCATGGAG    | 60.0 | 55.0 | 20    |
| Lu1060  | 1 | p3 | (TAG)6 | 2 | 203  | 239         | lu1060F  | GGAGACCCCATGACACAAC     | 60.2 | 55.0 | 19+20 |
|         |   |    |        |   |      |             | lu1060R  | GCTCCATTCTTGCTCTTTG     | 60.0 | 50.0 | 20    |
| Lu1066  | 1 | p3 | (CTT)6 | 3 | 213  | 219 222     | lu1066F  | TTGATCCGGTCATCATCTCA    | 60.0 | 45.0 | 19+20 |
|         |   |    |        |   |      |             | lu1066R  | AGCTAGGGCGATACGTCTGA    | 60.0 | 55.0 | 20    |
| Lu1071  | 1 | p3 | (ATT)7 | 2 | 223  | 226         | lu1071F  | GGAGCAAGCATTTCATGT      | 52.5 | 47.0 | 19+17 |
|         |   |    |        |   |      |             | lu1071R  | CGTCGTTTTCATGTGTTTTGG   | 60.0 | 45.0 | 20    |
| Lu1073  | 1 | p3 | (TCT)7 | 2 | 873  | 879         | lu1073F  | GCACAACCACTACCGGAGAT    | 60.0 | 55.0 | 19+20 |
|         |   |    |        |   |      |             | lu1073R  | ATCGCGAAAGAAATTGAGGA    | 59.8 | 40.0 | 20    |
| Lu1077  | 1 | p3 | (GGT)7 | 4 | 329  | 332 334 335 | lu1077F  | TCACAGTGCAGGAATGAAG     | 60.0 | 50.0 | 19+20 |
|         |   |    |        |   |      |             | lu1077R  | CATAGGGCCTAGCCTCATCA    | 60.2 | 55.0 | 20    |
| Lu1086  | 1 | p3 | (ACA)7 | 2 | 427  | 430         | lu1086F  | CTGACACACCCAATCATTGAA   | 59.4 | 42.9 | 19+21 |
|         |   |    |        |   |      |             | lu1086R  | ATTTCCGGTTGATGTTGGAG    | 59.8 | 45.0 | 20    |
| Lu1087  | 1 | p3 | (ATA)7 | 2 | 360  | 363         | lu1087F  | AAGTCGGCCAAATCTTTGAT    | 58.6 | 40.0 | 19+20 |
|         |   |    |        |   |      |             | lu1087R  | GAAGAAGTGGCAGGAGATCG    | 60.0 | 55.0 | 20    |

|         |   |    |         |   |      |     |          |                        |                           |      |       |       |
|---------|---|----|---------|---|------|-----|----------|------------------------|---------------------------|------|-------|-------|
| Lu1089  | 1 | p3 | (TCT)7  | 2 | 196  | 199 | lu1089F  | TCCACTTCTAACTTCCAACA   | 53.3                      | 40.0 | 19+20 |       |
|         |   |    |         |   |      |     | lu1089R  | GCGAATGAGCTTTTCGTCTT   | 59.6                      | 45.0 | 20    |       |
| Lu1094  | 1 | p3 | (CTC)7  | 2 | 357  | 360 | lu1094F  | TCAAGGAACAAACCCAATCC   | 59.8                      | 45.0 | 19+20 |       |
|         |   |    |         |   |      |     | lu1094R  | GCCAATTGTGCCTATGTTGA   | 59.5                      | 45.0 | 20    |       |
| Lu1100  | 1 | p3 | (TGC)7  | 2 | 261  | 267 | lu1100F  | AATCCGGCCAGACAATGTAG   | 60.0                      | 50.0 | 19+20 |       |
|         |   |    |         |   |      |     | lu1100R  | CTACCACTGCCCCAAGATA    | 59.9                      | 55.0 | 20    |       |
| Lu1101  | 1 | p3 | (GTG)7  | 2 | 351  | 360 | lu1101F  | TTTCCTTCTCCGTGCGTACT   | 59.9                      | 50.0 | 19+20 |       |
|         |   |    |         |   |      |     | lu1101R  | GCGTCAGAACTCCAAGAGGA   | 60.5                      | 55.0 | 20    |       |
| Lu1103  | 1 | p3 | (TAG)7  | 2 | 390  | 396 | lu1103F  | GCAACAACCTCCACCCTGACT  | 60.2                      | 55.0 | 19+20 |       |
|         |   |    |         |   |      |     | lu1103R  | CGCAGTTTGAATGTTGAACG   | 60.3                      | 45.0 | 20    |       |
| Lu1104  | 1 | p3 | (ATG)7  | 2 | 333  | 339 | lu1104F  | CAAAACAAGGGATGGGAAA    | 59.8                      | 40.0 | 19+20 |       |
|         |   |    |         |   |      |     | lu1104R  | AAGAACAAGCGCAGAAAGC    | 59.8                      | 45.0 | 20    |       |
| Lu1106  | 1 | p4 | (AGTA)5 | 2 | 296  | 300 | lu1106F  | GGGCAGGTGAAATGACAAGT   | 60.0                      | 50.0 | 19+20 |       |
|         |   |    |         |   |      |     | lu1106R  | GGAGTGGAGACAGCAAGAGC   | 60.1                      | 60.0 | 20    |       |
| Lu1107  | 1 | p3 | (CTT)7  | 3 | 283  | 286 | 290      | lu1107F                | ACGGGTGGCTATGACCAATA      | 60.2 | 50.0  | 19+20 |
|         |   |    |         |   |      |     | lu1107R  | AGACTGCCACGTTCCATTTT   | 60.1                      | 50.0 | 20    |       |
| Lu1112  | 1 | p3 | (CAG)7  | 2 | 267  | 270 | lu1112F  | GCAGCAGTCAATGCATCAGT   | 60.0                      | 50.0 | 19+20 |       |
|         |   |    |         |   |      |     | lu1112R  | AAGAGGCATCCCCTTGAGAT   | 60.0                      | 50.0 | 20    |       |
| Lu1115  | 1 | p3 | (CGG)7  | 2 | null | 375 | lu1115F  | CGGAGCAATTGAAGAAGGAG   | 59.9                      | 50.0 | 19+20 |       |
|         |   |    |         |   |      |     | lu1115R  | AATAGCAATTCCGTCCGATG   | 59.9                      | 45.0 | 20    |       |
| Lu1116  | 1 | p3 | (GAA)7  | 2 | 241  | 244 | lu1116F  | GATGGAAATAGCAGCGTGGT   | 60.1                      | 50.0 | 19+20 |       |
|         |   |    |         |   |      |     | lu1116R  | CCGAAGTAGCCATTGTTGGT   | 60.0                      | 50.0 | 20    |       |
| Lu1117  | 1 | p3 | (AAG)9  | 3 | 200  | 203 | 206      | lu1117F                | GCGGCCATTCTCTATTTCT       | 60.6 | 50.0  | 19+20 |
|         |   |    |         |   |      |     | lu1117R  | CTCTTGCTGTTGTTGTTGTTGA | 59.0                      | 40.9 | 22    |       |
| Lu1119B | 1 | p3 | (TCA)7  | 2 | 712  | 715 | lu1119BF | TTCTGAGTTTTTCCCCTCTTTC | 58.9                      | 40.9 | 19+22 |       |
|         |   |    |         |   |      |     | lu1119BR | TAACAACCCTCTCCCGATTG   | 59.9                      | 50.0 | 20    |       |
| Lu1121  | 1 | p3 | (TTC)8  | 2 | 249  | 252 | lu1121F  | GCTATGGCGGAGCTATTGAG   | 60.0                      | 55.0 | 19+20 |       |
|         |   |    |         |   |      |     | lu1121R  | GCTTTCATTCCCCTGAACAA   | 60.1                      | 45.0 | 20    |       |
| Lu1124  | 1 | p3 | (TTC)8  | 2 | 305  | 308 | lu1124F  | CGATGGTGGATTTGTTTTCC   | 60.2                      | 45.0 | 19+20 |       |
|         |   |    |         |   |      |     | lu1124R  | GTGGGGAGAAATTGGAAGGT   | 60.2                      | 50.0 | 20    |       |
| Lu1125  | 1 | p3 | (ACA)8  | 2 | 201  | 204 | lu1125F  | CCAAACTGTCCCCACAAATC   | 60.2                      | 50.0 | 19+20 |       |
|         |   |    |         |   |      |     | lu1125R  | TGCTGAGATGCTGAAAGGAA   | 59.7                      | 45.0 | 20    |       |
| Lu1127  | 1 | p3 | (TCT)8  | 2 | 523  | 526 | lu1127F  | TGGTGCCACAGCTATCAAAG   | 59.9                      | 50.0 | 19+20 |       |
|         |   |    |         |   |      |     | lu1127R  | GGAGGAGGAGCATAGCACTG   | 60.0                      | 60.0 | 20    |       |
| Lu1130  | 1 | p3 | (TAT)8  | 2 | 501  | 507 | lu1130F  | CAGTTCCATGTGTTTCATTCCA | 60.8                      | 40.9 | 19+22 |       |
|         |   |    |         |   |      |     | lu1130R  | ATCCAGAACCAGTTGCAAGG   | 60.1                      | 50.0 | 20    |       |
| Lu1133  | 1 | p3 | (GAA)8  | 2 | null | 272 | lu1133F  | TGCCAAGAAAGCAGAAACAA   | 59.6                      | 40.0 | 19+20 |       |
|         |   |    |         |   |      |     | lu1133R  | GAGTGGAGAGAGGGACGATG   | 59.8                      | 60.0 | 20    |       |
| Lu1134  | 1 | p3 | (AAG)8  | 2 | 197  | 200 | lu1134F  | CGGCTCCCTGAATCCTTAC    | 59.6                      | 57.9 | 19+19 |       |
|         |   |    |         |   |      |     | lu1134R  | CCAGGTGATGAGCAGCAGTA   | 60.0                      | 55.0 | 20    |       |
| Lu1135  | 1 | p3 | (AAT)8  | 3 | 287  | 296 | 299      | lu1135F                | CAGTAAGCAATGAAAAGTTCCAGAC | 60.5 | 40.0  | 19+25 |
|         |   |    |         |   |      |     | lu1135R  | GAGCCATTGCCTGAGTTCAC   | 60.8                      | 55.0 | 20    |       |

|         |   |    |         |   |      |     |         |                             |                             |                      |       |       |       |
|---------|---|----|---------|---|------|-----|---------|-----------------------------|-----------------------------|----------------------|-------|-------|-------|
| Lu1136  | 1 | p3 | (GCT)8  | 2 | null | 260 | lu1136F | GTGCAAGAATGGTGGTGATG        | 60.0                        | 50.0                 | 19+20 |       |       |
|         |   |    |         |   |      |     | lu1136R | TCCCAACTTCAAACATGACG        | 59.5                        | 45.0                 | 20    |       |       |
| Lu1138  | 1 | p3 | (GCT)8  | 2 | 332  | 335 | lu1138F | TGGTACAACACGAGCAGCA         | 60.0                        | 52.6                 | 19+19 |       |       |
|         |   |    |         |   |      |     | lu1138R | TGGCAGCTATGTGTCTCCAG        | 60.0                        | 55.0                 | 20    |       |       |
| Lu1140a | 2 | p3 | (TGT)8  | 2 | 454  | 457 | lu1140F | CACACTTCCCCCATATCCAT        | 59.5                        | 50.0                 | 19+20 |       |       |
| Lu1140b |   |    |         | 2 | 415  | 444 | lu1140R | TCACAAACTGACACACCAATCA      | 60.0                        | 40.9                 | 22    |       |       |
| Lu1144  | 1 | p3 | (GAG)8  | 3 | 309  | 312 | 315     | lu1144F                     | AACTGCAATTAGCCGACGAC        | 60.3                 | 50.0  | 19+20 |       |
|         |   |    |         |   |      |     | lu1144R | GCAAACCTCAGCTTTTCTGG        | 60.0                        | 50.0                 | 20    |       |       |
| Lu1145  | 1 | p3 | (TCT)8  | 2 | 269  | 275 | lu1145F | GGAAATCAACGGTCATGGTT        | 59.7                        | 45.0                 | 19+20 |       |       |
|         |   |    |         |   |      |     | lu1145R | GGAGGAGAGGGAGAAATTGG        | 60.0                        | 55.0                 | 20    |       |       |
| Lu1146a | 2 | p3 | (CTG)9  | 2 | 307  | 319 | lu1146F | AACCAAATCCGCACTTTGAC        | 60.0                        | 45.0                 | 19+20 |       |       |
| Lu1146b |   |    |         | 2 | 291  | 303 | lu1146R | GAGCAGAGCAGATCAGAATCAG      | 59.3                        | 50.0                 | 22    |       |       |
| Lu1147  | 1 | p3 | (AAT)9  | 2 | 366  | 378 | lu1147F | AGTGTAGAAGCACCTTGAGATATTATT | 57.4                        | 33.3                 | 19+27 |       |       |
|         |   |    |         |   |      |     | lu1147R | GCGTAGGAGCTGAAACTTGG        | 60.0                        | 55.0                 | 20    |       |       |
| Lu1148  | 1 | p3 | (TTC)9  | 4 | 267  | 273 | 282     | 288                         | lu1148F                     | TGGGACAAAATACGCAGTGA | 60.1  | 45.0  | 19+20 |
|         |   |    |         |   |      |     | lu1148R | TGAGCATTGTGAAGGAGACG        | 60.0                        | 50.0                 | 20    |       |       |
| Lu1151  | 1 | p3 | (AAG)9  | 2 | 454  | 466 | lu1151F | CGTATGTGGTGATGCCAAAG        | 60.0                        | 50.0                 | 19+20 |       |       |
|         |   |    |         |   |      |     | lu1151R | CCGCCTCTTTCAGAATTCOA        | 60.3                        | 45.0                 | 20    |       |       |
| Lu1157  | 1 | p3 | (TCT)9  | 2 | 389  | 392 | lu1157F | AAGAAACTCGGTGGTGATGG        | 60.0                        | 50.0                 | 19+20 |       |       |
|         |   |    |         |   |      |     | lu1157R | AAGAGTATTGCGGGAGAGCA        | 60.0                        | 50.0                 | 20    |       |       |
| Lu1158  | 1 | p3 | (CTT)10 | 2 | 317  | 320 | lu1158F | ACTTGGACCACATCACAACC        | 58.2                        | 50.0                 | 19+20 |       |       |
|         |   |    |         |   |      |     | lu1158R | GTTGGGTACAATGCGGGTAG        | 60.2                        | 55.0                 | 20    |       |       |
| Lu1160  | 1 | p3 | (CTT)10 | 3 | 381  | 399 | 402     | lu1160F                     | CCTACAAACTAAAACGGGACCA      | 60.3                 | 45.5  | 19+22 |       |
|         |   |    |         |   |      |     | lu1160R | GGAGAGTGCATCGTCTCACA        | 60.0                        | 55.0                 | 20    |       |       |
| Lu1161  | 1 | p3 | (TAT)11 | 2 | 216  | 231 | lu1161F | CTTTGATTTGAATAGCGGGTTA      | 58.3                        | 36.4                 | 19+22 |       |       |
|         |   |    |         |   |      |     | lu1161R | GCTATTGGCCTCTGCTTCTG        | 60.1                        | 55.0                 | 20    |       |       |
| Lu1162  | 1 | p3 | (TTC)11 | 4 | 674  | 677 | 681     | 684                         | lu1162F                     | GAGTTTTTCCCCGCAAG    | 60.6  | 55.6  | 19+18 |
|         |   |    |         |   |      |     | lu1162R | TGCAAAGGTGATCAAGTCCA        | 60.2                        | 45.0                 | 20    |       |       |
| Lu1163  | 1 | p3 | (ATC)11 | 4 | 258  | 264 | 267     | 270                         | lu1163F                     | GAACACAGTTGGCTCGAACA | 59.9  | 50.0  | 19+20 |
|         |   |    |         |   |      |     | lu1163R | GAAAGCCATCCAGCAAAGAG        | 60.0                        | 50.0                 | 20    |       |       |
| Lu1165  | 1 | p3 | (TTA)12 | 2 | 304  | 319 | lu1165F | CCTTTCGCTTCTCTCTCT          | 60.1                        | 55.0                 | 19+20 |       |       |
|         |   |    |         |   |      |     | lu1165R | TACCGGAAGCTACCCATCAC        | 60.0                        | 55.0                 | 20    |       |       |
| Lu1168  | 1 | p3 | (TCT)12 | 3 | 792  | 801 | 804     | lu1168F                     | CACCCCTTATCGCTCTGTA         | 60.1                 | 55.0  | 19+20 |       |
|         |   |    |         |   |      |     | lu1168R | CCATCGCTTCAGGAATGAGT        | 60.2                        | 50.0                 | 20    |       |       |
| Lu1169  | 1 | p3 | (CTT)13 | 2 | 309  | 312 | lu1169F | CTCCTTGATGACTCCTTCC         | 59.8                        | 55.0                 | 19+20 |       |       |
|         |   |    |         |   |      |     | lu1169R | CTTGGGTGAGAGGCTCTTTG        | 60.0                        | 55.0                 | 20    |       |       |
| Lu1170  | 1 | p3 | (CTT)13 | 2 | 203  | 215 | lu1170F | GGGAATTGATGGCTACTGGA        | 59.9                        | 50.0                 | 19+20 |       |       |
|         |   |    |         |   |      |     | lu1170R | TTACACAGAACGGGAGTGGA        | 59.1                        | 50.0                 | 20    |       |       |
| Lu1171  | 1 | p3 | (ATA)13 | 3 | 265  | 268 | 271     | lu1171F                     | CAAATTTTAAATGAATACAAAACATGA | 57.8                 | 18.5  | 19+27 |       |
|         |   |    |         |   |      |     | lu1171R | GTTGGCCAGAGAGAGATTCG        | 60.0                        | 55.0                 | 20    |       |       |
| Lu1172  | 1 | p3 | (TTC)14 | 2 | 446  | 464 | lu1172F | TCCATCATTCTTCCAAAGAT        | 54.6                        | 35.0                 | 19+20 |       |       |
|         |   |    |         |   |      |     | lu1172R | TGAGGATATGCGAGGAAAGG        | 60.2                        | 50.0                 | 20    |       |       |
